# Supplementary material for: Stepwise syntheses of tri- and tetraphosphaporphyrinogens
Source: Royal Society of Chemistry journal article supplement (doi:10.1039/c1cc15421d), 2011-11-17
Supplement: c1cc15421d.pdf [file c1cc15421d.pdf]

Supporting information for

**Stepwise syntheses of tri- and tetraphosphaporphyrinogens.**

*Duncan Carmichael, Aurélie Escalle- Lewis, Gilles Frison, Xavier- Frédéric Le Goff, and Eric Muller.*

We thank CNRS, the Ecole polytechnique and the Ministère de l'Enseignement Supérieur et de la Recherche for support, and GENCI-CINES (Grant 2011-c2011086123) for HPC resources. The “Hétéroéléments et Coordination” laboratory is part of the EC funded COST network PhoSciNet CM0802.

## Experimental Section

All operations were performed using canula techniques on Schlenk lines under a dry nitrogen atmosphere or in a Braun Labmaster 130 drybox under dry purified argon. Potassium fluoride was dried by protracted heating under reduced pressure at 200°C, and 18C6 was crystallised from acetonitrile prior to use; **4**<sup>[24]</sup>, **6**<sup>[39]</sup> and **7**<sup>[24]</sup> were prepared according to earlier protocols. Solvents were distilled under dry nitrogen: THF and ether from sodium benzophenoneketyl, pentane from sodium benzophenoneketyl/tetraglyme, acetonitrile from calcium hydride, methanol from sodium methoxide and dichloromethane from P<sub>4</sub>O<sub>10</sub>. (CD<sub>3</sub>)<sub>2</sub>SO and CD<sub>3</sub>CN were used as received from SigmaAldrich. NMR measurements were made on a Bruker Avance 300 spectrometer and are referenced to internal (CD<sub>3</sub>)<sub>2</sub>SO and CD<sub>3</sub>CN and external H<sub>3</sub>PO<sub>4</sub> as appropriate. Mass spectra were obtained from dichloromethane solutions on a Bruker electrospray MicroTOF spectrometer; infrared spectra were taken from KBr disks prepared under argon in a glovebox and measured on a Perkin Elmer System 2000 spectroscope.

**9:** A THF (30mL) solution of the 2,5-bis(chlorocarbonyl)phosphaferrocene **6** (1g, 2.34 mmol) was added dropwise over a period of three minutes to a well- stirred -78°C solution of **7** (2.48 g, 9.37 mmol) in THF (40 mL). The mixture was allowed to return to room temperature over 15 minutes, the solvent was removed under reduced pressure and the residue was washed with pentane (3x 15mL). The purity of the phospholide **8** can be established by <sup>31</sup>P NMR at this point [ $\delta$ : 151.9 (d,  $J_{PP}$  = 52.8 Hz, 2P); -13.6 (t,  $J_{PP}$  = 52.8 Hz, 1P)]. The dianion was redissolved in THF (80mL), treated with a further THF (20mL) solution of 2,5-di(chlorocarbonyl)phosphaferrocene **6** (810 mg, 1.90 mmol) at room temperature and, after stirring for a further 30 minutes, the solvent was removed under reduced pressure. The product was purified by flash chromatography on neutral alumina; apolar impurities were removed by washing the column with pentane and the product was collected as a red band upon elution with ether. The crude red sample of **9** (1.19 g, 48%) is sufficiently pure for use directly in the synthesis of **10**. A sample for analysis was crystallized from acetone C<sub>60</sub>H<sub>34</sub>Fe<sub>2</sub>O<sub>4</sub>P<sub>4</sub>Si<sub>2</sub> requires: C: 62.07%, H 7.29; found: C: 62.40%, H 7.42%.  $\nu$ IR (KBr) 1725 cm<sup>-1</sup> <sup>31</sup>P NMR (CD<sub>2</sub>Cl<sub>2</sub>): 70.6 (d,  $J_{PP}$  = 100.2 Hz, 2P), 46.9 (s), -48.4 (t,  $J_{PP}$  = 100.2 Hz, 1P). <sup>1</sup>H NMR (CD<sub>2</sub>Cl<sub>2</sub>): 2.22 (d,  $J_{PH}$  = 3.0 Hz, 6H, Me), 2.15 (d,  $J_{PH}$  = 2.0 Hz, 6H, Me), 2.10 (d,  $J_{PH}$  = 1,7 Hz, 6H, Me), 1.81 (s, 6H, Me), 1.68 (s, 15H, Cp\*), 1.51 (s, 15H, Cp\*), 0.99 (s, 18H, *t*-Bu), 0.35 (s, 6H, SiMe), 0.28 (s, 6H, SiMe). <sup>13</sup>C NMR (CD<sub>2</sub>Cl<sub>2</sub>): 211.8 (dd,  $J_{PC}$  = 46.2 Hz,  $J_{PC}$  = 27.8 Hz, PCO), 198.6 (dd,  $J_{PC}$  = 19.5 Hz,  $J_{PC}$  = 15.6 Hz, CO), 162.4 (d,  $J_{PC}$  = 3.3 Hz, PCCMe), 152.1 (d,  $J_{PC}$  = 12.1 Hz, PCCMe), 146.6 (d,  $J_{PC}$  = 16.7 Hz, PCCO), 137.4 (dd,  $J_{PC}$  = 38.9 Hz,  $J_{PC}$  = 5.8 Hz, PCSi), 102.9 (dd,  $J_{PC}$  = 62.6 Hz,  $J_{PC}$  = 4.8 Hz, PC), 101.9 (m, PCCMe), 101.4 (d,  $J_{PC}$  = 64.4 Hz, PC), 90.4 (dd,  $J_{PC}$  = 5.5 Hz,  $J_{PC}$  = 1.5 Hz, PCCMe), 85.6 (Cp\*), 85.5 (Cp\*), 28.0 (Me *t*-Bu), 20.6 (d,  $J_{PC}$  = 4.3 Hz, Me), 19.3 (SiC(Me)<sub>3</sub>), 16.3 (d,  $J_{PC}$  = 0.9 Hz, Me), 16.0 (d,  $J_{PC}$  = 17.4 Hz, Me), 12.0 (d,  $J_{PC}$  = 6.2 Hz, Me), 10.3 (Me du Cp\*), 10.2 (Me Cp\*), -2.1 (d,  $J_{PC}$  = 5.6 Hz, SiMe), -3.0 (d,  $J_{PC}$  = 7.5 Hz, SiMe)ppm.

**10.** KF (48mg, 0.80 mmol) and 18C6 (210 mg, 0.80 mmol) were added to a toluene (10mL) solution of **9** (260 mg, 0.22 mmol) and the mixture was heated at 100°C for 4h. The solution was cooled and filtered through a frit, and the crude orange- red precipitate of **7** was collected, extracted with acetonitrile (2 x 10mL) and dried (180 mg, 53%). Monocrystals suitable for the Xray diffraction study were obtained from saturated acetonitrile solution of **10** at -30°C.  $\nu$ IR<sub>(CO)</sub> (KBr) 1620, 1637 cm<sup>-1</sup>. <sup>31</sup>P NMR (CD<sub>3</sub>CN): 213.1 (t,  $J_{PP}$  = 131.2 Hz), -55.8 (t,  $J_{PP}$  = 131.0 Hz). <sup>1</sup>H NMR (CD<sub>3</sub>CN): 3.54 (s, 48H, 2 18C6), 2.29 (s, 12H, 4 Me), 1.98 (s, 12H, 4 Me), 1.87 (s, 30H, 2 Cp\*). <sup>13</sup>C NMR (CD<sub>3</sub>CN): 196.2 (m, CO), 153.3 (m, PC), 133.1 (PCCMe), 101.1 (dt,  $J_{CP}$  = 65.5 Hz,  $J_{CP}$  = 7.5 Hz), 92.8 (d,  $J_{CP}$  = 2.2 Hz, PCCMe), 83.2 (Cp\*), 70.9 (CH<sub>2</sub> 18C6), 15.1 (Me), 12.1 (Me), 11.1 (Me Cp\*).

**11:** A THF (10mL) solution of 2,6-bis(chlorocarbonyl)pyridine (231.0 mg, 1.13 mmol) was added dropwise over a period of thirty seconds to a well- stirred room temperature solution of **8** (1 g, 1.13

mmol) in THF (10 mL). The mixture was stirred at room temperature for 15 minutes, the solvent was removed under reduced pressure and the residue was washed with pentane (3x 15mL). After filtration through an alumina plug, a red band was collected from which the solvents were removed. The product (467 mg, 44 %) was dissolved in toluene (40 mL), KF (116 mg, 1.9 mmol) and 18C6 (525 mg, 1.9 mmol) were added and the mixture was heated at 100°C for 18h. The solution was cooled and filtered through a frit, and the crude red precipitate of **11** was collected and extracted into acetonitrile (3 x 10mL). Concentration to 2mL gave the product. (342 mg, 49%). Monocrystals suitable for the Xray diffraction study were obtained from saturated acetonitrile solution of **11** at -30°C.  $\nu_{\text{IR}(\text{CO})}$  (KBr) 1645, 1634  $\text{cm}^{-1}$   $^{31}\text{P}$  NMR ( $\text{CD}_3\text{CN}$ ) : 217.7 (d,  $J_{\text{PP}} = 113.0$  Hz), -25.6 (t,  $J_{\text{PP}} = 113.3$  Hz).  $^1\text{H}$  NMR ( $\text{CD}_3\text{CN}$ ): 7.58 (t,  $J_{\text{HH}} = 7.8$  Hz, 1H), 7.27 (d,  $J_{\text{HH}} = 7.8$  Hz, 2H), 3.54 (s, 70H, 3 18C6), 2.41 (s, 6H, 2 Me), 2.28 (s, 6H, 2 Me), 2.19 (s, 6H, 2 Me), 1.76 (s, 15H, Cp\*).  $^{13}\text{C}$  NMR ( $\text{CD}_3\text{CN}$ ): 198.4, 194.1, 163.9, 161.1, 141.8, 135.4, 134.1, 133.7, 122.5, 100.9, (d  $J_{\text{CP}} = 57.8$  Hz), 96.4, (d  $J_{\text{CP}} = 8.3$  Hz), 83.4, 71.4, (18C6) 15.8, 14.6, 12.1, 11.1 ppm.

**Crystal data:** Data were collected on a Nonius Kappa CCD diffractometer at 150(1) K using an Mo  $\text{K}\alpha$  ( $\lambda = 0.71073 \text{ \AA}$ ) source and graphite monochromator. Structures were solved in SIR 97 and refined in SHELXL-97 by full-matrix least-squares using anisotropic thermal displacement parameters for all non-hydrogen atoms.

**9:**  $\text{C}_{60}\text{H}_{84}\text{Fe}_2\text{O}_4\text{P}_4\text{Si}_2$ ,  $M = 580.52$  orthorhombic, space group:  $\text{Pca}2_1$ ,  $a = 23.209(1)$ ,  $b = 25.099(1)$ ,  $c = 20.610(1) \text{ \AA}$ .  $U = 12005.8(9) \text{ \AA}^3$ .  $Z = 16$ ,  $D_c = 1.285 \text{ g cm}^{-3}$ ,  $F(000) = 4928$ ,  $\mu = 0.674 \text{ cm}^{-1}$ . Of 25709 unique reflections from a red plate of 0.18 x 0.16 x 0.06 mm over  $h = -30$  to 25;  $k = -32$  to 30;  $l = -26$  to 19, 16505 having  $I > 2\sigma(I)$  were refined.  $wR_2 = 0.1730$ ,  $R_1 = 0.0566$ ,  $\text{GoF} = 1.036$ .

**10:**  $\text{C}_{48}\text{H}_{54}\text{Fe}_2\text{O}_4\text{P}_4 \cdot 2(\text{C}_{16}\text{H}_{30}\text{KN}_2\text{O}_6) \cdot 2(\text{C}_2\text{H}_3\text{N})$ ,  $M = 1146.66$  triclinic, space group:  $\text{P}-1$ ,  $a = 13.995(1)$ ,  $b = 14.050(1)$ ,  $c = 14.447(1) \text{ \AA}$   $\alpha = 108.305^\circ$ ,  $\beta = 106.230(1)^\circ$ ,  $\gamma = 109.092(1)^\circ$ .  $U = 2305.8(3) \text{ \AA}^3$ .  $Z = 1$ ,  $D_c = 1.285 \text{ g cm}^{-3}$ ,  $F(000) = 944$ ,  $\mu = 0.538 \text{ cm}^{-1}$ . Of 13331 unique reflections from a red block of 0.40 x 0.30 x 0.26 mm over  $h = -19$  to 17;  $k = -19$  to 19;  $l = -19$  to 20, 10339 having  $I > 2\sigma(I)$  were refined.  $wR_2 = 0.0999$ ,  $R_1 = 0.0358$ ,  $\text{GoF} = 1.059$ .

**11:**  $\text{C}_{61}\text{H}_{84}\text{FeK}_2\text{NO}_{16}\text{P}_3 \cdot \text{C}_2\text{H}_3\text{N}$   $M = 1355.31$  monoclinic, space group:  $\text{P}2_1/\text{c}$ ,  $a = 17.606(1)$ ,  $b = 16.733(1)$ ,  $c = 27.421(1) \text{ \AA}$ ,  $\beta = 125.457(2)^\circ$ .  $U = 6580.2(6) \text{ \AA}^3$ .  $Z = 4$ ,  $D_c = 1.368 \text{ g cm}^{-3}$ ,  $F(000) = 2864$ ,  $\mu = 0.496 \text{ cm}^{-1}$ . Of 11464 unique reflections from a red block of 0.22 x 0.18 x 0.02 mm over  $h = -20$  to 19;  $k = -19$  to 19;  $l = -31$  to 32; 8811 were refined.  $wR_2 = 0.165$ ,  $R_1 = 0.097$ ,  $\text{GoF} = 1.209$ .

#### Reference:

<sup>[39]</sup> D Carmichael, E Muller, XF le Goff, *Organometallics*, om-2011-00658k under submission.

## Computational methods

We use a well established methodology, the GGA density functional BP86,<sup>1,2,3</sup> to optimise all of our geometries. These geometry optimization calculations were accelerated using the Multipole Accelerated Resolution of Identity for J (MARI-J) approximation method,<sup>4</sup> as implemented in Turbomole v6.1.<sup>5</sup> Basis sets of split valence quality, labelled def2-SVP,<sup>6,7</sup> and the associated auxiliary basis sets to fit Coulomb potentials,<sup>8</sup> were employed in the geometry optimization for all atoms.

Reed and Weinhold's NBO analysis<sup>9,10,11</sup>, which gives molecular charge distribution in terms of natural population analysis, as well as the NICS calculations<sup>12</sup> at the center of the phospholyl ring were conducted with Gaussian 09<sup>13</sup> at the B3LYP level using the 6-31++G(d,p) basis set all atoms.

## Bibliography

- [1] Vosko, S.; Wilk, L.; Nusair, M. *Can. J. Phys.* **1980**, *58*, 1200-1211.
- [2] Perdew, J. P. *Phys. Rev. B* **1986**, *33*, 8822-8824.
- [3] Becke, A. D. *Phys. Rev. A* **1988**, *38*, 3098-3100.
- [4] Sierka, M.; Hogeckamp, A.; Ahlrichs, R. *J. Chem. Phys.* **2003**, *118*, 9136-9148.
- [5] Ahlrichs, R.; Bär, M.; Häser, M.; Horn, H.; Kölmel, C. *Chem. Phys. Lett.* **1989**, *162*, 165-169.
- [6] Schäfer, A.; Horn, H.; Ahlrichs, R. *Chem. Phys.* **1992**, *97*, 2571-2577.
- [7] Weigend, F.; Ahlrichs, R. *Phys. Chem. Chem. Phys.* **2005**, *7*, 3297-3305.
- [8] Weigend, F. *Phys. Chem. Chem. Phys.* **2006**, *8*, 1057-1065.
- [9] Reed, A. E.; Weinhold, F. *J. Chem. Phys.* **1985**, *83*, 1736-1740.
- [10] Reed, A. E.; Weinstock, R. B.; Weinhold, F. *J. Chem. Phys.* **1985**, *83*, 735-746.
- [11] Reed, A. E.; Curtis, L. A.; Weinhold, F. *Chem. Rev.* **1988**, *88*, 899-926.
- [12] Schleyer, P. v. R.; Maerker, C.; Dransfeld, A.; Jiao, H.; van Eikema Hommes, N. J. R. *J. Am. Chem. Soc.* **1996**, *118*, 6317-6318.
- [13] Frisch, M. J.; Trucks, G. W.; Schlegel, H. B.; Scuseria, G. E.; Robb, M. A.; Cheeseman, J. R.; Scalmani, G.; Barone, V.; Mennucci, B.; Petersson, G. A.; Nakatsuji, H.; Caricato, M.; Li, X.; Hratchian, H. P.; Izmaylov, A. F.; Bloino, J.; Zheng, G.; Sonnenberg, J. L.; Hada, M.; Ehara, M.; Toyota, K.; Fukuda, R.; Hasegawa, J.; Ishida, M.; Nakajima, T.; Honda, Y.; Kitao, O.; Nakai, H.; Vreven, T.; Montgomery, J. A., Jr; Peralta, J. E.; Ogliaro, F.; Bearpark, M.; Heyd, J. J.; Brothers, E.; Kudin, K. N.; Staroverov, V. N.; Keith, T.; Kobayashi, R.; Normand, J.; Raghavachari, K.; Rendell, A.; Burant, J. C.; Iyengar, S. S.; Tomasi, J.; Cossi, M.; Rega, N.; Millam, J. M.; Klene, M.; Knox, J. E.; Cross, J. B.; Bakken, V.; Adamo, C.; Jaramillo, J.; Gomperts, R.; Stratmann, R. E.; Yazyev, O.; Austin, A. J.; Cammi, R.; Pomelli, C.; Ochterski, J. W.; Martin, R. L.; Morokuma, K.; Zakrzewski, V. G.; Voth, G. A.; Salvador, P.; Dannenberg, J. J.; Dapprich, S.; Daniels, A. D.; Farkas, O.; Foresman, J. B.; Ortiz, J. V.; Cioslowski, J.; Fox, D. J. *Gaussian 09, revision B.01.* **2010**.

### Cartesian coordinated of the located minima

- Structure and cartesian coordinates of **C**

|   |            |            |            |
|---|------------|------------|------------|
| H | 16.3243333 | 13.8216582 | -1.6212699 |
| C | 15.8183743 | 13.6352696 | -0.6574199 |
| P | 14.6132183 | 12.3503725 | -0.3925301 |
| C | 14.4483019 | 12.8650509 | 1.3050450  |
| H | 13.7723104 | 12.3859610 | 2.0352988  |
| C | 16.0571132 | 14.3942236 | 0.5046962  |
| C | 15.2801528 | 13.9578712 | 1.6170934  |
| H | 16.7689280 | 15.2401882 | 0.5579468  |
| H | 15.3309370 | 14.4331992 | 2.6153729  |

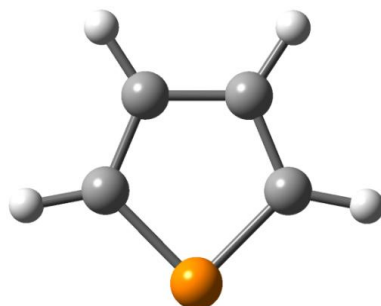

- Structure and cartesian coordinates of **B**

|   |            |            |            |
|---|------------|------------|------------|
| C | 16.2717153 | 13.8349873 | -1.6183325 |
| O | 17.1073083 | 14.7069884 | -1.8929143 |
| C | 15.6449559 | 13.5950662 | -0.3328601 |
| P | 14.4517249 | 12.2980128 | -0.0666195 |
| C | 14.3108430 | 12.7947870 | 1.6393089  |
| C | 13.4303628 | 12.1317874 | 2.5815932  |
| O | 13.2672473 | 12.4101655 | 3.7772565  |
| C | 15.8976818 | 14.3528225 | 0.8582563  |
| C | 15.1577750 | 13.9094593 | 1.9516599  |
| H | 15.9225285 | 13.1158930 | -2.4309387 |
| H | 12.8471280 | 11.2670323 | 2.1213369  |
| H | 16.6089781 | 15.1944892 | 0.8723911  |
| H | 15.1948090 | 14.3459302 | 2.9628296  |

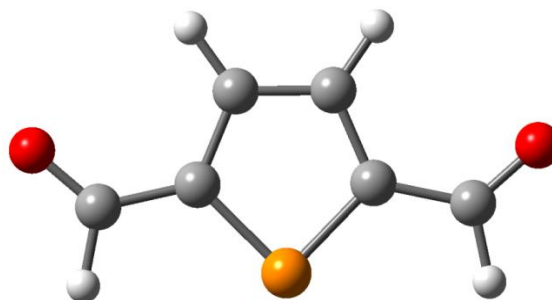

- Structure and cartesian coordinates of **A**

|    |            |            |           |
|----|------------|------------|-----------|
| Fe | 9.5585078  | 9.2700429  | 3.7074028 |
| Fe | 11.8405244 | 17.8773019 | 5.6509362 |
| P  | 9.8925702  | 14.1466897 | 3.1017248 |
| P  | 11.4059333 | 13.0201248 | 6.3250361 |
| P  | 9.5510844  | 11.4736862 | 4.5001449 |
| P  | 11.7732089 | 15.6554898 | 4.9148939 |
| O  | 8.7499109  | 11.2175763 | 0.5941325 |
| O  | 11.7754188 | 9.0398787  | 6.7731721 |
| O  | 9.6489414  | 18.1290257 | 2.5948540 |
| C  | 9.5898530  | 15.7361532 | 2.3626729 |
| C  | 8.9739803  | 15.5876244 | 1.0734275 |
| C  | 8.7670118  | 14.2541910 | 0.7024162 |
| C  | 9.2069068  | 13.3085959 | 1.6903296 |
| C  | 9.1833690  | 11.8453907 | 1.5807314 |
| C  | 9.8521129  | 11.1234463 | 2.7441072 |
| C  | 10.9388323 | 10.2070204 | 2.5501059 |
| C  | 11.5278249 | 9.7683820  | 3.7842405 |
| C  | 10.9063427 | 10.3492797 | 4.9390071 |
| C  | 11.4827798 | 10.1702131 | 6.3380029 |
| C  | 11.7620145 | 11.4301754 | 7.0389449 |
| C  | 12.4114864 | 11.5803484 | 8.3111427 |
| C  | 12.6040335 | 12.9146499 | 8.6879568 |
| C  | 12.1242783 | 13.8600298 | 7.7193139 |
| C  | 12.1374929 | 15.3241191 | 7.8354203 |
| C  | 11.4893363 | 16.0495913 | 6.6635739 |
| C  | 10.4402654 | 17.0113408 | 6.8432109 |
| C  | 9.8569104  | 17.4412452 | 5.6030763 |
| C  | 10.4542226 | 16.8175762 | 4.4578479 |
| C  | 9.8960052  | 16.9954447 | 3.0522874 |
| C  | 8.3455624  | 8.1196755  | 4.8841699 |

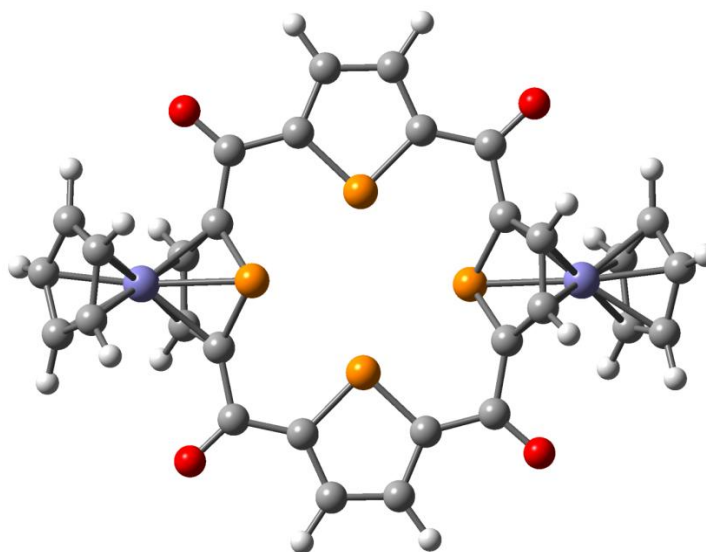

|   |            |            |            |
|---|------------|------------|------------|
| C | 7.5903286  | 8.7176307  | 3.8116779  |
| C | 8.1747408  | 8.2957536  | 2.5630980  |
| C | 9.2827021  | 7.4238067  | 2.8665737  |
| C | 9.3935029  | 7.3190918  | 4.3005574  |
| C | 12.9560918 | 19.1374214 | 6.8121431  |
| C | 13.7977819 | 18.4202885 | 5.8865992  |
| C | 13.3474447 | 18.7186313 | 4.5500809  |
| C | 12.2236915 | 19.6167652 | 4.6465052  |
| C | 11.9882207 | 19.8814150 | 6.0441816  |
| O | 12.5496000 | 15.9503099 | 8.8312965  |
| H | 9.9506675  | 6.9551870  | 2.1309765  |
| H | 10.1672610 | 6.7797216  | 4.8614257  |
| H | 7.8902866  | 8.6610636  | 1.5678711  |
| H | 6.7490625  | 9.4127727  | 3.9259406  |
| H | 8.1831736  | 8.2777592  | 5.9577163  |
| H | 12.3685952 | 9.0613751  | 3.8568946  |
| H | 11.2669012 | 9.8767061  | 1.5525380  |
| H | 12.7244531 | 10.7112716 | 8.9139289  |
| H | 13.0812366 | 13.2339726 | 9.6296841  |
| H | 8.3149881  | 13.9351028 | -0.2516802 |
| H | 8.6993315  | 16.4571383 | 0.4528882  |
| H | 10.1292285 | 17.3723081 | 7.8357041  |
| H | 9.0418973  | 18.1768454 | 5.5202087  |
| H | 14.6082205 | 17.7324805 | 6.1584081  |
| H | 13.0115875 | 19.0661028 | 7.9055662  |
| H | 11.1832493 | 20.5076145 | 6.4521710  |
| H | 11.6010512 | 19.9529075 | 3.8070053  |
| H | 13.7553930 | 18.2966789 | 3.6231949  |

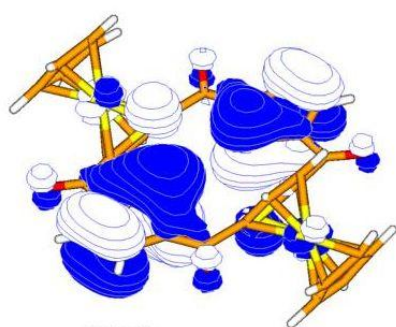

HOMO  
-0.0048 au

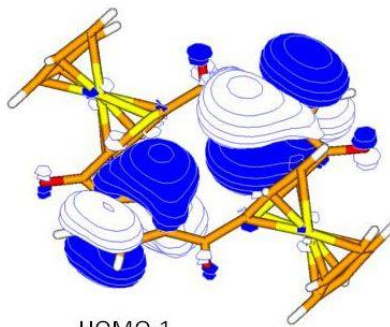

HOMO-1  
-0.0068 au

B3LYP/6-31++G(d,p)//marij-BP86/def2-SVP determined HOMO (left) and HOMO-1 (right) orbitals for macrocycle A.

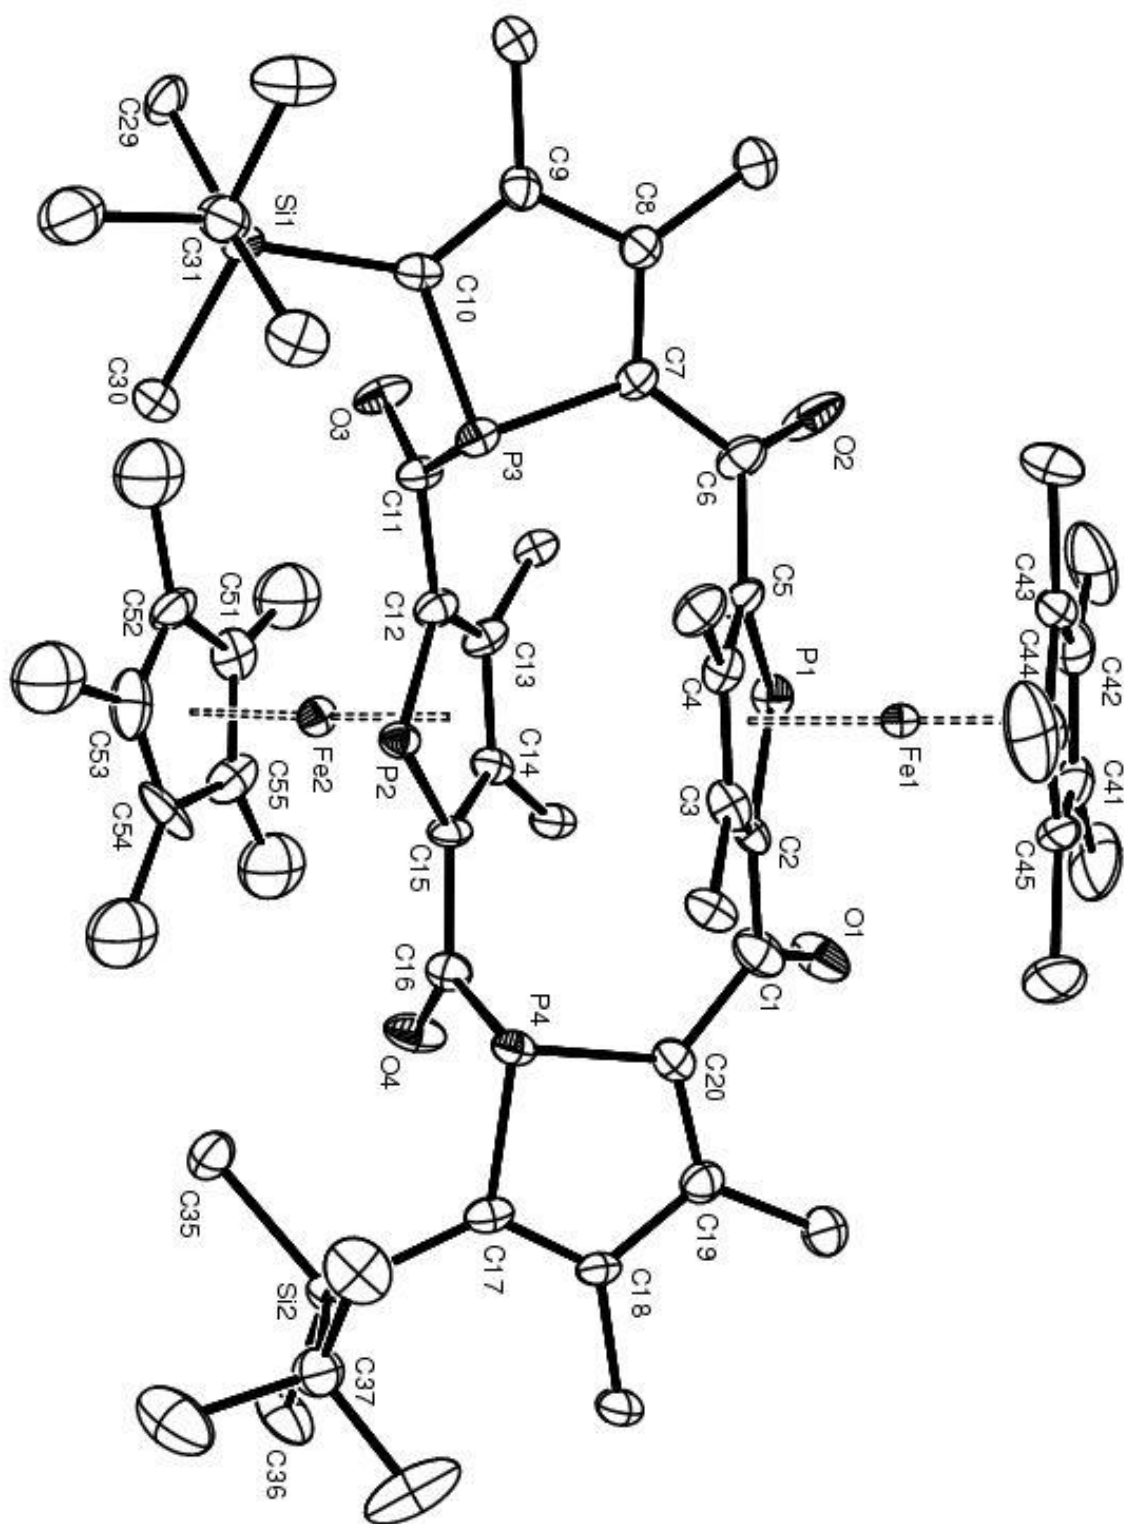

Table 1. Crystal data for **9**

|                                             |                                                                                               |
|---------------------------------------------|-----------------------------------------------------------------------------------------------|
| Compound                                    | em463                                                                                         |
| Molecular formula                           | C <sub>60</sub> H <sub>84</sub> Fe <sub>2</sub> O <sub>4</sub> P <sub>4</sub> Si <sub>2</sub> |
| Molecular weight                            | 580.52                                                                                        |
| Crystal habit                               | Red Plate                                                                                     |
| Crystal dimensions(mm)                      | 0.18x0.16x0.06                                                                                |
| Crystal system                              | orthorhombic                                                                                  |
| Space group                                 | Pca2 <sub>1</sub>                                                                             |
| a(Å)                                        | 23.209(1)                                                                                     |
| b(Å)                                        | 25.099(1)                                                                                     |
| c(Å)                                        | 20.610(1)                                                                                     |
| α(°)                                        | 90.00                                                                                         |
| β(°)                                        | 90.00                                                                                         |
| γ(°)                                        | 90.00                                                                                         |
| V(Å <sup>3</sup> )                          | 12005.8(9)                                                                                    |
| Z                                           | 16                                                                                            |
| d(g-cm <sup>-3</sup> )                      | 1.285                                                                                         |
| F(000)                                      | 4928                                                                                          |
| μ(cm <sup>-1</sup> )                        | 0.674                                                                                         |
| Absorption corrections                      | multi-scan ; 0.8883 min, 0.9607 max                                                           |
| Diffractometer                              | KappaCCD                                                                                      |
| X-ray source                                | MoKα                                                                                          |
| λ(Å)                                        | 0.71069                                                                                       |
| Monochromator                               | graphite                                                                                      |
| T (K)                                       | 150(1)                                                                                        |
| Scan mode                                   | phi and omega scans                                                                           |
| Maximum θ                                   | 27.46                                                                                         |
| HKL ranges                                  | -30 25 ; -32 30 ; -26 19                                                                      |
| Reflections measured                        | 90852                                                                                         |
| Unique data                                 | 25709                                                                                         |
| Rint                                        | 0.0408                                                                                        |
| Reflections used                            | 16505                                                                                         |
| Criterion                                   | I > 2σ(I)                                                                                     |
| Refinement type                             | Fsqd                                                                                          |
| Hydrogen atoms                              | constr                                                                                        |
| Parameters refined                          | 1331                                                                                          |
| Reflections / parameter                     | 12                                                                                            |
| wR2                                         | 0.1730                                                                                        |
| R1                                          | 0.0566                                                                                        |
| Flack's parameter                           | 0.0(4)                                                                                        |
| Weights a, b                                | 0.0974 ; 1.0595                                                                               |
| GoF                                         | 1.036                                                                                         |
| difference peak / hole (e Å <sup>-3</sup> ) | 0.164(0.024) / -0.115(0.024)                                                                  |



Table 2. Atomic Coordinates ( $\text{Å} \times 10^4$ ) and equivalent isotropic displacement parameters ( $\text{Å}^2 \times 10^3$ ) for **9**

| atom   | x          | y         | z        | U (eq) |
|--------|------------|-----------|----------|--------|
| Fe (1) | -12260 (1) | -5034 (1) | 1903 (1) | 25 (1) |
| Fe (2) | -10221 (1) | -5045 (1) | -522 (1) | 30 (1) |
| P (1)  | -12057 (1) | -5061 (1) | 832 (1)  | 32 (1) |
| P (2)  | -10288 (1) | -5046 (1) | 606 (1)  | 28 (1) |
| P (3)  | -10598 (1) | -6324 (1) | 1146 (1) | 31 (1) |
| P (4)  | -10561 (1) | -3761 (1) | 1138 (1) | 31 (1) |
| Si (1) | -9604 (1)  | -7192 (1) | 1080 (1) | 29 (1) |
| Si (2) | -9603 (1)  | -2843 (1) | 1106 (1) | 32 (1) |
| O (1)  | -12234 (2) | -3885 (2) | 791 (2)  | 51 (1) |
| O (2)  | -12308 (2) | -6247 (2) | 926 (3)  | 64 (2) |
| O (3)  | -10566 (3) | -6447 (2) | -181 (3) | 43 (1) |
| O (4)  | -10490 (3) | -3635 (2) | -189 (3) | 50 (1) |
| C (1)  | -11806 (4) | -4002 (3) | 1100 (4) | 47 (2) |
| C (2)  | -11723 (3) | -4555 (3) | 1322 (4) | 29 (2) |
| C (3)  | -11415 (3) | -4774 (3) | 1881 (4) | 35 (2) |
| C (4)  | -11421 (3) | -5337 (3) | 1898 (4) | 32 (2) |
| C (5)  | -11746 (3) | -5553 (3) | 1349 (4) | 32 (2) |
| C (6)  | -11851 (3) | -6126 (3) | 1166 (4) | 39 (2) |
| C (7)  | -11364 (3) | -6497 (3) | 1177 (4) | 31 (2) |
| C (8)  | -11413 (3) | -7040 (3) | 1210 (4) | 32 (2) |
| C (9)  | -10869 (3) | -7322 (3) | 1191 (4) | 32 (2) |
| C (10) | -10387 (4) | -7017 (3) | 1113 (4) | 32 (2) |
| C (11) | -10584 (3) | -6128 (3) | 261 (4)  | 33 (2) |
| C (12) | -10655 (4) | -5533 (3) | 136 (4)  | 33 (2) |
| C (13) | -11040 (3) | -5324 (3) | -348 (3) | 32 (2) |
| C (14) | -11028 (3) | -4751 (3) | -346 (4) | 31 (2) |
| C (15) | -10640 (3) | -4558 (3) | 138 (4)  | 30 (2) |
| C (16) | -10546 (3) | -3967 (3) | 258 (4)  | 36 (2) |
| C (17) | -10383 (4) | -3067 (3) | 1137 (4) | 34 (2) |
| C (18) | -10860 (4) | -2779 (3) | 1239 (4) | 31 (2) |
| C (19) | -11402 (3) | -3075 (3) | 1229 (4) | 36 (2) |
| C (20) | -11323 (3) | -3609 (3) | 1167 (4) | 36 (2) |
| C (21) | -11112 (3) | -4442 (3) | 2388 (4) | 37 (2) |
| C (22) | -11140 (4) | -5649 (3) | 2414 (4) | 41 (2) |
| C (23) | -11964 (3) | -7346 (3) | 1284 (5) | 46 (2) |
| C (24) | -10876 (3) | -7919 (3) | 1232 (5) | 45 (2) |
| C (25) | -11459 (4) | -5655 (3) | -730 (4) | 36 (2) |
| C (26) | -11443 (4) | -4410 (3) | -725 (4) | 39 (2) |
| C (27) | -10890 (4) | -2185 (2) | 1314 (5) | 47 (2) |
| C (28) | -11969 (4) | -2788 (3) | 1304 (5) | 50 (2) |
| C (29) | -9448 (3)  | -7778 (3) | 541 (4)  | 42 (2) |
| C (30) | -9242 (4)  | -6577 (3) | 732 (4)  | 39 (2) |
| C (31) | -9299 (4)  | -7322 (3) | 1918 (5) | 42 (2) |
| C (32) | -9560 (5)  | -7828 (3) | 2227 (6) | 70 (3) |
| C (33) | -8657 (4)  | -7382 (4) | 1894 (5) | 67 (3) |
| C (34) | -9456 (4)  | -6863 (3) | 2352 (4) | 48 (2) |
| C (35) | -9208 (4)  | -3422 (3) | 728 (5)  | 46 (2) |
| C (36) | -9485 (4)  | -2227 (3) | 598 (5)  | 61 (3) |
| C (37) | -9298 (4)  | -2729 (3) | 1950 (5) | 46 (2) |
| C (38) | -9398 (4)  | -3211 (4) | 2360 (4) | 61 (2) |
| C (39) | -8654 (5)  | -2625 (4) | 1912 (6) | 84 (4) |
| C (40) | -9587 (6)  | -2261 (4) | 2283 (6) | 94 (4) |
| C (41) | -13057 (4) | -4689 (3) | 2013 (5) | 47 (2) |
| C (42) | -13115 (4) | -5255 (4) | 1960 (4) | 46 (2) |
| C (43) | -12808 (3) | -5487 (3) | 2474 (5) | 37 (2) |
| C (44) | -12551 (5) | -5067 (2) | 2871 (5) | 39 (2) |
| C (45) | -12726 (4) | -4581 (3) | 2550 (5) | 48 (2) |

|        |            |            |           |         |
|--------|------------|------------|-----------|---------|
| C (46) | -13340 (4) | -4270 (4)  | 1585 (6)  | 107 (4) |
| C (47) | -13462 (4) | -5537 (4)  | 1448 (5)  | 91 (3)  |
| C (48) | -12771 (4) | -6088 (3)  | 2596 (5)  | 74 (3)  |
| C (49) | -12219 (5) | -5144 (4)  | 3446 (5)  | 88 (3)  |
| C (50) | -12552 (5) | -4029 (3)  | 2808 (5)  | 117 (5) |
| C (51) | -10087 (4) | -5254 (3)  | -1478 (4) | 43 (2)  |
| C (52) | -9706 (3)  | -5530 (2)  | -1110 (4) | 50 (2)  |
| C (53) | -9377 (4)  | -5170 (4)  | -775 (4)  | 60 (2)  |
| C (54) | -9544 (4)  | -4657 (4)  | -934 (5)  | 79 (4)  |
| C (55) | -10003 (5) | -4700 (3)  | -1396 (4) | 51 (2)  |
| C (56) | -10519 (4) | -5439 (3)  | -1970 (4) | 102 (1) |
| C (57) | -9657 (4)  | -6136 (3)  | -1171 (4) | 102 (1) |
| C (58) | -8888 (4)  | -5380 (4)  | -323 (4)  | 102 (1) |
| C (59) | -9218 (4)  | -4178 (3)  | -695 (4)  | 102 (1) |
| C (60) | -10250 (4) | -4231 (3)  | -1694 (4) | 102 (1) |
| Fe (3) | -7726 (1)  | -9939 (1)  | 5975 (1)  | 30 (1)  |
| Fe (4) | -9761 (1)  | -9981 (1)  | 3548 (1)  | 26 (1)  |
| P (5)  | -7790 (1)  | -9947 (1)  | 4843 (1)  | 29 (1)  |
| P (6)  | -9560 (1)  | -9932 (1)  | 4618 (1)  | 31 (1)  |
| P (7)  | -8036 (1)  | -11240 (1) | 4320 (1)  | 28 (1)  |
| P (8)  | -8127 (1)  | -8677 (1)  | 4295 (1)  | 31 (1)  |
| Si (3) | -7083 (1)  | -12162 (1) | 4351 (1)  | 31 (1)  |
| Si (4) | -7128 (1)  | -7813 (1)  | 4367 (1)  | 32 (1)  |
| O (5)  | -8107 (2)  | -8547 (2)  | 5613 (3)  | 44 (1)  |
| O (6)  | -7941 (2)  | -11355 (2) | 5641 (3)  | 42 (1)  |
| O (7)  | -9707 (2)  | -11096 (2) | 4699 (3)  | 58 (2)  |
| O (8)  | -9864 (2)  | -8737 (2)  | 4442 (3)  | 57 (1)  |
| C (61) | -8129 (3)  | -8883 (3)  | 5203 (4)  | 31 (2)  |
| C (62) | -8174 (3)  | -9454 (2)  | 5314 (3)  | 24 (2)  |
| C (63) | -8557 (3)  | -9690 (3)  | 5777 (4)  | 28 (2)  |
| C (64) | -8539 (3)  | -10254 (3) | 5779 (4)  | 27 (2)  |
| C (65) | -8128 (3)  | -10468 (3) | 5316 (4)  | 28 (2)  |
| C (66) | -8024 (3)  | -11029 (3) | 5221 (3)  | 28 (2)  |
| C (67) | -7856 (3)  | -11940 (3) | 4319 (4)  | 28 (2)  |
| C (68) | -8345 (3)  | -12236 (3) | 4252 (4)  | 33 (2)  |
| C (69) | -8884 (3)  | -11914 (3) | 4246 (4)  | 34 (2)  |
| C (70) | -8803 (3)  | -11381 (3) | 4314 (3)  | 31 (2)  |
| C (71) | -9276 (3)  | -10986 (2) | 4384 (3)  | 32 (2)  |
| C (72) | -9223 (3)  | -10431 (3) | 4136 (4)  | 35 (2)  |
| C (73) | -8909 (3)  | -10226 (3) | 3584 (4)  | 29 (2)  |
| C (74) | -8942 (3)  | -9664 (3)  | 3561 (4)  | 29 (2)  |
| C (75) | -9269 (3)  | -9440 (3)  | 4079 (4)  | 31 (2)  |
| C (76) | -9372 (3)  | -8887 (3)  | 4256 (3)  | 36 (2)  |
| C (77) | -8888 (3)  | -8493 (3)  | 4259 (4)  | 33 (2)  |
| C (78) | -8941 (3)  | -7950 (3)  | 4221 (4)  | 33 (2)  |
| C (79) | -8390 (3)  | -7664 (3)  | 4255 (4)  | 31 (2)  |
| C (80) | -7906 (3)  | -7981 (3)  | 4322 (4)  | 31 (2)  |
| C (81) | -8968 (3)  | -9366 (3)  | 6187 (4)  | 39 (2)  |
| C (82) | -8919 (3)  | -10601 (3) | 6191 (4)  | 37 (2)  |
| C (83) | -8370 (4)  | -12836 (3) | 4173 (5)  | 53 (2)  |
| C (84) | -9457 (4)  | -12199 (3) | 4196 (4)  | 43 (2)  |
| C (85) | -8604 (3)  | -10563 (3) | 3080 (4)  | 41 (2)  |
| C (86) | -8657 (3)  | -9331 (3)  | 3022 (4)  | 38 (2)  |
| C (87) | -9487 (3)  | -7646 (3)  | 4141 (4)  | 42 (2)  |
| C (88) | -8373 (4)  | -7062 (2)  | 4209 (5)  | 43 (2)  |
| C (89) | -6983 (4)  | -12761 (3) | 4864 (4)  | 55 (3)  |
| C (90) | -6690 (3)  | -11600 (3) | 4726 (5)  | 45 (2)  |
| C (91) | -6781 (4)  | -12303 (3) | 3508 (4)  | 35 (2)  |
| C (92) | -6122 (4)  | -12401 (4) | 3581 (4)  | 56 (2)  |
| C (93) | -7053 (4)  | -12802 (3) | 3219 (4)  | 52 (2)  |
| C (94) | -6873 (4)  | -11815 (3) | 3051 (4)  | 53 (2)  |
| C (95) | -6783 (3)  | -8413 (3)  | 4718 (4)  | 42 (2)  |
| C (96) | -6987 (4)  | -7236 (3)  | 4905 (5)  | 52 (2)  |

|         |            |            |          |         |
|---------|------------|------------|----------|---------|
| C (97)  | -6818 (4)  | -7675 (3)  | 3522 (4) | 38 (2)  |
| C (98)  | -6959 (4)  | -8142 (3)  | 3057 (4) | 58 (3)  |
| C (99)  | -6143 (3)  | -7614 (3)  | 3591 (4) | 50 (2)  |
| C (100) | -7048 (4)  | -7146 (3)  | 3261 (4) | 51 (2)  |
| C (101) | -6873 (3)  | -9750 (3)  | 6202 (4) | 43 (2)  |
| C (102) | -6995 (4)  | -10307 (3) | 6346 (4) | 46 (2)  |
| C (103) | -7463 (5)  | -10293 (3) | 6819 (4) | 55 (3)  |
| C (104) | -7591 (4)  | -9755 (3)  | 6947 (4) | 44 (2)  |
| C (105) | -7226 (3)  | -9434 (2)  | 6572 (3) | 49 (2)  |
| C (106) | -6388 (2)  | -9599 (3)  | 5750 (3) | 59 (2)  |
| C (107) | -6697 (3)  | -10801 (3) | 6129 (4) | 132 (4) |
| C (108) | -7764 (4)  | -10764 (3) | 7169 (4) | 121 (4) |
| C (109) | -8016 (3)  | -9541 (3)  | 7435 (3) | 62 (2)  |
| C (110) | -7161 (3)  | -8839 (2)  | 6594 (3) | 50 (1)  |
| C (111) | -10313 (3) | -9547 (3)  | 2962 (5) | 39 (2)  |
| C (112) | -10045 (6) | -9955 (3)  | 2608 (6) | 48 (3)  |
| C (113) | -10194 (3) | -10458 (3) | 2896 (5) | 47 (2)  |
| C (114) | -10563 (3) | -10335 (3) | 3428 (5) | 44 (2)  |
| C (115) | -10630 (3) | -9797 (3)  | 3464 (4) | 35 (2)  |
| C (116) | -10298 (4) | -8971 (3)  | 2806 (4) | 71 (3)  |
| C (117) | -9708 (5)  | -9887 (3)  | 1968 (5) | 67 (2)  |
| C (118) | -10027 (4) | -10990 (3) | 2635 (4) | 75 (3)  |
| C (119) | -10845 (4) | -10741 (3) | 3868 (4) | 77 (3)  |
| C (120) | -11002 (3) | -9500 (3)  | 3952 (4) | 62 (2)  |

-----  
U(eq) is defined as 1/3 the trace of the Uij tensor.

Table 3. Bond lengths (Å) and angles (deg) for **9**

|                 |           |                 |           |
|-----------------|-----------|-----------------|-----------|
| Fe (1) -C (41)  | 2.055 (8) | Fe (1) -C (42)  | 2.07 (1)  |
| Fe (1) -C (45)  | 2.061 (8) | Fe (1) -C (43)  | 2.072 (8) |
| Fe (1) -C (3)   | 2.066 (8) | Fe (1) -C (4)   | 2.088 (8) |
| Fe (1) -C (2)   | 2.105 (8) | Fe (1) -C (44)  | 2.11 (1)  |
| Fe (1) -C (5)   | 2.103 (8) | Fe (1) -P (1)   | 2.257 (3) |
| Fe (2) -C (54)  | 2.035 (8) | Fe (2) -C (14)  | 2.047 (8) |
| Fe (2) -C (13)  | 2.058 (8) | Fe (2) -C (55)  | 2.062 (8) |
| Fe (2) -C (53)  | 2.051 (8) | Fe (2) -C (51)  | 2.063 (8) |
| Fe (2) -C (15)  | 2.072 (7) | Fe (2) -C (12)  | 2.088 (8) |
| Fe (2) -C (52)  | 2.092 (6) | Fe (2) -P (2)   | 2.331 (3) |
| P (1) -C (5)    | 1.784 (8) | P (1) -C (2)    | 1.798 (7) |
| P (2) -C (15)   | 1.761 (7) | P (2) -C (12)   | 1.777 (8) |
| P (3) -C (10)   | 1.809 (7) | P (3) -C (7)    | 1.830 (8) |
| P (3) -C (11)   | 1.888 (8) | P (4) -C (17)   | 1.790 (7) |
| P (4) -C (20)   | 1.811 (8) | P (4) -C (16)   | 1.89 (1)  |
| Si (1) -C (10)  | 1.872 (8) | Si (1) -C (29)  | 1.879 (7) |
| Si (1) -C (31)  | 1.89 (1)  | Si (1) -C (30)  | 1.899 (8) |
| Si (2) -C (35)  | 1.887 (8) | Si (2) -C (17)  | 1.90 (1)  |
| Si (2) -C (36)  | 1.886 (7) | Si (2) -C (37)  | 1.90 (1)  |
| O (1) -C (1)    | 1.22 (1)  | O (2) -C (6)    | 1.208 (8) |
| O (3) -C (11)   | 1.22 (1)  | O (4) -C (16)   | 1.25 (1)  |
| C (1) -C (2)    | 1.47 (1)  | C (1) -C (20)   | 1.50 (1)  |
| C (2) -C (3)    | 1.46 (1)  | C (3) -C (4)    | 1.41 (1)  |
| C (3) -C (21)   | 1.51 (1)  | C (4) -C (5)    | 1.46 (1)  |
| C (4) -C (22)   | 1.47 (1)  | C (5) -C (6)    | 1.51 (1)  |
| C (6) -C (7)    | 1.47 (1)  | C (7) -C (8)    | 1.37 (1)  |
| C (8) -C (9)    | 1.45 (1)  | C (8) -C (23)   | 1.50 (1)  |
| C (9) -C (10)   | 1.37 (1)  | C (9) -C (24)   | 1.50 (1)  |
| C (11) -C (12)  | 1.52 (1)  | C (12) -C (13)  | 1.44 (1)  |
| C (13) -C (14)  | 1.44 (1)  | C (13) -C (25)  | 1.50 (1)  |
| C (14) -C (15)  | 1.43 (1)  | C (14) -C (26)  | 1.50 (1)  |
| C (15) -C (16)  | 1.52 (1)  | C (17) -C (18)  | 1.34 (1)  |
| C (18) -C (19)  | 1.46 (1)  | C (18) -C (27)  | 1.50 (1)  |
| C (19) -C (20)  | 1.36 (1)  | C (19) -C (28)  | 1.51 (1)  |
| C (21) -H (21A) | 0.9600    | C (21) -H (21B) | 0.9600    |
| C (21) -H (21C) | 0.9600    | C (22) -H (22A) | 0.9600    |
| C (22) -H (22B) | 0.9600    | C (22) -H (22C) | 0.9600    |
| C (23) -H (23A) | 0.9600    | C (23) -H (23B) | 0.9600    |
| C (23) -H (23C) | 0.9600    | C (24) -H (24A) | 0.9600    |
| C (24) -H (24B) | 0.9600    | C (24) -H (24C) | 0.9600    |
| C (25) -H (25A) | 0.9601    | C (25) -H (25B) | 0.9601    |
| C (25) -H (25C) | 0.9600    | C (26) -H (26A) | 0.9601    |
| C (26) -H (26B) | 0.9601    | C (26) -H (26C) | 0.9601    |
| C (27) -H (27A) | 0.9600    | C (27) -H (27B) | 0.9600    |
| C (27) -H (27C) | 0.9600    | C (28) -H (28A) | 0.9600    |
| C (28) -H (28B) | 0.9600    | C (28) -H (28C) | 0.9600    |
| C (29) -H (29A) | 0.9600    | C (29) -H (29B) | 0.9600    |
| C (29) -H (29C) | 0.9600    | C (30) -H (30A) | 0.9600    |
| C (30) -H (30B) | 0.9600    | C (30) -H (30C) | 0.9600    |
| C (31) -C (33)  | 1.50 (1)  | C (31) -C (34)  | 1.50 (1)  |
| C (31) -C (32)  | 1.54 (1)  | C (32) -H (32A) | 0.9600    |
| C (32) -H (32B) | 0.9600    | C (32) -H (32C) | 0.9600    |
| C (33) -H (33A) | 0.9601    | C (33) -H (33B) | 0.9601    |
| C (33) -H (33C) | 0.9601    | C (34) -H (34A) | 0.9602    |
| C (34) -H (34B) | 0.9602    | C (34) -H (34C) | 0.9602    |
| C (35) -H (35A) | 0.9600    | C (35) -H (35B) | 0.9600    |
| C (35) -H (35C) | 0.9600    | C (36) -H (36A) | 0.9600    |
| C (36) -H (36B) | 0.9600    | C (36) -H (36C) | 0.9600    |
| C (37) -C (38)  | 1.50 (1)  | C (37) -C (39)  | 1.52 (1)  |
| C (37) -C (40)  | 1.52 (1)  | C (38) -H (38A) | 0.9603    |
| C (38) -H (38B) | 0.9603    | C (38) -H (38C) | 0.9603    |

|                 |           |                 |           |
|-----------------|-----------|-----------------|-----------|
| C (39) -H (39A) | 0.9601    | C (39) -H (39B) | 0.9601    |
| C (39) -H (39C) | 0.9601    | C (40) -H (40A) | 0.9600    |
| C (40) -H (40B) | 0.9600    | C (40) -H (40C) | 0.9600    |
| C (41) -C (45)  | 1.38 (1)  | C (41) -C (42)  | 1.43 (2)  |
| C (41) -C (46)  | 1.52 (1)  | C (42) -C (43)  | 1.40 (1)  |
| C (42) -C (47)  | 1.50 (1)  | C (43) -C (44)  | 1.46 (1)  |
| C (43) -C (48)  | 1.53 (1)  | C (44) -C (45)  | 1.45 (1)  |
| C (44) -C (49)  | 1.43 (1)  | C (45) -C (50)  | 1.54 (1)  |
| C (46) -H (46A) | 0.9600    | C (46) -H (46B) | 0.9600    |
| C (46) -H (46C) | 0.9600    | C (47) -H (47A) | 0.9600    |
| C (47) -H (47B) | 0.9600    | C (47) -H (47C) | 0.9600    |
| C (48) -H (48A) | 0.9600    | C (48) -H (48B) | 0.9600    |
| C (48) -H (48C) | 0.9600    | C (49) -H (49A) | 0.9600    |
| C (49) -H (49B) | 0.9600    | C (49) -H (49C) | 0.9600    |
| C (50) -H (50A) | 0.9600    | C (50) -H (50B) | 0.9600    |
| C (50) -H (50C) | 0.9600    | C (51) -C (52)  | 1.36 (1)  |
| C (51) -C (55)  | 1.42 (1)  | C (51) -C (56)  | 1.50 (1)  |
| C (52) -C (53)  | 1.37 (1)  | C (52) -C (57)  | 1.53 (1)  |
| C (53) -C (54)  | 1.38 (1)  | C (53) -C (58)  | 1.56 (1)  |
| C (54) -C (55)  | 1.43 (1)  | C (54) -C (59)  | 1.50 (1)  |
| C (55) -C (60)  | 1.45 (1)  | C (56) -H (56A) | 0.9600    |
| C (56) -H (56B) | 0.9600    | C (56) -H (56C) | 0.9600    |
| C (57) -H (57A) | 0.9600    | C (57) -H (57B) | 0.9600    |
| C (57) -H (57C) | 0.9600    | C (58) -H (58A) | 0.9600    |
| C (58) -H (58B) | 0.9600    | C (58) -H (58C) | 0.9600    |
| C (59) -H (59A) | 0.9600    | C (59) -H (59B) | 0.9600    |
| C (59) -H (59C) | 0.9600    | C (60) -H (60A) | 0.9600    |
| C (60) -H (60B) | 0.9600    | C (60) -H (60C) | 0.9600    |
| Fe (3) -C (103) | 2.046 (7) | Fe (3) -C (102) | 2.078 (8) |
| Fe (3) -C (104) | 2.079 (8) | Fe (3) -C (63)  | 2.068 (7) |
| Fe (3) -C (101) | 2.089 (8) | Fe (3) -C (64)  | 2.085 (7) |
| Fe (3) -C (62)  | 2.103 (7) | Fe (3) -C (65)  | 2.115 (7) |
| Fe (3) -C (105) | 2.114 (6) | Fe (3) -P (5)   | 2.338 (3) |
| Fe (4) -C (112) | 2.05 (1)  | Fe (4) -C (113) | 2.062 (8) |
| Fe (4) -C (74)  | 2.060 (7) | Fe (4) -C (73)  | 2.072 (7) |
| Fe (4) -C (72)  | 2.074 (8) | Fe (4) -C (115) | 2.078 (7) |
| Fe (4) -C (111) | 2.071 (8) | Fe (4) -C (114) | 2.080 (8) |
| Fe (4) -C (75)  | 2.083 (7) | Fe (4) -P (6)   | 2.257 (3) |
| P (5) -C (65)   | 1.810 (7) | P (5) -C (62)   | 1.809 (7) |
| P (6) -C (72)   | 1.779 (8) | P (6) -C (75)   | 1.792 (8) |
| P (7) -C (67)   | 1.807 (7) | P (7) -C (70)   | 1.814 (8) |
| P (7) -C (66)   | 1.931 (7) | P (8) -C (80)   | 1.822 (7) |
| P (8) -C (77)   | 1.828 (8) | P (8) -C (61)   | 1.940 (8) |
| Si (3) -C (90)  | 1.847 (8) | Si (3) -C (89)  | 1.85 (1)  |
| Si (3) -C (67)  | 1.879 (7) | Si (3) -C (91)  | 1.90 (1)  |
| Si (4) -C (95)  | 1.851 (8) | Si (4) -C (96)  | 1.85 (1)  |
| Si (4) -C (80)  | 1.856 (8) | Si (4) -C (97)  | 1.92 (1)  |
| O (5) -C (61)   | 1.196 (8) | O (6) -C (66)   | 1.205 (8) |
| O (7) -C (71)   | 1.223 (8) | O (8) -C (76)   | 1.263 (8) |
| C (61) -C (62)  | 1.45 (1)  | C (62) -C (63)  | 1.43 (1)  |
| C (63) -C (64)  | 1.41 (1)  | C (63) -C (81)  | 1.51 (1)  |
| C (64) -C (65)  | 1.45 (1)  | C (64) -C (82)  | 1.50 (1)  |
| C (65) -C (66)  | 1.44 (1)  | C (67) -C (68)  | 1.36 (1)  |
| C (68) -C (69)  | 1.49 (1)  | C (68) -C (83)  | 1.52 (1)  |
| C (69) -C (70)  | 1.36 (1)  | C (69) -C (84)  | 1.51 (1)  |
| C (70) -C (71)  | 1.49 (1)  | C (71) -C (72)  | 1.49 (1)  |
| C (72) -C (73)  | 1.45 (1)  | C (73) -C (74)  | 1.41 (1)  |
| C (73) -C (85)  | 1.51 (1)  | C (74) -C (75)  | 1.42 (1)  |
| C (74) -C (86)  | 1.54 (1)  | C (75) -C (76)  | 1.46 (1)  |
| C (76) -C (77)  | 1.50 (1)  | C (77) -C (78)  | 1.37 (1)  |
| C (78) -C (79)  | 1.47 (1)  | C (78) -C (87)  | 1.49 (1)  |
| C (79) -C (80)  | 1.38 (1)  | C (79) -C (88)  | 1.515 (8) |
| C (81) -H (81A) | 0.9601    | C (81) -H (81B) | 0.9601    |

|                        |           |                        |           |
|------------------------|-----------|------------------------|-----------|
| C (81) -H (81C)        | 0.9601    | C (82) -H (82A)        | 0.9601    |
| C (82) -H (82B)        | 0.9601    | C (82) -H (82C)        | 0.9601    |
| C (83) -H (83A)        | 0.9600    | C (83) -H (83B)        | 0.9600    |
| C (83) -H (83C)        | 0.9600    | C (84) -H (84A)        | 0.9600    |
| C (84) -H (84B)        | 0.9600    | C (84) -H (84C)        | 0.9600    |
| C (85) -H (85A)        | 0.9600    | C (85) -H (85B)        | 0.9600    |
| C (85) -H (85C)        | 0.9600    | C (86) -H (86A)        | 0.9600    |
| C (86) -H (86B)        | 0.9600    | C (86) -H (86C)        | 0.9600    |
| C (87) -H (87A)        | 0.9600    | C (87) -H (87B)        | 0.9600    |
| C (87) -H (87C)        | 0.9600    | C (88) -H (88A)        | 0.9600    |
| C (88) -H (88B)        | 0.9600    | C (88) -H (88C)        | 0.9600    |
| C (89) -H (89A)        | 0.9600    | C (89) -H (89B)        | 0.9600    |
| C (89) -H (89C)        | 0.9600    | C (90) -H (90A)        | 0.9600    |
| C (90) -H (90B)        | 0.9600    | C (90) -H (90C)        | 0.9600    |
| C (91) -C (93)         | 1.52 (1)  | C (91) -C (94)         | 1.56 (1)  |
| C (91) -C (92)         | 1.56 (1)  | C (92) -H (92A)        | 0.9601    |
| C (92) -H (92B)        | 0.9601    | C (92) -H (92C)        | 0.9601    |
| C (93) -H (93A)        | 0.9600    | C (93) -H (93B)        | 0.9600    |
| C (93) -H (93C)        | 0.9600    | C (94) -H (94A)        | 0.9602    |
| C (94) -H (94B)        | 0.9602    | C (94) -H (94C)        | 0.9602    |
| C (95) -H (95A)        | 0.9600    | C (95) -H (95B)        | 0.9600    |
| C (95) -H (95C)        | 0.9600    | C (96) -H (96A)        | 0.9600    |
| C (96) -H (96B)        | 0.9600    | C (96) -H (96C)        | 0.9600    |
| C (97) -C (100)        | 1.53 (1)  | C (97) -C (98)         | 1.55 (1)  |
| C (97) -C (99)         | 1.58 (1)  | C (98) -H (98A)        | 0.9603    |
| C (98) -H (98B)        | 0.9603    | C (98) -H (98C)        | 0.9603    |
| C (99) -H (99A)        | 0.9601    | C (99) -H (99B)        | 0.9601    |
| C (99) -H (99C)        | 0.9601    | C (100) -H (10A)       | 0.9600    |
| C (100) -H (10B)       | 0.9600    | C (100) -H (10C)       | 0.9600    |
| C (101) -C (105)       | 1.37 (1)  | C (101) -C (102)       | 1.46 (1)  |
| C (101) -C (106)       | 1.51 (1)  | C (102) -C (103)       | 1.46 (1)  |
| C (102) -C (107)       | 1.49 (1)  | C (103) -C (104)       | 1.41 (1)  |
| C (103) -C (108)       | 1.55 (1)  | C (104) -C (105)       | 1.40 (1)  |
| C (104) -C (109)       | 1.51 (1)  | C (105) -C (110)       | 1.502 (7) |
| C (106) -H (10D)       | 0.9600    | C (106) -H (10E)       | 0.9600    |
| C (106) -H (10F)       | 0.9600    | C (107) -H (10G)       | 0.9601    |
| C (107) -H (10H)       | 0.9601    | C (107) -H (10I)       | 0.9601    |
| C (108) -H (10J)       | 0.9600    | C (108) -H (10K)       | 0.9600    |
| C (108) -H (10L)       | 0.9600    | C (109) -H (10M)       | 0.9600    |
| C (109) -H (10N)       | 0.9600    | C (109) -H (10O)       | 0.9600    |
| C (110) -H (11A)       | 0.9600    | C (110) -H (11B)       | 0.9600    |
| C (110) -H (11C)       | 0.9600    | C (111) -C (112)       | 1.40 (1)  |
| C (111) -C (115)       | 1.42 (1)  | C (111) -C (116)       | 1.48 (1)  |
| C (112) -C (113)       | 1.44 (1)  | C (112) -C (117)       | 1.54 (2)  |
| C (113) -C (114)       | 1.43 (1)  | C (113) -C (118)       | 1.49 (1)  |
| C (114) -C (115)       | 1.36 (1)  | C (114) -C (119)       | 1.51 (1)  |
| C (115) -C (120)       | 1.52 (1)  | C (116) -H (11D)       | 0.9600    |
| C (116) -H (11E)       | 0.9600    | C (116) -H (11F)       | 0.9600    |
| C (117) -H (11G)       | 0.9600    | C (117) -H (11H)       | 0.9600    |
| C (117) -H (11I)       | 0.9600    | C (118) -H (11J)       | 0.9600    |
| C (118) -H (11K)       | 0.9600    | C (118) -H (11L)       | 0.9600    |
| C (119) -H (11M)       | 0.9600    | C (119) -H (11N)       | 0.9600    |
| C (119) -H (11O)       | 0.9600    | C (120) -H (12A)       | 0.9600    |
| C (120) -H (12B)       | 0.9600    | C (120) -H (12C)       | 0.9600    |
|                        |           |                        |           |
| C (41) -Fe (1) -C (42) | 40.7 (4)  | C (41) -Fe (1) -C (45) | 39.0 (4)  |
| C (42) -Fe (1) -C (45) | 66.9 (3)  | C (41) -Fe (1) -C (43) | 67.4 (3)  |
| C (42) -Fe (1) -C (43) | 39.6 (3)  | C (45) -Fe (1) -C (43) | 67.2 (4)  |
| C (41) -Fe (1) -C (3)  | 136.3 (3) | C (42) -Fe (1) -C (3)  | 176.5 (3) |
| C (45) -Fe (1) -C (3)  | 109.7 (3) | C (43) -Fe (1) -C (3)  | 140.2 (3) |
| C (41) -Fe (1) -C (4)  | 172.8 (4) | C (42) -Fe (1) -C (4)  | 143.0 (3) |
| C (45) -Fe (1) -C (4)  | 133.8 (4) | C (43) -Fe (1) -C (4)  | 112.0 (3) |

|                        |           |                        |           |
|------------------------|-----------|------------------------|-----------|
| C (3) -Fe (1) -C (4)   | 39.8 (4)  | C (41) -Fe (1) -C (2)  | 110.8 (3) |
| C (42) -Fe (1) -C (2)  | 139.0 (4) | C (45) -Fe (1) -C (2)  | 111.3 (3) |
| C (43) -Fe (1) -C (2)  | 178.2 (3) | C (3) -Fe (1) -C (2)   | 41.0 (3)  |
| C (4) -Fe (1) -C (2)   | 69.8 (3)  | C (41) -Fe (1) -C (44) | 67.8 (4)  |
| C (42) -Fe (1) -C (44) | 68.1 (4)  | C (45) -Fe (1) -C (44) | 40.6 (3)  |
| C (43) -Fe (1) -C (44) | 40.9 (3)  | C (3) -Fe (1) -C (44)  | 109.7 (4) |
| C (4) -Fe (1) -C (44)  | 106.8 (4) | C (2) -Fe (1) -C (44)  | 138.6 (3) |
| C (41) -Fe (1) -C (5)  | 146.3 (4) | C (42) -Fe (1) -C (5)  | 114.2 (3) |
| C (45) -Fe (1) -C (5)  | 172.5 (4) | C (43) -Fe (1) -C (5)  | 108.5 (3) |
| C (3) -Fe (1) -C (5)   | 69.3 (3)  | C (4) -Fe (1) -C (5)   | 40.9 (3)  |
| C (2) -Fe (1) -C (5)   | 73.1 (4)  | C (44) -Fe (1) -C (5)  | 132.2 (3) |
| C (41) -Fe (1) -P (1)  | 107.9 (3) | C (42) -Fe (1) -P (1)  | 104.4 (3) |
| C (45) -Fe (1) -P (1)  | 139.3 (3) | C (43) -Fe (1) -P (1)  | 131.9 (3) |
| C (3) -Fe (1) -P (1)   | 77.9 (2)  | C (4) -Fe (1) -P (1)   | 77.9 (2)  |
| C (2) -Fe (1) -P (1)   | 48.5 (2)  | C (44) -Fe (1) -P (1)  | 172.3 (3) |
| C (5) -Fe (1) -P (1)   | 48.2 (2)  | C (54) -Fe (2) -C (14) | 127.5 (4) |
| C (54) -Fe (2) -C (13) | 161.7 (4) | C (14) -Fe (2) -C (13) | 41.0 (4)  |
| C (54) -Fe (2) -C (55) | 40.9 (4)  | C (14) -Fe (2) -C (55) | 103.1 (4) |
| C (13) -Fe (2) -C (55) | 121.5 (4) | C (54) -Fe (2) -C (53) | 39.6 (4)  |
| C (14) -Fe (2) -C (53) | 167.1 (3) | C (13) -Fe (2) -C (53) | 151.0 (4) |
| C (55) -Fe (2) -C (53) | 66.9 (4)  | C (54) -Fe (2) -C (51) | 66.8 (3)  |
| C (14) -Fe (2) -C (51) | 113.5 (3) | C (13) -Fe (2) -C (51) | 102.7 (3) |
| C (55) -Fe (2) -C (51) | 40.1 (4)  | C (53) -Fe (2) -C (51) | 64.8 (4)  |
| C (54) -Fe (2) -C (15) | 110.7 (3) | C (14) -Fe (2) -C (15) | 40.6 (3)  |
| C (13) -Fe (2) -C (15) | 69.6 (3)  | C (55) -Fe (2) -C (15) | 116.1 (3) |
| C (53) -Fe (2) -C (15) | 134.9 (4) | C (51) -Fe (2) -C (15) | 148.0 (3) |
| C (54) -Fe (2) -C (12) | 157.7 (4) | C (14) -Fe (2) -C (12) | 69.8 (3)  |
| C (13) -Fe (2) -C (12) | 40.6 (3)  | C (55) -Fe (2) -C (12) | 158.9 (4) |
| C (53) -Fe (2) -C (12) | 122.5 (3) | C (51) -Fe (2) -C (12) | 123.0 (3) |
| C (15) -Fe (2) -C (12) | 72.1 (3)  | C (54) -Fe (2) -C (52) | 66.1 (3)  |
| C (14) -Fe (2) -C (52) | 146.7 (3) | C (13) -Fe (2) -C (52) | 115.6 (3) |
| C (55) -Fe (2) -C (52) | 66.4 (3)  | C (53) -Fe (2) -C (52) | 38.6 (3)  |
| C (51) -Fe (2) -C (52) | 38.1 (3)  | C (15) -Fe (2) -C (52) | 172.6 (3) |
| C (12) -Fe (2) -C (52) | 108.2 (3) | C (54) -Fe (2) -P (2)  | 117.9 (3) |
| C (14) -Fe (2) -P (2)  | 76.2 (2)  | C (13) -Fe (2) -P (2)  | 76.3 (2)  |
| C (55) -Fe (2) -P (2)  | 152.6 (3) | C (53) -Fe (2) -P (2)  | 108.5 (3) |
| C (51) -Fe (2) -P (2)  | 164.4 (2) | C (15) -Fe (2) -P (2)  | 46.7 (2)  |
| C (12) -Fe (2) -P (2)  | 47.0 (2)  | C (52) -Fe (2) -P (2)  | 128.0 (2) |
| C (5) -P (1) -C (2)    | 88.8 (5)  | C (5) -P (1) -Fe (1)   | 61.4 (3)  |
| C (2) -P (1) -Fe (1)   | 61.3 (3)  | C (15) -P (2) -C (12)  | 87.6 (5)  |
| C (15) -P (2) -Fe (2)  | 58.9 (3)  | C (12) -P (2) -Fe (2)  | 59.3 (3)  |
| C (10) -P (3) -C (7)   | 92.0 (3)  | C (10) -P (3) -C (11)  | 102.1 (3) |
| C (7) -P (3) -C (11)   | 96.5 (3)  | C (17) -P (4) -C (20)  | 91.1 (4)  |
| C (17) -P (4) -C (16)  | 105.1 (4) | C (20) -P (4) -C (16)  | 96.1 (4)  |
| C (10) -Si (1) -C (29) | 113.1 (3) | C (10) -Si (1) -C (31) | 111.8 (4) |
| C (29) -Si (1) -C (31) | 109.4 (4) | C (10) -Si (1) -C (30) | 104.6 (3) |
| C (29) -Si (1) -C (30) | 109.1 (4) | C (31) -Si (1) -C (30) | 108.6 (4) |
| C (35) -Si (2) -C (17) | 104.5 (4) | C (35) -Si (2) -C (36) | 109.3 (5) |
| C (17) -Si (2) -C (36) | 113.6 (4) | C (35) -Si (2) -C (37) | 108.2 (4) |
| C (17) -Si (2) -C (37) | 111.7 (4) | C (36) -Si (2) -C (37) | 109.3 (4) |
| O (1) -C (1) -C (2)    | 119.9 (7) | O (1) -C (1) -C (20)   | 120.0 (7) |
| C (2) -C (1) -C (20)   | 119.5 (7) | C (3) -C (2) -C (1)    | 131.5 (7) |
| C (3) -C (2) -P (1)    | 112.8 (5) | C (1) -C (2) -P (1)    | 115.6 (6) |
| C (3) -C (2) -Fe (1)   | 68.1 (4)  | C (1) -C (2) -Fe (1)   | 129.6 (6) |
| P (1) -C (2) -Fe (1)   | 70.1 (3)  | C (4) -C (3) -C (2)    | 113.0 (5) |
| C (4) -C (3) -C (21)   | 122.6 (5) | C (2) -C (3) -C (21)   | 124.4 (7) |
| C (4) -C (3) -Fe (1)   | 70.9 (3)  | C (2) -C (3) -Fe (1)   | 70.9 (4)  |
| C (21) -C (3) -Fe (1)  | 127.0 (6) | C (3) -C (4) -C (5)    | 110.9 (5) |
| C (3) -C (4) -C (22)   | 123.1 (5) | C (5) -C (4) -C (22)   | 126.0 (7) |
| C (3) -C (4) -Fe (1)   | 69.3 (3)  | C (5) -C (4) -Fe (1)   | 70.1 (4)  |
| C (22) -C (4) -Fe (1)  | 127.1 (6) | C (4) -C (5) -C (6)    | 129.1 (7) |
| C (4) -C (5) -P (1)    | 114.4 (5) | C (6) -C (5) -P (1)    | 116.5 (6) |
| C (4) -C (5) -Fe (1)   | 69.0 (4)  | C (6) -C (5) -Fe (1)   | 129.4 (6) |

|                          |           |                          |           |
|--------------------------|-----------|--------------------------|-----------|
| P (1) -C (5) -Fe (1)     | 70.4 (3)  | O (2) -C (6) -C (7)      | 121.6 (6) |
| O (2) -C (6) -C (5)      | 119.0 (6) | C (7) -C (6) -C (5)      | 118.6 (7) |
| C (8) -C (7) -C (6)      | 124.6 (7) | C (8) -C (7) -P (3)      | 108.7 (6) |
| C (6) -C (7) -P (3)      | 126.6 (5) | C (7) -C (8) -C (9)      | 114.3 (7) |
| C (7) -C (8) -C (23)     | 125.9 (7) | C (9) -C (8) -C (23)     | 119.7 (6) |
| C (10) -C (9) -C (8)     | 116.3 (7) | C (10) -C (9) -C (24)    | 125.1 (7) |
| C (8) -C (9) -C (24)     | 118.6 (7) | C (9) -C (10) -P (3)     | 108.3 (6) |
| C (9) -C (10) -Si (1)    | 131.9 (6) | P (3) -C (10) -Si (1)    | 119.4 (4) |
| O (3) -C (11) -C (12)    | 121.6 (7) | O (3) -C (11) -P (3)     | 123.6 (5) |
| C (12) -C (11) -P (3)    | 114.6 (5) | C (13) -C (12) -C (11)   | 122.8 (7) |
| C (13) -C (12) -P (2)    | 115.2 (5) | C (11) -C (12) -P (2)    | 122.0 (6) |
| C (13) -C (12) -Fe (2)   | 68.6 (4)  | C (11) -C (12) -Fe (2)   | 129.2 (5) |
| P (2) -C (12) -Fe (2)    | 73.7 (3)  | C (14) -C (13) -C (12)   | 110.5 (5) |
| C (14) -C (13) -C (25)   | 124.6 (5) | C (12) -C (13) -C (25)   | 124.3 (6) |
| C (14) -C (13) -Fe (2)   | 69.1 (3)  | C (12) -C (13) -Fe (2)   | 70.8 (5)  |
| C (25) -C (13) -Fe (2)   | 133.9 (5) | C (13) -C (14) -C (15)   | 110.7 (5) |
| C (13) -C (14) -C (26)   | 123.6 (5) | C (15) -C (14) -C (26)   | 124.9 (6) |
| C (13) -C (14) -Fe (2)   | 69.9 (3)  | C (15) -C (14) -Fe (2)   | 70.7 (5)  |
| C (26) -C (14) -Fe (2)   | 134.3 (5) | C (14) -C (15) -C (16)   | 122.4 (6) |
| C (14) -C (15) -P (2)    | 116.0 (5) | C (16) -C (15) -P (2)    | 121.5 (6) |
| C (14) -C (15) -Fe (2)   | 68.8 (4)  | C (16) -C (15) -Fe (2)   | 128.0 (5) |
| P (2) -C (15) -Fe (2)    | 74.4 (3)  | O (4) -C (16) -C (15)    | 123.1 (7) |
| O (4) -C (16) -P (4)     | 121.9 (6) | C (15) -C (16) -P (4)    | 114.9 (5) |
| C (18) -C (17) -P (4)    | 109.6 (6) | C (18) -C (17) -Si (2)   | 129.4 (6) |
| P (4) -C (17) -Si (2)    | 120.6 (4) | C (17) -C (18) -C (19)   | 115.8 (6) |
| C (17) -C (18) -C (27)   | 126.2 (7) | C (19) -C (18) -C (27)   | 117.9 (7) |
| C (20) -C (19) -C (18)   | 112.8 (7) | C (20) -C (19) -C (28)   | 126.7 (8) |
| C (18) -C (19) -C (28)   | 120.5 (6) | C (19) -C (20) -C (1)    | 123.9 (8) |
| C (19) -C (20) -P (4)    | 110.1 (6) | C (1) -C (20) -P (4)     | 126.0 (6) |
| C (3) -C (21) -H (21A)   | 109.4     | C (3) -C (21) -H (21B)   | 109.8     |
| H (21A) -C (21) -H (21B) | 109.5     | C (3) -C (21) -H (21C)   | 109.2     |
| H (21A) -C (21) -H (21C) | 109.5     | H (21B) -C (21) -H (21C) | 109.5     |
| C (4) -C (22) -H (22A)   | 109.1     | C (4) -C (22) -H (22B)   | 109.9     |
| H (22A) -C (22) -H (22B) | 109.5     | C (4) -C (22) -H (22C)   | 109.4     |
| H (22A) -C (22) -H (22C) | 109.5     | H (22B) -C (22) -H (22C) | 109.5     |
| C (8) -C (23) -H (23A)   | 109.4     | C (8) -C (23) -H (23B)   | 109.8     |
| H (23A) -C (23) -H (23B) | 109.5     | C (8) -C (23) -H (23C)   | 109.2     |
| H (23A) -C (23) -H (23C) | 109.5     | H (23B) -C (23) -H (23C) | 109.5     |
| C (9) -C (24) -H (24A)   | 109.2     | C (9) -C (24) -H (24B)   | 109.6     |
| H (24A) -C (24) -H (24B) | 109.5     | C (9) -C (24) -H (24C)   | 109.6     |
| H (24A) -C (24) -H (24C) | 109.5     | H (24B) -C (24) -H (24C) | 109.5     |
| C (13) -C (25) -H (25A)  | 109.5     | C (13) -C (25) -H (25B)  | 109.7     |
| H (25A) -C (25) -H (25B) | 109.5     | C (13) -C (25) -H (25C)  | 109.3     |
| H (25A) -C (25) -H (25C) | 109.5     | H (25B) -C (25) -H (25C) | 109.5     |
| C (14) -C (26) -H (26A)  | 109.6     | C (14) -C (26) -H (26B)  | 109.5     |
| H (26A) -C (26) -H (26B) | 109.5     | C (14) -C (26) -H (26C)  | 109.3     |
| H (26A) -C (26) -H (26C) | 109.5     | H (26B) -C (26) -H (26C) | 109.5     |
| C (18) -C (27) -H (27A)  | 109.2     | C (18) -C (27) -H (27B)  | 109.6     |
| H (27A) -C (27) -H (27B) | 109.5     | C (18) -C (27) -H (27C)  | 109.7     |
| H (27A) -C (27) -H (27C) | 109.5     | H (27B) -C (27) -H (27C) | 109.5     |
| C (19) -C (28) -H (28A)  | 109.2     | C (19) -C (28) -H (28B)  | 109.8     |
| H (28A) -C (28) -H (28B) | 109.5     | C (19) -C (28) -H (28C)  | 109.4     |
| H (28A) -C (28) -H (28C) | 109.5     | H (28B) -C (28) -H (28C) | 109.5     |
| Si (1) -C (29) -H (29A)  | 109.5     | Si (1) -C (29) -H (29B)  | 109.6     |
| H (29A) -C (29) -H (29B) | 109.5     | Si (1) -C (29) -H (29C)  | 109.4     |
| H (29A) -C (29) -H (29C) | 109.5     | H (29B) -C (29) -H (29C) | 109.5     |
| Si (1) -C (30) -H (30A)  | 109.6     | Si (1) -C (30) -H (30B)  | 109.3     |
| H (30A) -C (30) -H (30B) | 109.5     | Si (1) -C (30) -H (30C)  | 109.5     |
| H (30A) -C (30) -H (30C) | 109.5     | H (30B) -C (30) -H (30C) | 109.5     |
| C (33) -C (31) -C (34)   | 109.8 (8) | C (33) -C (31) -C (32)   | 108.7 (8) |
| C (34) -C (31) -C (32)   | 106.9 (8) | C (33) -C (31) -Si (1)   | 111.1 (7) |
| C (34) -C (31) -Si (1)   | 108.6 (6) | C (32) -C (31) -Si (1)   | 111.7 (6) |
| C (31) -C (32) -H (32A)  | 109.4     | C (31) -C (32) -H (32B)  | 109.3     |



|                          |           |                          |           |
|--------------------------|-----------|--------------------------|-----------|
| H (32A) -C (32) -H (32B) | 109.5     | C (31) -C (32) -H (32C)  | 109.7     |
| H (32A) -C (32) -H (32C) | 109.5     | H (32B) -C (32) -H (32C) | 109.5     |
| C (31) -C (33) -H (33A)  | 109.5     | C (31) -C (33) -H (33B)  | 109.0     |
| H (33A) -C (33) -H (33B) | 109.5     | C (31) -C (33) -H (33C)  | 109.9     |
| H (33A) -C (33) -H (33C) | 109.5     | H (33B) -C (33) -H (33C) | 109.4     |
| C (31) -C (34) -H (34A)  | 109.8     | C (31) -C (34) -H (34B)  | 109.0     |
| H (34A) -C (34) -H (34B) | 109.4     | C (31) -C (34) -H (34C)  | 109.7     |
| H (34A) -C (34) -H (34C) | 109.5     | H (34B) -C (34) -H (34C) | 109.5     |
| Si (2) -C (35) -H (35A)  | 109.6     | Si (2) -C (35) -H (35B)  | 109.3     |
| H (35A) -C (35) -H (35B) | 109.5     | Si (2) -C (35) -H (35C)  | 109.6     |
| H (35A) -C (35) -H (35C) | 109.5     | H (35B) -C (35) -H (35C) | 109.5     |
| Si (2) -C (36) -H (36A)  | 109.5     | Si (2) -C (36) -H (36B)  | 109.5     |
| H (36A) -C (36) -H (36B) | 109.5     | Si (2) -C (36) -H (36C)  | 109.4     |
| H (36A) -C (36) -H (36C) | 109.5     | H (36B) -C (36) -H (36C) | 109.5     |
| C (38) -C (37) -C (39)   | 108.7 (8) | C (38) -C (37) -C (40)   | 108 (1)   |
| C (39) -C (37) -C (40)   | 109 (1)   | C (38) -C (37) -Si (2)   | 109.8 (6) |
| C (39) -C (37) -Si (2)   | 110.3 (8) | C (40) -C (37) -Si (2)   | 111.4 (7) |
| C (37) -C (38) -H (38A)  | 109.6     | C (37) -C (38) -H (38B)  | 109.0     |
| H (38A) -C (38) -H (38B) | 109.5     | C (37) -C (38) -H (38C)  | 109.8     |
| H (38A) -C (38) -H (38C) | 109.4     | H (38B) -C (38) -H (38C) | 109.4     |
| C (37) -C (39) -H (39A)  | 109.9     | C (37) -C (39) -H (39B)  | 109.1     |
| H (39A) -C (39) -H (39B) | 109.5     | C (37) -C (39) -H (39C)  | 109.5     |
| H (39A) -C (39) -H (39C) | 109.5     | H (39B) -C (39) -H (39C) | 109.5     |
| C (37) -C (40) -H (40A)  | 109.6     | C (37) -C (40) -H (40B)  | 109.4     |
| H (40A) -C (40) -H (40B) | 109.5     | C (37) -C (40) -H (40C)  | 109.4     |
| H (40A) -C (40) -H (40C) | 109.5     | H (40B) -C (40) -H (40C) | 109.5     |
| C (45) -C (41) -C (42)   | 108.1 (6) | C (45) -C (41) -C (46)   | 125 (1)   |
| C (42) -C (41) -C (46)   | 126.9 (7) | C (45) -C (41) -Fe (1)   | 70.7 (5)  |
| C (42) -C (41) -Fe (1)   | 70.0 (4)  | C (46) -C (41) -Fe (1)   | 128.0 (6) |
| C (43) -C (42) -C (41)   | 107.7 (6) | C (43) -C (42) -C (47)   | 127 (1)   |
| C (41) -C (42) -C (47)   | 124.8 (7) | C (43) -C (42) -Fe (1)   | 70.4 (5)  |
| C (41) -C (42) -Fe (1)   | 69.3 (3)  | C (47) -C (42) -Fe (1)   | 127.0 (6) |
| C (42) -C (43) -C (44)   | 109.4 (7) | C (42) -C (43) -C (48)   | 124.0 (8) |
| C (44) -C (43) -C (48)   | 126.6 (8) | C (42) -C (43) -Fe (1)   | 69.9 (5)  |
| C (44) -C (43) -Fe (1)   | 70.9 (5)  | C (48) -C (43) -Fe (1)   | 126.8 (6) |
| C (45) -C (44) -C (43)   | 104 (1)   | C (45) -C (44) -C (49)   | 130.2 (8) |
| C (43) -C (44) -C (49)   | 126.0 (7) | C (45) -C (44) -Fe (1)   | 68.0 (5)  |
| C (43) -C (44) -Fe (1)   | 68.2 (5)  | C (49) -C (44) -Fe (1)   | 128.2 (8) |
| C (41) -C (45) -C (44)   | 110.9 (7) | C (41) -C (45) -C (50)   | 127 (1)   |
| C (44) -C (45) -C (50)   | 122 (1)   | C (41) -C (45) -Fe (1)   | 70.3 (5)  |
| C (44) -C (45) -Fe (1)   | 71.5 (5)  | C (50) -C (45) -Fe (1)   | 125.7 (6) |
| C (41) -C (46) -H (46A)  | 109.7     | C (41) -C (46) -H (46B)  | 109.3     |
| H (46A) -C (46) -H (46B) | 109.5     | C (41) -C (46) -H (46C)  | 109.4     |
| H (46A) -C (46) -H (46C) | 109.5     | H (46B) -C (46) -H (46C) | 109.5     |
| C (42) -C (47) -H (47A)  | 109.6     | C (42) -C (47) -H (47B)  | 109.2     |
| H (47A) -C (47) -H (47B) | 109.5     | C (42) -C (47) -H (47C)  | 109.7     |
| H (47A) -C (47) -H (47C) | 109.5     | H (47B) -C (47) -H (47C) | 109.5     |
| C (43) -C (48) -H (48A)  | 109.5     | C (43) -C (48) -H (48B)  | 109.5     |
| H (48A) -C (48) -H (48B) | 109.5     | C (43) -C (48) -H (48C)  | 109.4     |
| H (48A) -C (48) -H (48C) | 109.5     | H (48B) -C (48) -H (48C) | 109.5     |
| C (44) -C (49) -H (49A)  | 109.2     | C (44) -C (49) -H (49B)  | 109.6     |
| H (49A) -C (49) -H (49B) | 109.5     | C (44) -C (49) -H (49C)  | 109.6     |
| H (49A) -C (49) -H (49C) | 109.5     | H (49B) -C (49) -H (49C) | 109.5     |
| C (45) -C (50) -H (50A)  | 109.4     | C (45) -C (50) -H (50B)  | 109.5     |
| H (50A) -C (50) -H (50B) | 109.5     | C (45) -C (50) -H (50C)  | 109.5     |
| H (50A) -C (50) -H (50C) | 109.5     | H (50B) -C (50) -H (50C) | 109.5     |
| C (52) -C (51) -C (55)   | 110.2 (6) | C (52) -C (51) -C (56)   | 131.1 (8) |
| C (55) -C (51) -C (56)   | 118.5 (7) | C (52) -C (51) -Fe (2)   | 72.1 (4)  |
| C (55) -C (51) -Fe (2)   | 69.9 (3)  | C (56) -C (51) -Fe (2)   | 128.6 (6) |
| C (53) -C (52) -C (51)   | 108.0 (7) | C (53) -C (52) -C (57)   | 131.0 (8) |
| C (51) -C (52) -C (57)   | 120.6 (8) | C (53) -C (52) -Fe (2)   | 69.1 (4)  |
| C (51) -C (52) -Fe (2)   | 69.8 (4)  | C (57) -C (52) -Fe (2)   | 131.9 (5) |
| C (52) -C (53) -C (54)   | 109.8 (7) | C (52) -C (53) -C (58)   | 119 (1)   |

|                          |           |                          |           |
|--------------------------|-----------|--------------------------|-----------|
| C (54) -C (53) -C (58)   | 131 (1)   | C (52) -C (53) -Fe (2)   | 72.3 (5)  |
| C (54) -C (53) -Fe (2)   | 69.6 (4)  | C (58) -C (53) -Fe (2)   | 126.5 (6) |
| C (53) -C (54) -C (55)   | 107.2 (6) | C (53) -C (54) -C (59)   | 122 (1)   |
| C (55) -C (54) -C (59)   | 131 (1)   | C (53) -C (54) -Fe (2)   | 70.8 (4)  |
| C (55) -C (54) -Fe (2)   | 70.5 (5)  | C (59) -C (54) -Fe (2)   | 129.4 (5) |
| C (51) -C (55) -C (54)   | 104.8 (6) | C (51) -C (55) -C (60)   | 134.0 (8) |
| C (54) -C (55) -C (60)   | 121 (1)   | C (51) -C (55) -Fe (2)   | 70.0 (3)  |
| C (54) -C (55) -Fe (2)   | 68.5 (4)  | C (60) -C (55) -Fe (2)   | 128.1 (6) |
| C (51) -C (56) -H (56A)  | 109.7     | C (51) -C (56) -H (56B)  | 109.5     |
| H (56A) -C (56) -H (56B) | 109.5     | C (51) -C (56) -H (56C)  | 109.2     |
| H (56A) -C (56) -H (56C) | 109.5     | H (56B) -C (56) -H (56C) | 109.5     |
| C (52) -C (57) -H (57A)  | 109.5     | C (52) -C (57) -H (57B)  | 109.5     |
| H (57A) -C (57) -H (57B) | 109.5     | C (52) -C (57) -H (57C)  | 109.4     |
| H (57A) -C (57) -H (57C) | 109.5     | H (57B) -C (57) -H (57C) | 109.5     |
| C (53) -C (58) -H (58A)  | 109.7     | C (53) -C (58) -H (58B)  | 109.5     |
| H (58A) -C (58) -H (58B) | 109.5     | C (53) -C (58) -H (58C)  | 109.3     |
| H (58A) -C (58) -H (58C) | 109.5     | H (58B) -C (58) -H (58C) | 109.5     |
| C (54) -C (59) -H (59A)  | 109.2     | C (54) -C (59) -H (59B)  | 109.6     |
| H (59A) -C (59) -H (59B) | 109.5     | C (54) -C (59) -H (59C)  | 109.6     |
| H (59A) -C (59) -H (59C) | 109.5     | H (59B) -C (59) -H (59C) | 109.5     |
| C (55) -C (60) -H (60A)  | 109.2     | C (55) -C (60) -H (60B)  | 109.5     |
| H (60A) -C (60) -H (60B) | 109.5     | C (55) -C (60) -H (60C)  | 109.7     |
| H (60A) -C (60) -H (60C) | 109.5     | H (60B) -C (60) -H (60C) | 109.5     |
| C (103) -Fe (3) -C (102) | 41.4 (4)  | C (103) -Fe (3) -C (104) | 39.9 (4)  |
| C (102) -Fe (3) -C (104) | 67.7 (3)  | C (103) -Fe (3) -C (63)  | 125.3 (4) |
| C (102) -Fe (3) -C (63)  | 165.6 (3) | C (104) -Fe (3) -C (63)  | 105.3 (3) |
| C (103) -Fe (3) -C (101) | 68.0 (3)  | C (102) -Fe (3) -C (101) | 40.9 (3)  |
| C (104) -Fe (3) -C (101) | 65.8 (3)  | C (63) -Fe (3) -C (101)  | 149.3 (3) |
| C (103) -Fe (3) -C (64)  | 105.7 (3) | C (102) -Fe (3) -C (64)  | 130.0 (3) |
| C (104) -Fe (3) -C (64)  | 114.1 (3) | C (63) -Fe (3) -C (64)   | 39.8 (4)  |
| C (101) -Fe (3) -C (64)  | 170.8 (3) | C (103) -Fe (3) -C (62)  | 161.8 (4) |
| C (102) -Fe (3) -C (62)  | 154.1 (3) | C (104) -Fe (3) -C (62)  | 124.8 (3) |
| C (63) -Fe (3) -C (62)   | 40.1 (3)  | C (101) -Fe (3) -C (62)  | 118.8 (3) |
| C (64) -Fe (3) -C (62)   | 69.3 (3)  | C (103) -Fe (3) -C (65)  | 113.9 (3) |
| C (102) -Fe (3) -C (65)  | 108.5 (3) | C (104) -Fe (3) -C (65)  | 145.5 (3) |
| C (63) -Fe (3) -C (65)   | 69.6 (3)  | C (101) -Fe (3) -C (65)  | 134.7 (3) |
| C (64) -Fe (3) -C (65)   | 40.5 (3)  | C (62) -Fe (3) -C (65)   | 74.3 (3)  |
| C (103) -Fe (3) -C (105) | 66.5 (3)  | C (102) -Fe (3) -C (105) | 66.7 (2)  |
| C (104) -Fe (3) -C (105) | 39.0 (3)  | C (63) -Fe (3) -C (105)  | 116.5 (3) |
| C (101) -Fe (3) -C (105) | 38.1 (3)  | C (64) -Fe (3) -C (105)  | 146.8 (3) |
| C (62) -Fe (3) -C (105)  | 107.5 (2) | C (65) -Fe (3) -C (105)  | 172.7 (3) |
| C (103) -Fe (3) -P (5)   | 149.7 (3) | C (102) -Fe (3) -P (5)   | 114.5 (3) |
| C (104) -Fe (3) -P (5)   | 166.6 (2) | C (63) -Fe (3) -P (5)    | 75.3 (2)  |
| C (101) -Fe (3) -P (5)   | 106.6 (2) | C (64) -Fe (3) -P (5)    | 75.3 (2)  |
| C (62) -Fe (3) -P (5)    | 47.7 (2)  | C (65) -Fe (3) -P (5)    | 47.6 (2)  |
| C (105) -Fe (3) -P (5)   | 128.4 (2) | C (112) -Fe (4) -C (113) | 41.0 (3)  |
| C (112) -Fe (4) -C (74)  | 107.3 (4) | C (113) -Fe (4) -C (74)  | 133.1 (3) |
| C (112) -Fe (4) -C (73)  | 110.6 (4) | C (113) -Fe (4) -C (73)  | 108.4 (3) |
| C (74) -Fe (4) -C (73)   | 40.1 (3)  | C (112) -Fe (4) -C (72)  | 139.9 (4) |
| C (113) -Fe (4) -C (72)  | 110.9 (3) | C (74) -Fe (4) -C (72)   | 69.4 (3)  |
| C (73) -Fe (4) -C (72)   | 40.8 (3)  | C (112) -Fe (4) -C (115) | 66.5 (4)  |
| C (113) -Fe (4) -C (115) | 66.5 (3)  | C (74) -Fe (4) -C (115)  | 144.3 (3) |
| C (73) -Fe (4) -C (115)  | 174.8 (3) | C (72) -Fe (4) -C (115)  | 138.9 (3) |
| C (112) -Fe (4) -C (111) | 39.8 (4)  | C (113) -Fe (4) -C (111) | 67.9 (4)  |
| C (74) -Fe (4) -C (111)  | 112.1 (3) | C (73) -Fe (4) -C (111)  | 140.2 (3) |
| C (72) -Fe (4) -C (111)  | 178.5 (3) | C (115) -Fe (4) -C (111) | 40.0 (3)  |
| C (112) -Fe (4) -C (114) | 67.2 (4)  | C (113) -Fe (4) -C (114) | 40.3 (3)  |
| C (74) -Fe (4) -C (114)  | 173.4 (4) | C (73) -Fe (4) -C (114)  | 137.0 (3) |
| C (72) -Fe (4) -C (114)  | 112.0 (3) | C (115) -Fe (4) -C (114) | 38.2 (4)  |
| C (111) -Fe (4) -C (114) | 66.5 (3)  | C (112) -Fe (4) -C (75)  | 130.7 (3) |
| C (113) -Fe (4) -C (75)  | 171.0 (4) | C (74) -Fe (4) -C (75)   | 40.2 (3)  |
| C (73) -Fe (4) -C (75)   | 69.7 (3)  | C (72) -Fe (4) -C (75)   | 73.7 (4)  |
| C (115) -Fe (4) -C (75)  | 115.5 (3) | C (111) -Fe (4) -C (75)  | 107.6 (3) |

|                          |           |                          |           |
|--------------------------|-----------|--------------------------|-----------|
| C (114) -Fe (4) -C (75)  | 146.2 (4) | C (112) -Fe (4) -P (6)   | 171.5 (3) |
| C (113) -Fe (4) -P (6)   | 140.2 (3) | C (74) -Fe (4) -P (6)    | 77.0 (2)  |
| C (73) -Fe (4) -P (6)    | 77.5 (2)  | C (72) -Fe (4) -P (6)    | 48.3 (2)  |
| C (115) -Fe (4) -P (6)   | 105.6 (3) | C (111) -Fe (4) -P (6)   | 131.9 (3) |
| C (114) -Fe (4) -P (6)   | 108.9 (3) | C (75) -Fe (4) -P (6)    | 48.6 (2)  |
| C (65) -P (5) -C (62)    | 89.5 (4)  | C (65) -P (5) -Fe (3)    | 59.7 (2)  |
| C (62) -P (5) -Fe (3)    | 59.3 (2)  | C (72) -P (6) -C (75)    | 88.5 (5)  |
| C (72) -P (6) -Fe (4)    | 60.5 (3)  | C (75) -P (6) -Fe (4)    | 60.6 (3)  |
| C (67) -P (7) -C (70)    | 92.1 (3)  | C (67) -P (7) -C (66)    | 105.3 (3) |
| C (70) -P (7) -C (66)    | 94.3 (3)  | C (80) -P (8) -C (77)    | 91.8 (3)  |
| C (80) -P (8) -C (61)    | 103.2 (3) | C (77) -P (8) -C (61)    | 96.0 (3)  |
| C (90) -Si (3) -C (89)   | 108.6 (4) | C (90) -Si (3) -C (67)   | 105.0 (3) |
| C (89) -Si (3) -C (67)   | 112.3 (4) | C (90) -Si (3) -C (91)   | 110.0 (4) |
| C (89) -Si (3) -C (91)   | 108.8 (4) | C (67) -Si (3) -C (91)   | 111.9 (4) |
| C (95) -Si (4) -C (96)   | 109.0 (4) | C (95) -Si (4) -C (80)   | 104.9 (4) |
| C (96) -Si (4) -C (80)   | 112.3 (4) | C (95) -Si (4) -C (97)   | 109.8 (4) |
| C (96) -Si (4) -C (97)   | 109.6 (4) | C (80) -Si (4) -C (97)   | 111.1 (4) |
| O (5) -C (61) -C (62)    | 125.9 (7) | O (5) -C (61) -P (8)     | 119.5 (5) |
| C (62) -C (61) -P (8)    | 114.5 (5) | C (63) -C (62) -C (61)   | 124.0 (6) |
| C (63) -C (62) -P (5)    | 112.3 (5) | C (61) -C (62) -P (5)    | 123.6 (5) |
| C (63) -C (62) -Fe (3)   | 68.6 (4)  | C (61) -C (62) -Fe (3)   | 129.6 (5) |
| P (5) -C (62) -Fe (3)    | 73.0 (2)  | C (64) -C (63) -C (62)   | 113.5 (4) |
| C (64) -C (63) -C (81)   | 123.6 (5) | C (62) -C (63) -C (81)   | 122.7 (6) |
| C (64) -C (63) -Fe (3)   | 70.8 (3)  | C (62) -C (63) -Fe (3)   | 71.3 (4)  |
| C (81) -C (63) -Fe (3)   | 129.8 (6) | C (63) -C (64) -C (65)   | 112.7 (5) |
| C (63) -C (64) -C (82)   | 124.4 (5) | C (65) -C (64) -C (82)   | 122.8 (6) |
| C (63) -C (64) -Fe (3)   | 69.4 (3)  | C (65) -C (64) -Fe (3)   | 70.9 (4)  |
| C (82) -C (64) -Fe (3)   | 129.8 (6) | C (64) -C (65) -C (66)   | 124.0 (6) |
| C (64) -C (65) -P (5)    | 111.8 (5) | C (66) -C (65) -P (5)    | 124.1 (6) |
| C (64) -C (65) -Fe (3)   | 68.7 (4)  | C (66) -C (65) -Fe (3)   | 128.7 (5) |
| P (5) -C (65) -Fe (3)    | 72.6 (3)  | O (6) -C (66) -C (65)    | 126.3 (7) |
| O (6) -C (66) -P (7)     | 120.5 (5) | C (65) -C (66) -P (7)    | 113.2 (5) |
| C (68) -C (67) -P (7)    | 109.7 (6) | C (68) -C (67) -Si (3)   | 129.6 (6) |
| P (7) -C (67) -Si (3)    | 120.6 (4) | C (67) -C (68) -C (69)   | 113.9 (6) |
| C (67) -C (68) -C (83)   | 125.7 (8) | C (69) -C (68) -C (83)   | 120.3 (7) |
| C (70) -C (69) -C (68)   | 114.6 (7) | C (70) -C (69) -C (84)   | 126.5 (7) |
| C (68) -C (69) -C (84)   | 118.9 (6) | C (69) -C (70) -C (71)   | 124.3 (7) |
| C (69) -C (70) -P (7)    | 109.3 (6) | C (71) -C (70) -P (7)    | 126.4 (5) |
| O (7) -C (71) -C (70)    | 120.2 (6) | O (7) -C (71) -C (72)    | 117.5 (6) |
| C (70) -C (71) -C (72)   | 122.0 (6) | C (73) -C (72) -C (71)   | 130.1 (7) |
| C (73) -C (72) -P (6)    | 114.2 (5) | C (71) -C (72) -P (6)    | 115.6 (6) |
| C (73) -C (72) -Fe (4)   | 69.5 (4)  | C (71) -C (72) -Fe (4)   | 131.4 (5) |
| P (6) -C (72) -Fe (4)    | 71.2 (3)  | C (74) -C (73) -C (72)   | 110.7 (5) |
| C (74) -C (73) -C (85)   | 124.0 (5) | C (72) -C (73) -C (85)   | 125.3 (7) |
| C (74) -C (73) -Fe (4)   | 69.5 (3)  | C (72) -C (73) -Fe (4)   | 69.7 (4)  |
| C (85) -C (73) -Fe (4)   | 126.0 (5) | C (75) -C (74) -C (73)   | 113.4 (5) |
| C (75) -C (74) -C (86)   | 123.8 (6) | C (73) -C (74) -C (86)   | 122.8 (5) |
| C (75) -C (74) -Fe (4)   | 70.8 (4)  | C (73) -C (74) -Fe (4)   | 70.4 (3)  |
| C (86) -C (74) -Fe (4)   | 126.5 (5) | C (74) -C (75) -C (76)   | 130.6 (7) |
| C (74) -C (75) -P (6)    | 113.2 (5) | C (76) -C (75) -P (6)    | 116.1 (6) |
| C (74) -C (75) -Fe (4)   | 69.0 (4)  | C (76) -C (75) -Fe (4)   | 131.7 (5) |
| P (6) -C (75) -Fe (4)    | 70.8 (3)  | O (8) -C (76) -C (75)    | 120.5 (6) |
| O (8) -C (76) -C (77)    | 118.8 (6) | C (75) -C (76) -C (77)   | 120.6 (6) |
| C (78) -C (77) -C (76)   | 126.2 (7) | C (78) -C (77) -P (8)    | 109.8 (6) |
| C (76) -C (77) -P (8)    | 123.9 (5) | C (77) -C (78) -C (79)   | 114.0 (7) |
| C (77) -C (78) -C (87)   | 126.2 (7) | C (79) -C (78) -C (87)   | 119.8 (6) |
| C (80) -C (79) -C (78)   | 115.5 (6) | C (80) -C (79) -C (88)   | 124.0 (7) |
| C (78) -C (79) -C (88)   | 120.5 (7) | C (79) -C (80) -P (8)    | 108.6 (5) |
| C (79) -C (80) -Si (4)   | 131.7 (5) | P (8) -C (80) -Si (4)    | 119.5 (4) |
| C (63) -C (81) -H (81A)  | 109.8     | C (63) -C (81) -H (81B)  | 109.4     |
| H (81A) -C (81) -H (81B) | 109.5     | C (63) -C (81) -H (81C)  | 109.3     |
| H (81A) -C (81) -H (81C) | 109.5     | H (81B) -C (81) -H (81C) | 109.5     |
| C (64) -C (82) -H (82A)  | 109.3     | C (64) -C (82) -H (82B)  | 109.4     |

|                           |           |                           |           |
|---------------------------|-----------|---------------------------|-----------|
| H (82A) -C (82) -H (82B)  | 109.5     | C (64) -C (82) -H (82C)   | 109.7     |
| H (82A) -C (82) -H (82C)  | 109.5     | H (82B) -C (82) -H (82C)  | 109.5     |
| C (68) -C (83) -H (83A)   | 109.7     | C (68) -C (83) -H (83B)   | 109.4     |
| H (83A) -C (83) -H (83B)  | 109.5     | C (68) -C (83) -H (83C)   | 109.2     |
| H (83A) -C (83) -H (83C)  | 109.5     | H (83B) -C (83) -H (83C)  | 109.5     |
| C (69) -C (84) -H (84A)   | 109.7     | C (69) -C (84) -H (84B)   | 109.1     |
| H (84A) -C (84) -H (84B)  | 109.5     | C (69) -C (84) -H (84C)   | 109.6     |
| H (84A) -C (84) -H (84C)  | 109.5     | H (84B) -C (84) -H (84C)  | 109.5     |
| C (73) -C (85) -H (85A)   | 109.5     | C (73) -C (85) -H (85B)   | 109.1     |
| H (85A) -C (85) -H (85B)  | 109.5     | C (73) -C (85) -H (85C)   | 109.8     |
| H (85A) -C (85) -H (85C)  | 109.5     | H (85B) -C (85) -H (85C)  | 109.5     |
| C (74) -C (86) -H (86A)   | 109.1     | C (74) -C (86) -H (86B)   | 109.5     |
| H (86A) -C (86) -H (86B)  | 109.5     | C (74) -C (86) -H (86C)   | 109.8     |
| H (86A) -C (86) -H (86C)  | 109.5     | H (86B) -C (86) -H (86C)  | 109.5     |
| C (78) -C (87) -H (87A)   | 109.6     | C (78) -C (87) -H (87B)   | 109.1     |
| H (87A) -C (87) -H (87B)  | 109.5     | C (78) -C (87) -H (87C)   | 109.7     |
| H (87A) -C (87) -H (87C)  | 109.5     | H (87B) -C (87) -H (87C)  | 109.5     |
| C (79) -C (88) -H (88A)   | 109.7     | C (79) -C (88) -H (88B)   | 109.3     |
| H (88A) -C (88) -H (88B)  | 109.5     | C (79) -C (88) -H (88C)   | 109.4     |
| H (88A) -C (88) -H (88C)  | 109.5     | H (88B) -C (88) -H (88C)  | 109.5     |
| Si (3) -C (89) -H (89A)   | 109.5     | Si (3) -C (89) -H (89B)   | 109.4     |
| H (89A) -C (89) -H (89B)  | 109.5     | Si (3) -C (89) -H (89C)   | 109.6     |
| H (89A) -C (89) -H (89C)  | 109.5     | H (89B) -C (89) -H (89C)  | 109.5     |
| Si (3) -C (90) -H (90A)   | 109.4     | Si (3) -C (90) -H (90B)   | 109.6     |
| H (90A) -C (90) -H (90B)  | 109.5     | Si (3) -C (90) -H (90C)   | 109.4     |
| H (90A) -C (90) -H (90C)  | 109.5     | H (90B) -C (90) -H (90C)  | 109.5     |
| C (93) -C (91) -C (94)    | 110.6 (8) | C (93) -C (91) -C (92)    | 108.3 (7) |
| C (94) -C (91) -C (92)    | 108.5 (7) | C (93) -C (91) -Si (3)    | 110.9 (6) |
| C (94) -C (91) -Si (3)    | 110.8 (5) | C (92) -C (91) -Si (3)    | 107.6 (6) |
| C (91) -C (92) -H (92A)   | 109.8     | C (91) -C (92) -H (92B)   | 109.4     |
| H (92A) -C (92) -H (92B)  | 109.5     | C (91) -C (92) -H (92C)   | 109.3     |
| H (92A) -C (92) -H (92C)  | 109.5     | H (92B) -C (92) -H (92C)  | 109.5     |
| C (91) -C (93) -H (93A)   | 109.5     | C (91) -C (93) -H (93B)   | 109.3     |
| H (93A) -C (93) -H (93B)  | 109.5     | C (91) -C (93) -H (93C)   | 109.6     |
| H (93A) -C (93) -H (93C)  | 109.5     | H (93B) -C (93) -H (93C)  | 109.5     |
| C (91) -C (94) -H (94A)   | 109.4     | C (91) -C (94) -H (94B)   | 109.9     |
| H (94A) -C (94) -H (94B)  | 109.5     | C (91) -C (94) -H (94C)   | 109.2     |
| H (94A) -C (94) -H (94C)  | 109.5     | H (94B) -C (94) -H (94C)  | 109.4     |
| Si (4) -C (95) -H (95A)   | 109.4     | Si (4) -C (95) -H (95B)   | 109.6     |
| H (95A) -C (95) -H (95B)  | 109.5     | Si (4) -C (95) -H (95C)   | 109.5     |
| H (95A) -C (95) -H (95C)  | 109.5     | H (95B) -C (95) -H (95C)  | 109.5     |
| Si (4) -C (96) -H (96A)   | 109.5     | Si (4) -C (96) -H (96B)   | 109.4     |
| H (96A) -C (96) -H (96B)  | 109.5     | Si (4) -C (96) -H (96C)   | 109.5     |
| H (96A) -C (96) -H (96C)  | 109.5     | H (96B) -C (96) -H (96C)  | 109.5     |
| C (100) -C (97) -C (98)   | 111.4 (8) | C (100) -C (97) -C (99)   | 107.1 (7) |
| C (98) -C (97) -C (99)    | 109.8 (7) | C (100) -C (97) -Si (4)   | 110.2 (6) |
| C (98) -C (97) -Si (4)    | 110.2 (6) | C (99) -C (97) -Si (4)    | 108.0 (6) |
| C (97) -C (98) -H (98A)   | 109.4     | C (97) -C (98) -H (98B)   | 109.2     |
| H (98A) -C (98) -H (98B)  | 109.4     | C (97) -C (98) -H (98C)   | 109.9     |
| H (98A) -C (98) -H (98C)  | 109.5     | H (98B) -C (98) -H (98C)  | 109.4     |
| C (97) -C (99) -H (99A)   | 109.2     | C (97) -C (99) -H (99B)   | 109.3     |
| H (99A) -C (99) -H (99B)  | 109.5     | C (97) -C (99) -H (99C)   | 109.9     |
| H (99A) -C (99) -H (99C)  | 109.5     | H (99B) -C (99) -H (99C)  | 109.5     |
| C (97) -C (100) -H (10A)  | 109.6     | C (97) -C (100) -H (10B)  | 109.3     |
| H (10A) -C (100) -H (10B) | 109.5     | C (97) -C (100) -H (10C)  | 109.5     |
| H (10A) -C (100) -H (10C) | 109.5     | H (10B) -C (100) -H (10C) | 109.5     |
| C (105) -C (101) -C (102) | 109.0 (6) | C (105) -C (101) -C (106) | 130.0 (7) |
| C (102) -C (101) -C (106) | 120.8 (6) | C (105) -C (101) -Fe (3)  | 71.9 (5)  |
| C (102) -C (101) -Fe (3)  | 69.1 (3)  | C (106) -C (101) -Fe (3)  | 128.7 (5) |
| C (101) -C (102) -C (103) | 104.9 (6) | C (101) -C (102) -C (107) | 130.4 (8) |
| C (103) -C (102) -C (107) | 124.6 (8) | C (101) -C (102) -Fe (3)  | 70.0 (3)  |
| C (103) -C (102) -Fe (3)  | 68.1 (5)  | C (107) -C (102) -Fe (3)  | 129.8 (5) |
| C (104) -C (103) -C (102) | 107.8 (6) | C (104) -C (103) -C (108) | 123 (1)   |

|                           |           |                           |           |
|---------------------------|-----------|---------------------------|-----------|
| C (102) -C (103) -C (108) | 128.9 (8) | C (104) -C (103) -Fe (3)  | 71.3 (4)  |
| C (102) -C (103) -Fe (3)  | 70.4 (4)  | C (108) -C (103) -Fe (3)  | 126.2 (6) |
| C (105) -C (104) -C (103) | 108.7 (7) | C (105) -C (104) -C (109) | 123.9 (7) |
| C (103) -C (104) -C (109) | 127.3 (7) | C (105) -C (104) -Fe (3)  | 71.8 (5)  |
| C (103) -C (104) -Fe (3)  | 68.8 (3)  | C (109) -C (104) -Fe (3)  | 128.5 (6) |
| C (101) -C (105) -C (104) | 109.5 (6) | C (101) -C (105) -C (110) | 122.1 (7) |
| C (104) -C (105) -C (110) | 128.0 (7) | C (101) -C (105) -Fe (3)  | 70.0 (4)  |
| C (104) -C (105) -Fe (3)  | 69.2 (4)  | C (110) -C (105) -Fe (3)  | 132.0 (4) |
| C (101) -C (106) -H (10D) | 109.7     | C (101) -C (106) -H (10E) | 109.3     |
| H (10D) -C (106) -H (10E) | 109.5     | C (101) -C (106) -H (10F) | 109.4     |
| H (10D) -C (106) -H (10F) | 109.5     | H (10E) -C (106) -H (10F) | 109.5     |
| C (102) -C (107) -H (10G) | 109.3     | C (102) -C (107) -H (10H) | 109.4     |
| H (10G) -C (107) -H (10H) | 109.5     | C (102) -C (107) -H (10I) | 109.8     |
| H (10G) -C (107) -H (10I) | 109.5     | H (10H) -C (107) -H (10I) | 109.5     |
| C (103) -C (108) -H (10J) | 109.8     | C (103) -C (108) -H (10K) | 109.4     |
| H (10J) -C (108) -H (10K) | 109.5     | C (103) -C (108) -H (10L) | 109.3     |
| H (10J) -C (108) -H (10L) | 109.5     | H (10K) -C (108) -H (10L) | 109.5     |
| C (104) -C (109) -H (10M) | 109.7     | C (104) -C (109) -H (10N) | 109.4     |
| H (10M) -C (109) -H (10N) | 109.5     | C (104) -C (109) -H (10O) | 109.3     |
| H (10M) -C (109) -H (10O) | 109.5     | H (10N) -C (109) -H (10O) | 109.5     |
| C (105) -C (110) -H (11A) | 109.4     | C (105) -C (110) -H (11B) | 109.5     |
| H (11A) -C (110) -H (11B) | 109.5     | C (105) -C (110) -H (11C) | 109.5     |
| H (11A) -C (110) -H (11C) | 109.5     | H (11B) -C (110) -H (11C) | 109.5     |
| C (112) -C (111) -C (115) | 106.6 (8) | C (112) -C (111) -C (116) | 126 (1)   |
| C (115) -C (111) -C (116) | 127.2 (8) | C (112) -C (111) -Fe (4)  | 69.1 (6)  |
| C (115) -C (111) -Fe (4)  | 70.3 (5)  | C (116) -C (111) -Fe (4)  | 128.7 (6) |
| C (111) -C (112) -C (113) | 109 (1)   | C (111) -C (112) -C (117) | 126.0 (7) |
| C (113) -C (112) -C (117) | 124.9 (8) | C (111) -C (112) -Fe (4)  | 71.0 (6)  |
| C (113) -C (112) -Fe (4)  | 70.1 (6)  | C (117) -C (112) -Fe (4)  | 131 (1)   |
| C (114) -C (113) -C (112) | 105.7 (8) | C (114) -C (113) -C (118) | 128.9 (8) |
| C (112) -C (113) -C (118) | 125 (1)   | C (114) -C (113) -Fe (4)  | 70.5 (5)  |
| C (112) -C (113) -Fe (4)  | 68.9 (6)  | C (118) -C (113) -Fe (4)  | 129.0 (5) |
| C (115) -C (114) -C (113) | 109.0 (6) | C (115) -C (114) -C (119) | 125.9 (7) |
| C (113) -C (114) -C (119) | 125.1 (8) | C (115) -C (114) -Fe (4)  | 70.8 (3)  |
| C (113) -C (114) -Fe (4)  | 69.2 (4)  | C (119) -C (114) -Fe (4)  | 127.2 (6) |
| C (114) -C (115) -C (111) | 110.0 (6) | C (114) -C (115) -C (120) | 126.0 (6) |
| C (111) -C (115) -C (120) | 124.0 (7) | C (114) -C (115) -Fe (4)  | 71.0 (3)  |
| C (111) -C (115) -Fe (4)  | 69.8 (4)  | C (120) -C (115) -Fe (4)  | 127.2 (6) |
| C (111) -C (116) -H (11D) | 109.4     | C (111) -C (116) -H (11E) | 109.5     |
| H (11D) -C (116) -H (11E) | 109.5     | C (111) -C (116) -H (11F) | 109.5     |
| H (11D) -C (116) -H (11F) | 109.5     | H (11E) -C (116) -H (11F) | 109.5     |
| C (112) -C (117) -H (11G) | 109.6     | C (112) -C (117) -H (11H) | 109.4     |
| H (11G) -C (117) -H (11H) | 109.5     | C (112) -C (117) -H (11I) | 109.4     |
| H (11G) -C (117) -H (11I) | 109.5     | H (11H) -C (117) -H (11I) | 109.5     |
| C (113) -C (118) -H (11J) | 109.5     | C (113) -C (118) -H (11K) | 109.5     |
| H (11J) -C (118) -H (11K) | 109.5     | C (113) -C (118) -H (11L) | 109.4     |
| H (11J) -C (118) -H (11L) | 109.5     | H (11K) -C (118) -H (11L) | 109.5     |
| C (114) -C (119) -H (11M) | 109.7     | C (114) -C (119) -H (11N) | 109.4     |
| H (11M) -C (119) -H (11N) | 109.5     | C (114) -C (119) -H (11O) | 109.3     |
| H (11M) -C (119) -H (11O) | 109.5     | H (11N) -C (119) -H (11O) | 109.5     |
| C (115) -C (120) -H (12A) | 109.3     | C (115) -C (120) -H (12B) | 109.4     |
| H (12A) -C (120) -H (12B) | 109.5     | C (115) -C (120) -H (12C) | 109.8     |
| H (12A) -C (120) -H (12C) | 109.5     | H (12B) -C (120) -H (12C) | 109.5     |

Table 4. Anisotropic displacement parameters ( $\text{Å}^2 \times 10^3$ ) for **9**

| atom   | U11      | U22    | U33      | U23     | U13     | U12     |
|--------|----------|--------|----------|---------|---------|---------|
| Fe (1) | 27 (1)   | 20 (1) | 30 (1)   | -1 (1)  | 2 (1)   | -1 (1)  |
| Fe (2) | 34 (1)   | 33 (1) | 23 (1)   | 0 (1)   | 2 (1)   | 1 (1)   |
| P (1)  | 30 (1)   | 38 (1) | 29 (1)   | -1 (1)  | -4 (1)  | -1 (1)  |
| P (2)  | 33 (1)   | 25 (1) | 25 (1)   | -1 (1)  | 1 (1)   | -2 (1)  |
| P (3)  | 36 (1)   | 25 (1) | 31 (1)   | -1 (1)  | 0 (1)   | 5 (1)   |
| P (4)  | 38 (1)   | 24 (1) | 31 (1)   | 0 (1)   | 1 (1)   | -6 (1)  |
| Si (1) | 31 (1)   | 22 (1) | 32 (1)   | -2 (1)  | 1 (1)   | 2 (1)   |
| Si (2) | 35 (1)   | 26 (1) | 34 (1)   | 4 (1)   | 0 (1)   | -4 (1)  |
| O (1)  | 42 (3)   | 44 (3) | 67 (3)   | 23 (2)  | -26 (2) | -12 (2) |
| O (2)  | 48 (3)   | 45 (3) | 100 (4)  | -44 (3) | -37 (3) | 22 (2)  |
| O (3)  | 67 (3)   | 27 (2) | 35 (2)   | -10 (2) | -7 (2)  | 12 (2)  |
| O (4)  | 84 (4)   | 33 (2) | 33 (3)   | 4 (2)   | 1 (2)   | -19 (2) |
| C (1)  | 56 (5)   | 47 (4) | 37 (4)   | 10 (3)  | 4 (3)   | -15 (3) |
| C (2)  | 21 (3)   | 34 (3) | 31 (3)   | 1 (2)   | -4 (3)  | -8 (2)  |
| C (3)  | 31 (4)   | 47 (4) | 26 (3)   | 9 (3)   | -3 (3)  | -7 (3)  |
| C (4)  | 30 (4)   | 40 (3) | 26 (3)   | -6 (2)  | -3 (3)  | 5 (3)   |
| C (5)  | 29 (4)   | 30 (3) | 39 (4)   | -8 (3)  | -5 (3)  | 10 (3)  |
| C (6)  | 43 (4)   | 36 (3) | 39 (4)   | -15 (3) | -7 (3)  | 6 (3)   |
| C (7)  | 31 (3)   | 30 (3) | 32 (3)   | -2 (2)  | -3 (3)  | 5 (3)   |
| C (8)  | 36 (4)   | 34 (3) | 26 (3)   | -4 (2)  | 3 (3)   | -1 (3)  |
| C (9)  | 31 (4)   | 35 (3) | 29 (3)   | 7 (2)   | 2 (3)   | 1 (3)   |
| C (10) | 43 (4)   | 23 (3) | 30 (4)   | 2 (3)   | -1 (3)  | -2 (3)  |
| C (11) | 42 (4)   | 21 (3) | 36 (4)   | 1 (2)   | 0 (3)   | 3 (3)   |
| C (12) | 44 (4)   | 28 (3) | 28 (4)   | -1 (3)  | 4 (3)   | 5 (3)   |
| C (13) | 47 (4)   | 30 (3) | 21 (3)   | -3 (2)  | -1 (3)  | 9 (3)   |
| C (14) | 42 (4)   | 30 (4) | 22 (3)   | 0 (3)   | 4 (3)   | -7 (3)  |
| C (15) | 45 (4)   | 17 (3) | 28 (3)   | 5 (2)   | 5 (3)   | -2 (3)  |
| C (16) | 41 (4)   | 29 (3) | 39 (4)   | 3 (3)   | -2 (3)  | -2 (3)  |
| C (17) | 47 (4)   | 23 (3) | 33 (4)   | 0 (3)   | -1 (3)  | 2 (3)   |
| C (18) | 41 (4)   | 21 (3) | 31 (3)   | -5 (2)  | 1 (3)   | -1 (3)  |
| C (19) | 40 (4)   | 35 (4) | 31 (3)   | -5 (3)  | 2 (3)   | 2 (3)   |
| C (20) | 36 (4)   | 37 (3) | 34 (3)   | 2 (3)   | 1 (3)   | -6 (3)  |
| C (21) | 42 (4)   | 34 (3) | 34 (4)   | 2 (3)   | -5 (3)  | -13 (3) |
| C (22) | 42 (5)   | 43 (4) | 38 (4)   | -6 (3)  | -9 (3)  | 15 (3)  |
| C (23) | 28 (4)   | 47 (4) | 62 (4)   | -1 (3)  | 0 (3)   | -4 (3)  |
| C (24) | 33 (4)   | 39 (4) | 64 (5)   | 0 (3)   | 8 (3)   | -6 (3)  |
| C (25) | 43 (5)   | 28 (3) | 39 (4)   | -4 (3)  | 0 (3)   | 5 (3)   |
| C (26) | 49 (5)   | 26 (3) | 40 (5)   | -1 (3)  | 1 (4)   | -5 (3)  |
| C (27) | 38 (4)   | 24 (3) | 79 (5)   | -2 (3)  | 1 (4)   | -4 (3)  |
| C (28) | 32 (4)   | 51 (4) | 66 (5)   | -7 (3)  | -4 (3)  | 0 (3)   |
| C (29) | 32 (4)   | 41 (4) | 53 (5)   | -22 (3) | 1 (4)   | 7 (3)   |
| C (30) | 36 (4)   | 33 (4) | 49 (5)   | 2 (3)   | 3 (3)   | -6 (3)  |
| C (31) | 39 (5)   | 36 (4) | 53 (5)   | 5 (3)   | -6 (4)  | -3 (3)  |
| C (32) | 110 (8)  | 38 (4) | 62 (6)   | 6 (4)   | -7 (5)  | -6 (5)  |
| C (33) | 63 (7)   | 50 (5) | 88 (7)   | -6 (5)  | -11 (6) | 6 (5)   |
| C (34) | 59 (5)   | 51 (4) | 35 (4)   | -6 (3)  | -8 (3)  | -7 (4)  |
| C (35) | 47 (5)   | 43 (4) | 49 (5)   | -6 (3)  | 11 (4)  | 6 (4)   |
| C (36) | 51 (5)   | 49 (5) | 83 (7)   | 48 (4)  | -8 (5)  | -14 (4) |
| C (37) | 38 (5)   | 43 (4) | 57 (5)   | -6 (4)  | -11 (4) | 2 (3)   |
| C (38) | 70 (6)   | 75 (6) | 37 (4)   | 8 (4)   | -12 (4) | -9 (4)  |
| C (39) | 79 (8)   | 71 (7) | 103 (8)  | 31 (6)  | -28 (7) | -24 (6) |
| C (40) | 160 (10) | 62 (6) | 58 (6)   | -18 (4) | -24 (6) | 54 (6)  |
| C (41) | 38 (4)   | 48 (4) | 57 (5)   | 18 (3)  | 15 (4)  | 18 (3)  |
| C (42) | 38 (4)   | 63 (5) | 38 (4)   | -9 (3)  | 7 (3)   | -4 (4)  |
| C (43) | 31 (4)   | 28 (3) | 52 (4)   | 5 (3)   | 7 (3)   | -1 (3)  |
| C (44) | 30 (5)   | 56 (4) | 32 (5)   | 0 (3)   | 5 (4)   | -7 (3)  |
| C (45) | 60 (5)   | 26 (4) | 58 (5)   | -11 (3) | 32 (4)  | -6 (3)  |
| C (46) | 64 (6)   | 91 (7) | 170 (10) | 55 (7)  | 38 (6)  | 47 (5)  |

|        |          |          |          |         |        |         |
|--------|----------|----------|----------|---------|--------|---------|
| C (47) | 43 (5)   | 150 (10) | 84 (6)   | -13 (6) | 2 (4)  | -36 (5) |
| C (48) | 88 (6)   | 31 (3)   | 103 (6)  | 14 (3)  | 28 (5) | -11 (3) |
| C (49) | 60 (6)   | 175 (8)  | 29 (5)   | 0 (6)   | 11 (4) | -20 (7) |
| C (50) | 150 (10) | 64 (6)   | 140 (10) | -67 (6) | 92 (7) | -41 (6) |
| C (51) | 50 (5)   | 64 (5)   | 14 (3)   | -7 (3)  | 4 (3)  | -4 (4)  |
| C (52) | 63 (5)   | 34 (3)   | 53 (4)   | 0 (3)   | 27 (3) | 14 (3)  |
| C (53) | 44 (5)   | 101 (7)  | 36 (4)   | 15 (5)  | 15 (3) | 9 (5)   |
| C (54) | 82 (7)   | 102 (7)  | 54 (6)   | -57 (5) | 55 (5) | -74 (6) |
| C (55) | 79 (6)   | 43 (4)   | 32 (4)   | 17 (3)  | 23 (4) | 22 (4)  |
| C (56) | 124 (3)  | 99 (3)   | 82 (2)   | -6 (2)  | 31 (2) | 0 (3)   |
| C (57) | 124 (3)  | 99 (3)   | 82 (2)   | -6 (2)  | 31 (2) | 0 (3)   |
| C (58) | 124 (3)  | 99 (3)   | 82 (2)   | -6 (2)  | 31 (2) | 0 (3)   |
| C (59) | 124 (3)  | 99 (3)   | 82 (2)   | -6 (2)  | 31 (2) | 0 (3)   |
| C (60) | 124 (3)  | 99 (3)   | 82 (2)   | -6 (2)  | 31 (2) | 0 (3)   |
| Fe (3) | 38 (1)   | 27 (1)   | 25 (1)   | 0 (1)   | -3 (1) | -3 (1)  |
| Fe (4) | 26 (1)   | 25 (1)   | 27 (1)   | -1 (1)  | 1 (1)  | 0 (1)   |
| P (5)  | 38 (1)   | 25 (1)   | 24 (1)   | 0 (1)   | 0 (1)  | -4 (1)  |
| P (6)  | 31 (1)   | 33 (1)   | 29 (1)   | -1 (1)  | 4 (1)  | -3 (1)  |
| P (7)  | 31 (1)   | 22 (1)   | 31 (1)   | -1 (1)  | 0 (1)  | 2 (1)   |
| P (8)  | 38 (1)   | 22 (1)   | 32 (1)   | 1 (1)   | 1 (1)  | -6 (1)  |
| Si (3) | 32 (1)   | 26 (1)   | 36 (1)   | 1 (1)   | -1 (1) | 3 (1)   |
| Si (4) | 34 (1)   | 23 (1)   | 38 (1)   | -1 (1)  | -3 (1) | -2 (1)  |
| O (5)  | 70 (3)   | 28 (2)   | 35 (3)   | -5 (2)  | 1 (2)  | -9 (2)  |
| O (6)  | 63 (3)   | 31 (2)   | 33 (2)   | 5 (2)   | -4 (2) | 3 (2)   |
| O (7)  | 53 (3)   | 47 (3)   | 74 (3)   | 22 (2)  | 28 (3) | 14 (2)  |
| O (8)  | 49 (3)   | 39 (2)   | 83 (4)   | -16 (2) | 20 (3) | -11 (2) |
| C (61) | 33 (4)   | 30 (3)   | 31 (4)   | -5 (2)  | 3 (3)  | -6 (3)  |
| C (62) | 30 (3)   | 20 (3)   | 22 (3)   | -3 (2)  | -2 (3) | -1 (2)  |
| C (63) | 31 (4)   | 19 (3)   | 34 (4)   | 0 (2)   | -1 (3) | 6 (3)   |
| C (64) | 27 (4)   | 22 (3)   | 34 (4)   | -2 (3)  | 0 (3)  | -5 (3)  |
| C (65) | 31 (4)   | 31 (3)   | 23 (3)   | 1 (2)   | -2 (3) | -3 (3)  |
| C (66) | 30 (3)   | 29 (3)   | 26 (3)   | -7 (2)  | -6 (2) | 0 (2)   |
| C (67) | 28 (3)   | 20 (3)   | 35 (4)   | 1 (2)   | -1 (3) | 3 (2)   |
| C (68) | 33 (4)   | 30 (3)   | 37 (4)   | 3 (3)   | 3 (3)  | -2 (3)  |
| C (69) | 30 (4)   | 42 (4)   | 30 (3)   | 4 (3)   | -1 (3) | 0 (3)   |
| C (70) | 34 (3)   | 29 (3)   | 31 (3)   | 5 (2)   | 2 (3)  | 2 (3)   |
| C (71) | 25 (3)   | 31 (3)   | 38 (3)   | 1 (2)   | 8 (3)  | 1 (2)   |
| C (72) | 31 (4)   | 40 (4)   | 33 (3)   | 6 (3)   | -1 (3) | 4 (3)   |
| C (73) | 23 (3)   | 33 (4)   | 31 (3)   | -4 (3)  | -2 (3) | 1 (3)   |
| C (74) | 24 (3)   | 28 (3)   | 33 (4)   | 0 (2)   | -3 (3) | -6 (2)  |
| C (75) | 27 (4)   | 39 (4)   | 27 (3)   | -5 (3)  | -1 (3) | -5 (3)  |
| C (76) | 26 (3)   | 37 (3)   | 43 (4)   | -10 (3) | 14 (3) | -12 (3) |
| C (77) | 35 (4)   | 33 (3)   | 29 (3)   | -3 (3)  | 1 (3)  | -7 (3)  |
| C (78) | 33 (4)   | 28 (3)   | 38 (3)   | 2 (2)   | 1 (3)  | -2 (2)  |
| C (79) | 34 (4)   | 19 (3)   | 40 (4)   | -3 (2)  | -2 (3) | -1 (2)  |
| C (80) | 33 (4)   | 22 (3)   | 39 (4)   | 1 (3)   | -5 (3) | -11 (3) |
| C (81) | 41 (4)   | 38 (4)   | 37 (4)   | -3 (3)  | 14 (3) | 7 (3)   |
| C (82) | 42 (4)   | 34 (4)   | 36 (4)   | 1 (3)   | 14 (3) | -18 (3) |
| C (83) | 55 (5)   | 30 (3)   | 72 (5)   | -12 (3) | 5 (4)  | -14 (3) |
| C (84) | 40 (4)   | 48 (4)   | 42 (4)   | 1 (3)   | -1 (3) | -4 (3)  |
| C (85) | 35 (4)   | 55 (4)   | 32 (4)   | 6 (3)   | 8 (3)  | 15 (3)  |
| C (86) | 33 (4)   | 46 (4)   | 35 (4)   | 2 (3)   | 1 (3)  | -3 (3)  |
| C (87) | 38 (4)   | 43 (4)   | 44 (4)   | 2 (3)   | 1 (3)  | -4 (3)  |
| C (88) | 44 (4)   | 17 (3)   | 68 (5)   | 4 (3)   | -2 (3) | -3 (3)  |
| C (89) | 65 (6)   | 50 (5)   | 50 (5)   | 0 (4)   | -1 (5) | 9 (4)   |
| C (90) | 40 (5)   | 48 (5)   | 48 (5)   | -3 (4)  | -5 (4) | 7 (4)   |
| C (91) | 50 (5)   | 24 (3)   | 30 (4)   | 1 (3)   | 7 (4)  | 6 (3)   |
| C (92) | 38 (5)   | 81 (7)   | 49 (5)   | -4 (4)  | 21 (4) | 14 (4)  |
| C (93) | 63 (5)   | 48 (4)   | 46 (4)   | -25 (3) | 14 (4) | -12 (4) |
| C (94) | 80 (6)   | 38 (4)   | 41 (4)   | 7 (3)   | 17 (4) | -1 (4)  |
| C (95) | 36 (4)   | 49 (5)   | 41 (5)   | 3 (3)   | 0 (3)  | 5 (3)   |
| C (96) | 49 (6)   | 52 (5)   | 54 (5)   | -2 (4)  | -3 (4) | 0 (4)   |
| C (97) | 62 (6)   | 22 (3)   | 32 (4)   | 0 (3)   | 6 (4)  | -1 (3)  |

|         |         |         |         |         |          |          |
|---------|---------|---------|---------|---------|----------|----------|
| C (98)  | 102 (7) | 36 (4)  | 35 (4)  | -2 (3)  | 2 (4)    | -16 (4)  |
| C (99)  | 43 (5)  | 57 (5)  | 49 (5)  | 6 (4)   | 20 (4)   | -3 (4)   |
| C (100) | 66 (5)  | 38 (4)  | 49 (4)  | 22 (3)  | 9 (4)    | 8 (3)    |
| C (101) | 49 (4)  | 37 (3)  | 44 (4)  | 15 (3)  | -18 (3)  | -12 (3)  |
| C (102) | 64 (5)  | 26 (3)  | 49 (4)  | -13 (3) | -33 (4)  | 7 (3)    |
| C (103) | 71 (6)  | 47 (4)  | 47 (5)  | 26 (4)  | -33 (5)  | -28 (4)  |
| C (104) | 50 (5)  | 47 (4)  | 36 (4)  | -11 (3) | -9 (3)   | -8 (3)   |
| C (105) | 68 (5)  | 39 (3)  | 40 (3)  | -10 (3) | -19 (3)  | 7 (3)    |
| C (106) | 33 (3)  | 103 (5) | 41 (3)  | 20 (3)  | -5 (2)   | -7 (3)   |
| C (107) | 133 (7) | 87 (5)  | 177 (8) | -97 (5) | -133 (6) | 95 (5)   |
| C (108) | 173 (8) | 104 (6) | 87 (5)  | 88 (4)  | -87 (5)  | -111 (6) |
| C (109) | 66 (4)  | 91 (5)  | 28 (3)  | -21 (3) | 2 (3)    | -5 (3)   |
| C (110) | 77 (4)  | 28 (3)  | 46 (3)  | 1 (2)   | -23 (3)  | -27 (3)  |
| C (111) | 37 (4)  | 34 (4)  | 44 (4)  | 8 (3)   | -12 (3)  | -1 (3)   |
| C (112) | 32 (6)  | 77 (6)  | 35 (5)  | -2 (3)  | -9 (4)   | -3 (3)   |
| C (113) | 46 (5)  | 36 (4)  | 59 (5)  | -19 (3) | -28 (4)  | 15 (3)   |
| C (114) | 29 (4)  | 53 (4)  | 50 (5)  | 11 (4)  | -6 (4)   | -17 (3)  |
| C (115) | 18 (3)  | 47 (4)  | 40 (4)  | 1 (3)   | -4 (3)   | 2 (3)    |
| C (116) | 82 (6)  | 27 (3)  | 105 (6) | 11 (3)  | -42 (4)  | -13 (3)  |
| C (117) | 41 (5)  | 116 (6) | 43 (5)  | 16 (4)  | 6 (3)    | 0 (4)    |
| C (118) | 103 (7) | 43 (4)  | 77 (5)  | -19 (3) | -40 (5)  | 10 (4)   |
| C (119) | 80 (7)  | 85 (6)  | 64 (5)  | 38 (4)  | -16 (4)  | -50 (5)  |
| C (120) | 44 (4)  | 85 (6)  | 57 (4)  | -26 (4) | 6 (3)    | 15 (4)   |

-----  
The anisotropic displacement factor exponent takes the form  
 $2 \pi^2 [h^2 a^2 U(11) + \dots + 2 h k a^* b^* U(12)]$



Table 5. Hydrogen Coordinates ( $\text{\AA} \times 10^4$ ) and equivalent isotropic displacement parameters ( $\text{\AA}^2 \times 10^3$ ) for **9**

| atom    | x           | y          | z         | U (eq) |
|---------|-------------|------------|-----------|--------|
| H (21A) | -11153.0010 | -4608      | 2805      | 55     |
| H (21B) | -11279      | -4092.0002 | 2399      | 55     |
| H (21C) | -10710      | -4415      | 2281      | 55     |
| H (22A) | -10743.0010 | -5705.9995 | 2304      | 62     |
| H (22B) | -11330      | -5987      | 2457      | 62     |
| H (22C) | -11164      | -5459      | 2816      | 62     |
| H (23A) | -12273      | -7104      | 1383      | 69     |
| H (23B) | -11925      | -7600      | 1629      | 69     |
| H (23C) | -12049      | -7529      | 886       | 69     |
| H (24A) | -10488      | -8051      | 1212      | 68     |
| H (24B) | -11094      | -8061      | 876       | 68     |
| H (24C) | -11049      | -8026.0005 | 1634      | 68     |
| H (25A) | -11289.9990 | -5996      | -823      | 55     |
| H (25B) | -11549      | -5477      | -1130     | 55     |
| H (25C) | -11805      | -5704      | -483.0000 | 55     |
| H (26A) | -11519.9990 | -4575      | -1136     | 58     |
| H (26B) | -11277      | -4065      | -794      | 58     |
| H (26C) | -11796      | -4374      | -486      | 58     |
| H (27A) | -10506.9990 | -2044      | 1354      | 71     |
| H (27B) | -11108      | -2098      | 1694      | 71     |
| H (27C) | -11073      | -2033      | 939       | 71     |
| H (28A) | -12054      | -2597      | 912       | 75     |
| H (28B) | -11944      | -2542      | 1659      | 75     |
| H (28C) | -12268      | -3043      | 1386      | 75     |
| H (29A) | -9606       | -8095      | 731       | 63     |
| H (29B) | -9039       | -7817.9995 | 491       | 63     |
| H (29C) | -9620       | -7720.9995 | 122       | 63     |
| H (30A) | -9381       | -6516      | 299       | 58     |
| H (30B) | -8832       | -6630      | 721       | 58     |
| H (30C) | -9330       | -6274      | 998       | 58     |
| H (32A) | -9361       | -7907.9995 | 2623      | 105    |
| H (32B) | -9520       | -8122      | 1932      | 105    |
| H (32C) | -9961       | -7769      | 2317      | 105    |
| H (33A) | -8490       | -7070      | 1702      | 101    |
| H (33B) | -8560       | -7689      | 1638      | 101    |
| H (33C) | -8511       | -7427      | 2326      | 101    |
| H (34A) | -9866       | -6813      | 2346      | 72     |
| H (34B) | -9271       | -6545      | 2199      | 72     |
| H (34C) | -9332       | -6937      | 2787      | 72     |
| H (35A) | -9318       | -3746      | 942       | 69     |
| H (35B) | -8800       | -3369      | 773       | 69     |
| H (35C) | -9304       | -3445      | 276       | 69     |
| H (36A) | -9080       | -2177      | 528       | 92     |
| H (36B) | -9640       | -1923.0001 | 820       | 92     |
| H (36C) | -9676       | -2269      | 188       | 92     |
| H (38A) | -9242       | -3152      | 2786      | 91     |
| H (38B) | -9212       | -3513      | 2166      | 91     |
| H (38C) | -9804       | -3278      | 2392      | 91     |
| H (39A) | -8508       | -2550      | 2339      | 127    |
| H (39B) | -8583       | -2325      | 1634      | 127    |
| H (39C) | -8463       | -2934      | 1741      | 127    |
| H (40A) | -9978       | -2353      | 2386      | 141    |
| H (40B) | -9584       | -1958.0001 | 1999      | 141    |
| H (40C) | -9383       | -2177      | 2675      | 141    |
| H (46A) | -13656      | -4111      | 1814      | 160    |
| H (46B) | -13479      | -4435      | 1195      | 160    |
| H (46C) | -13063      | -4001      | 1476      | 160    |

|         |             |             |            |     |
|---------|-------------|-------------|------------|-----|
| H (47A) | -13313      | -5890       | 1386       | 137 |
| H (47B) | -13437.9990 | -5343.0005  | 1048       | 137 |
| H (47C) | -13857      | -5558       | 1583       | 137 |
| H (48A) | -13099      | -6200       | 2843       | 111 |
| H (48B) | -12424.9990 | -6167       | 2832       | 111 |
| H (48C) | -12766      | -6273       | 2188       | 111 |
| H (49A) | -12460.0010 | -5091       | 3820       | 132 |
| H (49B) | -11907.0010 | -4893       | 3455       | 132 |
| H (49C) | -12067      | -5500       | 3452       | 132 |
| H (50A) | -12423      | -3811       | 2454       | 176 |
| H (50B) | -12246      | -4068       | 3118       | 176 |
| H (50C) | -12878      | -3865       | 3012       | 176 |
| H (56A) | -10867      | -5236       | -1926      | 153 |
| H (56B) | -10602      | -5809.9995  | -1901      | 153 |
| H (56C) | -10365      | -5391       | -2399      | 153 |
| H (57A) | -9437       | -6224       | -1550      | 153 |
| H (57B) | -10036      | -6287.9995  | -1207      | 153 |
| H (57C) | -9469       | -6276.9995  | -793       | 153 |
| H (58A) | -9053       | -5507       | 75         | 153 |
| H (58B) | -8623       | -5096       | -231       | 153 |
| H (58C) | -8688       | -5666.0005  | -535       | 153 |
| H (59A) | -8903       | -4104       | -983.9999  | 153 |
| H (59B) | -9072       | -4247       | -268       | 153 |
| H (59C) | -9472       | -3876       | -682       | 153 |
| H (60A) | -10059      | -4161       | -2098      | 153 |
| H (60B) | -10203      | -3931       | -1410      | 153 |
| H (60C) | -10653      | -4290       | -1773.0001 | 153 |
| H (81A) | -9315       | -9301       | 5947       | 58  |
| H (81B) | -8791       | -9033       | 6298       | 58  |
| H (81C) | -9058       | -9559       | 6576       | 58  |
| H (82A) | -9002       | -10423      | 6592       | 56  |
| H (82B) | -8725       | -10931      | 6279       | 56  |
| H (82C) | -9273       | -10671.9990 | 5965       | 56  |
| H (83A) | -7991       | -12983      | 4230       | 79  |
| H (83B) | -8508       | -12922      | 3746       | 79  |
| H (83C) | -8625       | -12984      | 4491       | 79  |
| H (84A) | -9511       | -12421      | 4571       | 65  |
| H (84B) | -9462       | -12416      | 3811       | 65  |
| H (84C) | -9763       | -11942      | 4174       | 65  |
| H (85A) | -8687       | -10427.0010 | 2655       | 61  |
| H (85B) | -8735       | -10925      | 3111       | 61  |
| H (85C) | -8196       | -10551      | 3155       | 61  |
| H (86A) | -8841       | -8989       | 2996       | 57  |
| H (86B) | -8697       | -9513       | 2614       | 57  |
| H (86C) | -8256       | -9284       | 3119       | 57  |
| H (87A) | -9805       | -7889.9995  | 4120       | 63  |
| H (87B) | -9471       | -7440.9995  | 3748       | 63  |
| H (87C) | -9538       | -7411       | 4504       | 63  |
| H (88A) | -7992       | -6937.9995  | 4312       | 64  |
| H (88B) | -8644       | -6912       | 4510       | 64  |
| H (88C) | -8471       | -6954       | 3776       | 64  |
| H (89A) | -6957       | -12656      | 5310       | 83  |
| H (89B) | -6634       | -12940      | 4739       | 83  |
| H (89C) | -7304.0005  | -12997      | 4808       | 83  |
| H (90A) | -6830.0005  | -11270      | 4550       | 68  |
| H (90B) | -6286       | -11634.0010 | 4635       | 68  |
| H (90C) | -6751.0005  | -11604      | 5186       | 68  |
| H (92A) | -6059       | -12697.0010 | 3867       | 84  |
| H (92B) | -5942.9995  | -12088      | 3757       | 84  |
| H (92C) | -5959       | -12479      | 3163       | 84  |
| H (93A) | -6901       | -12861      | 2791       | 78  |
| H (93B) | -7463       | -12757      | 3194       | 78  |
| H (93C) | -6966       | -13103      | 3489       | 78  |

|         |             |             |      |     |
|---------|-------------|-------------|------|-----|
| H (94A) | -6696       | -11884      | 2639 | 80  |
| H (94B) | -6702       | -11504      | 3242 | 80  |
| H (94C) | -7278       | -11756.0010 | 2990 | 80  |
| H (95A) | -6918       | -8464       | 5154 | 63  |
| H (95B) | -6372       | -8366       | 4721 | 63  |
| H (95C) | -6880       | -8719       | 4461 | 63  |
| H (96A) | -7318       | -7007       | 4909 | 77  |
| H (96B) | -6659       | -7043       | 4748 | 77  |
| H (96C) | -6912       | -7361       | 5337 | 77  |
| H (98A) | -6772       | -8083       | 2648 | 86  |
| H (98B) | -7368       | -8161       | 2992 | 86  |
| H (98C) | -6824       | -8470       | 3242 | 86  |
| H (99A) | -5978       | -7543       | 3173 | 75  |
| H (99B) | -5984       | -7937       | 3763 | 75  |
| H (99C) | -6057.9995  | -7324       | 3879 | 75  |
| H (10A) | -6960       | -6866.0005  | 3563 | 77  |
| H (10B) | -7458       | -7170       | 3206 | 77  |
| H (10C) | -6871       | -7070       | 2851 | 77  |
| H (10D) | -6075       | -9454       | 5996 | 88  |
| H (10E) | -6523       | -9337       | 5446 | 88  |
| H (10F) | -6258.9995  | -9909       | 5519 | 88  |
| H (10G) | -6612       | -10775      | 5674 | 199 |
| H (10H) | -6941       | -11102.9990 | 6205 | 199 |
| H (10I) | -6344       | -10843      | 6366 | 199 |
| H (10J) | -7500       | -10927      | 7465 | 182 |
| H (10K) | -7887       | -11022      | 6854 | 182 |
| H (10L) | -8093       | -10634      | 7403 | 182 |
| H (10M) | -7827       | -9496       | 7846 | 92  |
| H (10N) | -8330       | -9787       | 7481 | 92  |
| H (10O) | -8160       | -9203       | 7289 | 92  |
| H (11A) | -7531       | -8675       | 6538 | 76  |
| H (11B) | -6907       | -8726       | 6253 | 76  |
| H (11C) | -7003       | -8736       | 7006 | 76  |
| H (11D) | -10614.0010 | -8884       | 2524 | 107 |
| H (11E) | -9941       | -8887       | 2593 | 107 |
| H (11F) | -10329      | -8767       | 3199 | 107 |
| H (11G) | -9956       | -9968       | 1608 | 100 |
| H (11H) | -9384       | -10124      | 1965 | 100 |
| H (11I) | -9576       | -9526       | 1931 | 100 |
| H (11J) | -9810       | -11181      | 2956 | 112 |
| H (11K) | -9795       | -10944      | 2253 | 112 |
| H (11L) | -10368      | -11188      | 2527 | 112 |
| H (11M) | -10774      | -10648      | 4313 | 115 |
| H (11N) | -10687      | -11087      | 3782 | 115 |
| H (11O) | -11253.0010 | -10746      | 3789 | 115 |
| H (12A) | -11384      | -9458       | 3780 | 93  |
| H (12B) | -10836.9990 | -9155       | 4034 | 93  |
| H (12C) | -11019      | -9698       | 4350 | 93  |

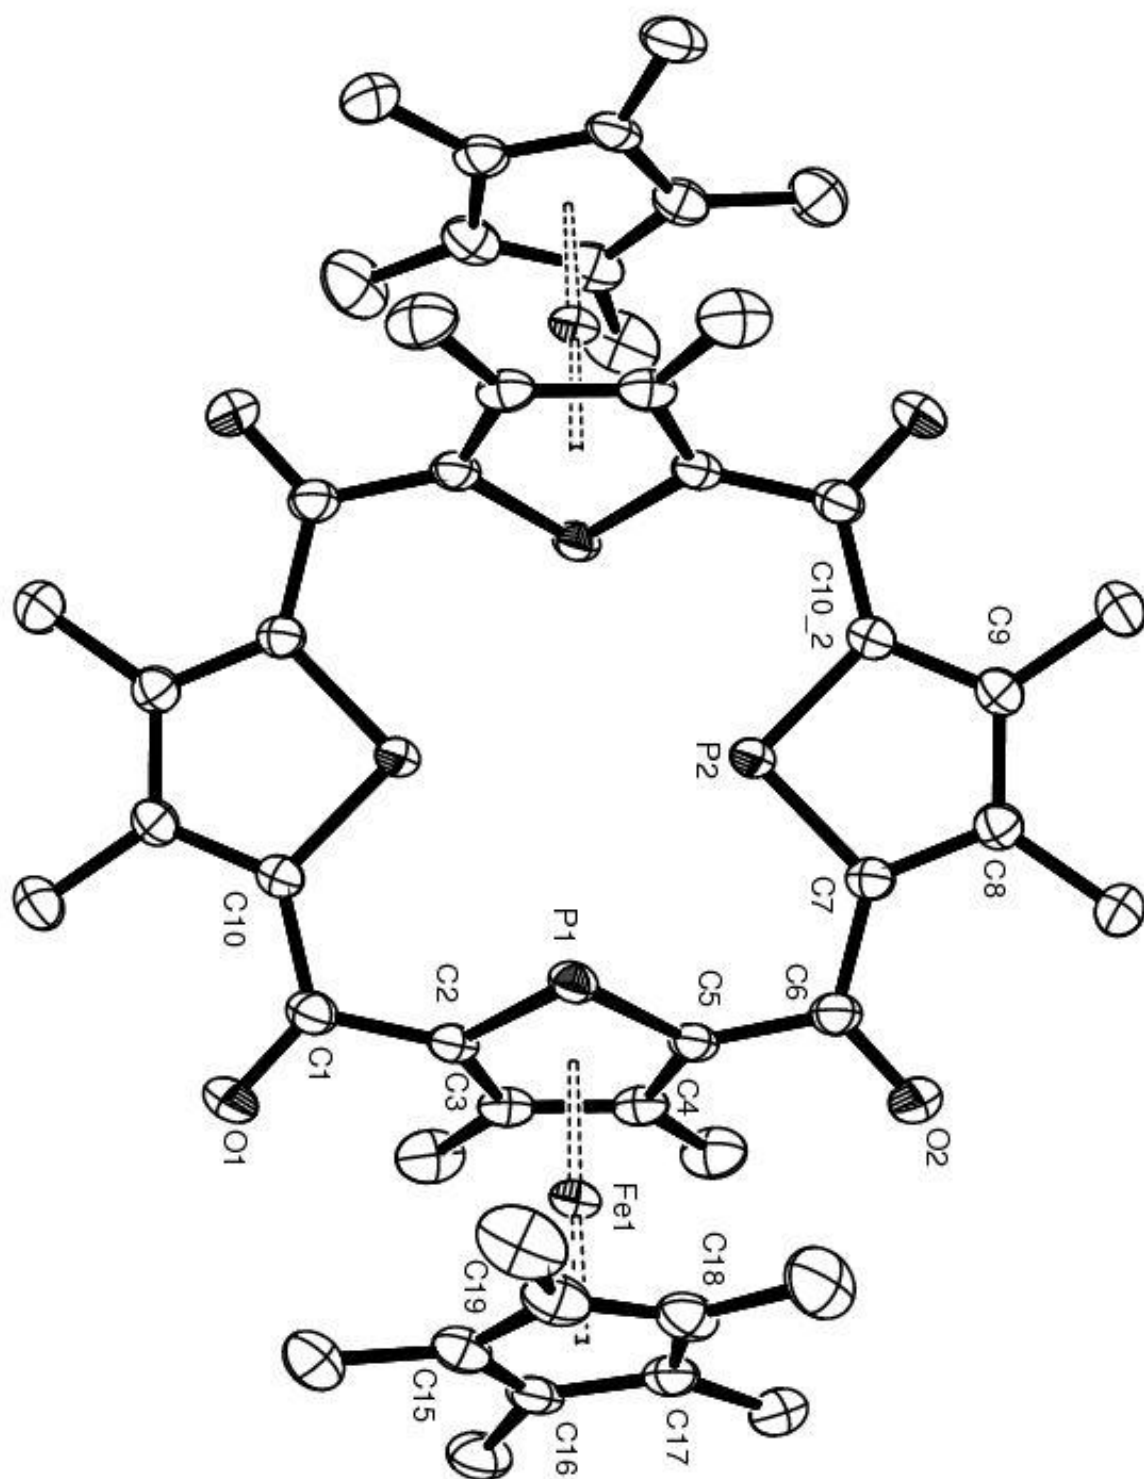

Table 1. Crystal data for **10**

|                                             |                                                                        |
|---------------------------------------------|------------------------------------------------------------------------|
| Compound                                    | em485                                                                  |
| Molecular formula                           | $C_{48}H_{54}Fe_2O_4P_4 \cdot 2(C_{16}H_{30}KN_2O_6) \cdot 2(C_2H_3N)$ |
| Molecular weight                            | 1783.64                                                                |
| Crystal habit                               | Red Block                                                              |
| Crystal dimensions(mm)                      | 0.40x0.30x0.26                                                         |
| Crystal system                              | triclinic                                                              |
| Space group                                 | P-1                                                                    |
| a(Å)                                        | 13.995(1)                                                              |
| b(Å)                                        | 14.050(1)                                                              |
| c(Å)                                        | 14.447(1)                                                              |
| $\alpha(^{\circ})$                          | 108.305(1)                                                             |
| $\beta(^{\circ})$                           | 106.230(1)                                                             |
| $\gamma(^{\circ})$                          | 109.092(1)                                                             |
| V(Å <sup>3</sup> )                          | 2305.8(3)                                                              |
| Z                                           | 1                                                                      |
| d(g-cm <sup>-3</sup> )                      | 1.285                                                                  |
| F(000)                                      | 944                                                                    |
| $\mu$ (cm <sup>-1</sup> )                   | 0.538                                                                  |
| Absorption corrections                      | multi-scan ; 0.8137 min, 0.8728 max                                    |
| Diffractometer                              | KappaCCD                                                               |
| X-ray source                                | MoK $\alpha$                                                           |
| $\lambda$ (Å)                               | 0.71069                                                                |
| Monochromator                               | graphite                                                               |
| T (K)                                       | 150.0(1)                                                               |
| Scan mode                                   | phi and omega scans                                                    |
| Maximum $\theta$                            | 29.97                                                                  |
| HKL ranges                                  | -19 17 ; -19 19 ; -19 20                                               |
| Reflections measured                        | 28523                                                                  |
| Unique data                                 | 13331                                                                  |
| Rint                                        | 0.0214                                                                 |
| Reflections used                            | 10339                                                                  |
| Criterion                                   | $I > 2\sigma(I)$                                                       |
| Refinement type                             | Fsqd                                                                   |
| Hydrogen atoms                              | constr                                                                 |
| Parameters refined                          | 526                                                                    |
| Reflections / parameter                     | 19                                                                     |
| wR2                                         | 0.0999                                                                 |
| R1                                          | 0.0358                                                                 |
| Weights a, b                                | 0.0498 ; 0.1565                                                        |
| GoF                                         | 1.059                                                                  |
| difference peak / hole (e Å <sup>-3</sup> ) | 0.580(0.051) / -0.414(0.051)                                           |

Table 2. Atomic Coordinates ( $\text{Å} \times 10^4$ ) and equivalent isotropic displacement parameters ( $\text{Å}^2 \times 10^3$ ) for **10**

| atom   | x         | y         | z         | U(eq)  |
|--------|-----------|-----------|-----------|--------|
| Fe (1) | 6549 (1)  | 3560 (1)  | 2718 (1)  | 22 (1) |
| P (1)  | 5301 (1)  | 1824 (1)  | 1306 (1)  | 24 (1) |
| P (2)  | 5155 (1)  | 599 (1)   | -951 (1)  | 24 (1) |
| O (1)  | 6168 (1)  | 1615 (1)  | 4020 (1)  | 47 (1) |
| O (2)  | 6939 (1)  | 3910 (1)  | 372 (1)   | 43 (1) |
| C (1)  | 5897 (1)  | 1180 (1)  | 3037 (1)  | 28 (1) |
| C (2)  | 6222 (1)  | 1902 (1)  | 2488 (1)  | 25 (1) |
| C (3)  | 7370 (1)  | 2594 (1)  | 2787 (1)  | 26 (1) |
| C (4)  | 7515 (1)  | 3046 (1)  | 2046 (1)  | 27 (1) |
| C (5)  | 6468 (1)  | 2698 (1)  | 1194 (1)  | 25 (1) |
| C (6)  | 6391 (1)  | 2944 (1)  | 235 (1)   | 28 (1) |
| C (7)  | 5725 (1)  | 1970 (1)  | -822 (1)  | 23 (1) |
| C (8)  | 5532 (1)  | 1974 (1)  | -1850 (1) | 25 (1) |
| C (9)  | 4947 (1)  | 900 (1)   | -2702 (1) | 24 (1) |
| C (10) | 5322 (1)  | -32 (1)   | 2354 (1)  | 23 (1) |
| C (11) | 8323 (1)  | 2746 (1)  | 3720 (1)  | 41 (1) |
| C (12) | 8648 (1)  | 3711 (1)  | 2115 (1)  | 39 (1) |
| C (13) | 5897 (2)  | 3052 (1)  | -1973 (1) | 38 (1) |
| C (14) | 4589 (1)  | 643 (1)   | -3876 (1) | 34 (1) |
| C (15) | 6316 (1)  | 4350 (1)  | 4062 (1)  | 31 (1) |
| C (16) | 7406 (1)  | 4994 (1)  | 4174 (1)  | 29 (1) |
| C (17) | 7288 (1)  | 5278 (1)  | 3293 (1)  | 30 (1) |
| C (18) | 6122 (1)  | 4803 (1)  | 2632 (1)  | 33 (1) |
| C (19) | 5524 (1)  | 4231 (1)  | 3104 (1)  | 35 (1) |
| C (20) | 6044 (2)  | 3946 (2)  | 4845 (1)  | 43 (1) |
| C (21) | 8489 (1)  | 5359 (1)  | 5092 (1)  | 39 (1) |
| C (22) | 8207 (1)  | 5978 (1)  | 3099 (1)  | 42 (1) |
| C (23) | 5615 (2)  | 4933 (2)  | 1645 (1)  | 52 (1) |
| C (24) | 4272 (1)  | 3651 (2)  | 2700 (2)  | 53 (1) |
| K (1)  | 40 (1)    | 8924 (1)  | 2241 (1)  | 31 (1) |
| O (3)  | 1678 (1)  | 8546 (1)  | 1671 (1)  | 34 (1) |
| O (4)  | -553 (1)  | 6937 (1)  | 480 (1)   | 31 (1) |
| O (5)  | -2136 (1) | 7215 (1)  | 1281 (1)  | 32 (1) |
| O (6)  | -1607 (1) | 9362 (1)  | 2744 (1)  | 32 (1) |
| O (7)  | 706 (1)   | 10861 (1) | 4108 (1)  | 34 (1) |
| O (8)  | 2235 (1)  | 10723 (1) | 3198 (1)  | 36 (1) |
| N (1)  | -963 (2)  | 9698 (2)  | 742 (2)   | 66 (1) |
| N (2)  | 920 (2)   | 8100 (2)  | 3697 (1)  | 60 (1) |
| C (25) | 1300 (1)  | 7663 (1)  | 639 (1)   | 39 (1) |
| C (26) | 337 (1)   | 6657 (1)  | 474 (1)   | 38 (1) |
| C (27) | -1504 (1) | 6016 (1)  | 333 (1)   | 36 (1) |
| C (28) | -2436 (1) | 6335 (1)  | 266 (1)   | 36 (1) |
| C (29) | -2969 (1) | 7589 (1)  | 1270 (1)  | 36 (1) |
| C (30) | -2645 (1) | 8414 (1)  | 2387 (1)  | 38 (1) |
| C (31) | -1214 (1) | 10154 (1) | 3826 (1)  | 38 (1) |
| C (32) | -177 (1)  | 11162 (1) | 4107 (1)  | 40 (1) |
| C (33) | 1713 (1)  | 11802 (1) | 4391 (1)  | 42 (1) |
| C (34) | 2577 (1)  | 11424 (2) | 4301 (1)  | 42 (1) |
| C (35) | 3048 (1)  | 10369 (2) | 3037 (1)  | 44 (1) |
| C (36) | 2580 (1)  | 9549 (2)  | 1880 (1)  | 42 (1) |
| C (37) | -1596 (1) | 10018 (2) | 823 (1)   | 39 (1) |
| C (38) | -2399 (1) | 10429 (2) | 937 (1)   | 42 (1) |
| C (39) | 1557 (2)  | 7790 (2)  | 3605 (1)  | 46 (1) |
| C (40) | 2395 (2)  | 7417 (2)  | 3476 (1)  | 62 (1) |
| N (3)  | 1585 (2)  | 4423 (2)  | 2279 (2)  | 93 (1) |
| C (41) | 1439 (2)  | 3528 (3)  | 2001 (2)  | 63 (1) |
| C (42) | 1257 (2)  | 2383 (2)  | 1633 (2)  | 82 (1) |

-----  
U(eq) is defined as 1/3 the trace of the  $U_{ij}$  tensor.

Table 3. Bond lengths (Å) and angles (deg) for **10**

|                  |           |                  |            |
|------------------|-----------|------------------|------------|
| Fe (1) -C (18)   | 2.049 (1) | Fe (1) -C (3)    | 2.052 (1)  |
| Fe (1) -C (17)   | 2.053 (1) | Fe (1) -C (4)    | 2.055 (1)  |
| Fe (1) -C (19)   | 2.063 (2) | Fe (1) -C (16)   | 2.066 (1)  |
| Fe (1) -C (15)   | 2.084 (1) | Fe (1) -C (5)    | 2.103 (1)  |
| Fe (1) -C (2)    | 2.116 (1) | Fe (1) -P (1)    | 2.2928 (4) |
| P (1) -C (2)     | 1.775 (1) | P (1) -C (5)     | 1.779 (1)  |
| P (2) -C (7)     | 1.752 (1) | P (2) -C (10) #2 | 1.752 (1)  |
| O (1) -C (1)     | 1.240 (2) | O (2) -C (6)     | 1.240 (2)  |
| C (1) -C (10)    | 1.457 (2) | C (1) -C (2)     | 1.507 (2)  |
| C (2) -C (3)     | 1.427 (2) | C (3) -C (4)     | 1.433 (2)  |
| C (3) -C (11)    | 1.507 (2) | C (4) -C (5)     | 1.430 (2)  |
| C (4) -C (12)    | 1.510 (2) | C (5) -C (6)     | 1.513 (2)  |
| C (6) -C (7)     | 1.460 (2) | C (7) -C (8)     | 1.435 (2)  |
| C (8) -C (9)     | 1.387 (2) | C (8) -C (13)    | 1.517 (2)  |
| C (9) -C (10) #2 | 1.439 (2) | C (9) -C (14)    | 1.510 (2)  |
| C (10) -C (9) #2 | 1.439 (2) | C (10) -P (2) #2 | 1.752 (1)  |
| C (11) -H (11A)  | 0.9800    | C (11) -H (11B)  | 0.9800     |
| C (11) -H (11C)  | 0.9800    | C (12) -H (12A)  | 0.9800     |
| C (12) -H (12B)  | 0.9800    | C (12) -H (12C)  | 0.9800     |
| C (13) -H (13A)  | 0.9800    | C (13) -H (13B)  | 0.9800     |
| C (13) -H (13C)  | 0.9800    | C (14) -H (14A)  | 0.9800     |
| C (14) -H (14B)  | 0.9800    | C (14) -H (14C)  | 0.9800     |
| C (15) -C (16)   | 1.428 (2) | C (15) -C (19)   | 1.431 (2)  |
| C (15) -C (20)   | 1.500 (2) | C (16) -C (17)   | 1.432 (2)  |
| C (16) -C (21)   | 1.503 (2) | C (17) -C (18)   | 1.428 (2)  |
| C (17) -C (22)   | 1.500 (2) | C (18) -C (19)   | 1.426 (2)  |
| C (18) -C (23)   | 1.501 (2) | C (19) -C (24)   | 1.507 (2)  |
| C (20) -H (20A)  | 0.9800    | C (20) -H (20B)  | 0.9800     |
| C (20) -H (20C)  | 0.9800    | C (21) -H (21A)  | 0.9800     |
| C (21) -H (21B)  | 0.9800    | C (21) -H (21C)  | 0.9800     |
| C (22) -H (22A)  | 0.9800    | C (22) -H (22B)  | 0.9800     |
| C (22) -H (22C)  | 0.9800    | C (23) -H (23A)  | 0.9800     |
| C (23) -H (23B)  | 0.9800    | C (23) -H (23C)  | 0.9800     |
| C (24) -H (24A)  | 0.9800    | C (24) -H (24B)  | 0.9800     |
| C (24) -H (24C)  | 0.9800    | K (1) -O (5)     | 2.780 (1)  |
| K (1) -O (3)     | 2.791 (1) | K (1) -O (4)     | 2.793 (1)  |
| K (1) -O (6)     | 2.793 (1) | K (1) -O (7)     | 2.806 (1)  |
| K (1) -O (8)     | 2.844 (1) | K (1) -N (2)     | 2.880 (2)  |
| K (1) -N (1)     | 2.937 (2) | O (3) -C (25)    | 1.418 (2)  |
| O (3) -C (36)    | 1.423 (2) | O (4) -C (26)    | 1.425 (2)  |
| O (4) -C (27)    | 1.426 (2) | O (5) -C (28)    | 1.426 (2)  |
| O (5) -C (29)    | 1.426 (2) | O (6) -C (31)    | 1.419 (2)  |
| O (6) -C (30)    | 1.426 (2) | O (7) -C (33)    | 1.422 (2)  |
| O (7) -C (32)    | 1.430 (2) | O (8) -C (34)    | 1.420 (2)  |
| O (8) -C (35)    | 1.429 (2) | N (1) -C (37)    | 1.134 (2)  |
| N (2) -C (39)    | 1.133 (2) | C (25) -C (26)   | 1.495 (2)  |
| C (25) -H (25A)  | 0.9900    | C (25) -H (25B)  | 0.9900     |
| C (26) -H (26A)  | 0.9900    | C (26) -H (26B)  | 0.9900     |
| C (27) -C (28)   | 1.500 (2) | C (27) -H (27A)  | 0.9900     |
| C (27) -H (27B)  | 0.9900    | C (28) -H (28A)  | 0.9900     |
| C (28) -H (28B)  | 0.9900    | C (29) -C (30)   | 1.492 (2)  |
| C (29) -H (29A)  | 0.9900    | C (29) -H (29B)  | 0.9900     |
| C (30) -H (30A)  | 0.9900    | C (30) -H (30B)  | 0.9900     |
| C (31) -C (32)   | 1.497 (2) | C (31) -H (31A)  | 0.9900     |
| C (31) -H (31B)  | 0.9900    | C (32) -H (32A)  | 0.9900     |
| C (32) -H (32B)  | 0.9900    | C (33) -C (34)   | 1.492 (2)  |
| C (33) -H (33A)  | 0.9900    | C (33) -H (33B)  | 0.9900     |
| C (34) -H (34A)  | 0.9900    | C (34) -H (34B)  | 0.9900     |
| C (35) -C (36)   | 1.495 (2) | C (35) -H (35A)  | 0.9900     |
| C (35) -H (35B)  | 0.9900    | C (36) -H (36A)  | 0.9900     |
| C (36) -H (36B)  | 0.9900    | C (37) -C (38)   | 1.446 (2)  |



|                          |            |                            |            |
|--------------------------|------------|----------------------------|------------|
| C (38) -H (38A)          | 0.9800     | C (38) -H (38B)            | 0.9800     |
| C (38) -H (38C)          | 0.9800     | C (39) -C (40)             | 1.466 (3)  |
| C (40) -H (40A)          | 0.9800     | C (40) -H (40B)            | 0.9800     |
| C (40) -H (40C)          | 0.9800     | N (3) -C (41)              | 1.120 (3)  |
| C (41) -C (42)           | 1.433 (4)  | C (42) -H (42A)            | 0.9800     |
| C (42) -H (42B)          | 0.9800     | C (42) -H (42C)            | 0.9800     |
|                          |            |                            |            |
| C (18) -Fe (1) -C (3)    | 163.92 (6) | C (18) -Fe (1) -C (17)     | 40.73 (6)  |
| C (3) -Fe (1) -C (17)    | 125.89 (6) | C (18) -Fe (1) -C (4)      | 125.96 (6) |
| C (3) -Fe (1) -C (4)     | 40.83 (5)  | C (17) -Fe (1) -C (4)      | 104.88 (6) |
| C (18) -Fe (1) -C (19)   | 40.58 (6)  | C (3) -Fe (1) -C (19)      | 153.61 (6) |
| C (17) -Fe (1) -C (19)   | 68.24 (6)  | C (4) -Fe (1) -C (19)      | 165.34 (6) |
| C (18) -Fe (1) -C (16)   | 68.29 (6)  | C (3) -Fe (1) -C (16)      | 107.11 (5) |
| C (17) -Fe (1) -C (16)   | 40.69 (5)  | C (4) -Fe (1) -C (16)      | 116.00 (6) |
| C (19) -Fe (1) -C (16)   | 67.86 (6)  | C (18) -Fe (1) -C (15)     | 68.20 (6)  |
| C (3) -Fe (1) -C (15)    | 118.97 (5) | C (17) -Fe (1) -C (15)     | 68.20 (6)  |
| C (4) -Fe (1) -C (15)    | 150.79 (5) | C (19) -Fe (1) -C (15)     | 40.36 (5)  |
| C (16) -Fe (1) -C (15)   | 40.25 (6)  | C (18) -Fe (1) -C (5)      | 105.55 (5) |
| C (3) -Fe (1) -C (5)     | 69.55 (5)  | C (17) -Fe (1) -C (5)      | 113.49 (5) |
| C (4) -Fe (1) -C (5)     | 40.22 (5)  | C (19) -Fe (1) -C (5)      | 129.16 (5) |
| C (16) -Fe (1) -C (5)    | 147.35 (6) | C (15) -Fe (1) -C (5)      | 168.99 (5) |
| C (18) -Fe (1) -C (2)    | 154.91 (6) | C (3) -Fe (1) -C (2)       | 40.02 (5)  |
| C (17) -Fe (1) -C (2)    | 163.33 (5) | C (4) -Fe (1) -C (2)       | 69.46 (5)  |
| C (19) -Fe (1) -C (2)    | 120.76 (6) | C (16) -Fe (1) -C (2)      | 126.44 (5) |
| C (15) -Fe (1) -C (2)    | 108.66 (5) | C (5) -Fe (1) -C (2)       | 72.91 (5)  |
| C (18) -Fe (1) -P (1)    | 112.75 (4) | C (3) -Fe (1) -P (1)       | 75.84 (4)  |
| C (17) -Fe (1) -P (1)    | 148.34 (4) | C (4) -Fe (1) -P (1)       | 76.04 (4)  |
| C (19) -Fe (1) -P (1)    | 102.82 (4) | C (16) -Fe (1) -P (1)      | 165.14 (4) |
| C (15) -Fe (1) -P (1)    | 125.31 (4) | C (5) -Fe (1) -P (1)       | 47.51 (4)  |
| C (2) -Fe (1) -P (1)     | 47.26 (3)  | C (2) -P (1) -C (5)        | 89.73 (6)  |
| C (2) -P (1) -Fe (1)     | 61.13 (4)  | C (5) -P (1) -Fe (1)       | 60.66 (4)  |
| C (7) -P (2) -C (10) #2  | 91.07 (6)  | O (1) -C (1) -C (10)       | 123.7 (1)  |
| O (1) -C (1) -C (2)      | 120.5 (1)  | C (10) -C (1) -C (2)       | 115.7 (1)  |
| C (3) -C (2) -C (1)      | 120.8 (1)  | C (3) -C (2) -P (1)        | 113.0 (1)  |
| C (1) -C (2) -P (1)      | 125.4 (1)  | C (3) -C (2) -Fe (1)       | 67.59 (7)  |
| C (1) -C (2) -Fe (1)     | 137.3 (1)  | P (1) -C (2) -Fe (1)       | 71.61 (5)  |
| C (2) -C (3) -C (4)      | 112.4 (1)  | C (2) -C (3) -C (11)       | 123.5 (1)  |
| C (4) -C (3) -C (11)     | 123.9 (1)  | C (2) -C (3) -Fe (1)       | 72.39 (8)  |
| C (4) -C (3) -Fe (1)     | 69.69 (7)  | C (11) -C (3) -Fe (1)      | 129.9 (1)  |
| C (5) -C (4) -C (3)      | 111.8 (1)  | C (5) -C (4) -C (12)       | 125.0 (1)  |
| C (3) -C (4) -C (12)     | 123.0 (1)  | C (5) -C (4) -Fe (1)       | 71.72 (8)  |
| C (3) -C (4) -Fe (1)     | 69.48 (8)  | C (12) -C (4) -Fe (1)      | 130.9 (1)  |
| C (4) -C (5) -C (6)      | 122.4 (1)  | C (4) -C (5) -P (1)        | 113.1 (1)  |
| C (6) -C (5) -P (1)      | 124.2 (1)  | C (4) -C (5) -Fe (1)       | 68.07 (7)  |
| C (6) -C (5) -Fe (1)     | 134.1 (1)  | P (1) -C (5) -Fe (1)       | 71.84 (5)  |
| O (2) -C (6) -C (7)      | 123.6 (1)  | O (2) -C (6) -C (5)        | 120.3 (1)  |
| C (7) -C (6) -C (5)      | 115.9 (1)  | C (8) -C (7) -C (6)        | 126.8 (1)  |
| C (8) -C (7) -P (2)      | 111.7 (1)  | C (6) -C (7) -P (2)        | 121.2 (1)  |
| C (9) -C (8) -C (7)      | 112.8 (1)  | C (9) -C (8) -C (13)       | 124.5 (1)  |
| C (7) -C (8) -C (13)     | 122.6 (1)  | C (8) -C (9) -C (10) #2    | 112.7 (1)  |
| C (8) -C (9) -C (14)     | 124.7 (1)  | C (10) #2 -C (9) -C (14)   | 122.5 (1)  |
| C (9) #2 -C (10) -C (1)  | 126.7 (1)  | C (9) #2 -C (10) -P (2) #2 | 111.6 (1)  |
| C (1) -C (10) -P (2) #2  | 121.7 (1)  | C (3) -C (11) -H (11A)     | 109.5      |
| C (3) -C (11) -H (11B)   | 109.5      | H (11A) -C (11) -H (11B)   | 109.5      |
| C (3) -C (11) -H (11C)   | 109.5      | H (11A) -C (11) -H (11C)   | 109.5      |
| H (11B) -C (11) -H (11C) | 109.5      | C (4) -C (12) -H (12A)     | 109.5      |
| C (4) -C (12) -H (12B)   | 109.5      | H (12A) -C (12) -H (12B)   | 109.5      |
| C (4) -C (12) -H (12C)   | 109.5      | H (12A) -C (12) -H (12C)   | 109.5      |
| H (12B) -C (12) -H (12C) | 109.5      | C (8) -C (13) -H (13A)     | 109.5      |
| C (8) -C (13) -H (13B)   | 109.5      | H (13A) -C (13) -H (13B)   | 109.5      |
| C (8) -C (13) -H (13C)   | 109.5      | H (13A) -C (13) -H (13C)   | 109.5      |
| H (13B) -C (13) -H (13C) | 109.5      | C (9) -C (14) -H (14A)     | 109.5      |

|                          |            |                          |            |
|--------------------------|------------|--------------------------|------------|
| C (9) -C (14) -H (14B)   | 109.5      | H (14A) -C (14) -H (14B) | 109.5      |
| C (9) -C (14) -H (14C)   | 109.5      | H (14A) -C (14) -H (14C) | 109.5      |
| H (14B) -C (14) -H (14C) | 109.5      | C (16) -C (15) -C (19)   | 107.5 (1)  |
| C (16) -C (15) -C (20)   | 126.5 (1)  | C (19) -C (15) -C (20)   | 125.9 (1)  |
| C (16) -C (15) -Fe (1)   | 69.22 (8)  | C (19) -C (15) -Fe (1)   | 69.05 (8)  |
| C (20) -C (15) -Fe (1)   | 130.5 (1)  | C (15) -C (16) -C (17)   | 108.3 (1)  |
| C (15) -C (16) -C (21)   | 125.6 (1)  | C (17) -C (16) -C (21)   | 126.0 (1)  |
| C (15) -C (16) -Fe (1)   | 70.53 (8)  | C (17) -C (16) -Fe (1)   | 69.14 (8)  |
| C (21) -C (16) -Fe (1)   | 128.3 (1)  | C (18) -C (17) -C (16)   | 107.8 (1)  |
| C (18) -C (17) -C (22)   | 125.1 (1)  | C (16) -C (17) -C (22)   | 127.1 (1)  |
| C (18) -C (17) -Fe (1)   | 69.50 (8)  | C (16) -C (17) -Fe (1)   | 70.16 (8)  |
| C (22) -C (17) -Fe (1)   | 127.2 (1)  | C (19) -C (18) -C (17)   | 108.0 (1)  |
| C (19) -C (18) -C (23)   | 126.1 (1)  | C (17) -C (18) -C (23)   | 125.9 (2)  |
| C (19) -C (18) -Fe (1)   | 70.24 (8)  | C (17) -C (18) -Fe (1)   | 69.77 (8)  |
| C (23) -C (18) -Fe (1)   | 127.9 (1)  | C (18) -C (19) -C (15)   | 108.4 (1)  |
| C (18) -C (19) -C (24)   | 126.0 (1)  | C (15) -C (19) -C (24)   | 125.5 (2)  |
| C (18) -C (19) -Fe (1)   | 69.18 (8)  | C (15) -C (19) -Fe (1)   | 70.59 (8)  |
| C (24) -C (19) -Fe (1)   | 128.4 (1)  | C (15) -C (20) -H (20A)  | 109.5      |
| C (15) -C (20) -H (20B)  | 109.5      | H (20A) -C (20) -H (20B) | 109.5      |
| C (15) -C (20) -H (20C)  | 109.5      | H (20A) -C (20) -H (20C) | 109.5      |
| H (20B) -C (20) -H (20C) | 109.5      | C (16) -C (21) -H (21A)  | 109.5      |
| C (16) -C (21) -H (21B)  | 109.5      | H (21A) -C (21) -H (21B) | 109.5      |
| C (16) -C (21) -H (21C)  | 109.5      | H (21A) -C (21) -H (21C) | 109.5      |
| H (21B) -C (21) -H (21C) | 109.5      | C (17) -C (22) -H (22A)  | 109.5      |
| C (17) -C (22) -H (22B)  | 109.5      | H (22A) -C (22) -H (22B) | 109.5      |
| C (17) -C (22) -H (22C)  | 109.5      | H (22A) -C (22) -H (22C) | 109.5      |
| H (22B) -C (22) -H (22C) | 109.5      | C (18) -C (23) -H (23A)  | 109.5      |
| C (18) -C (23) -H (23B)  | 109.5      | H (23A) -C (23) -H (23B) | 109.5      |
| C (18) -C (23) -H (23C)  | 109.5      | H (23A) -C (23) -H (23C) | 109.5      |
| H (23B) -C (23) -H (23C) | 109.5      | C (19) -C (24) -H (24A)  | 109.5      |
| C (19) -C (24) -H (24B)  | 109.5      | H (24A) -C (24) -H (24B) | 109.5      |
| C (19) -C (24) -H (24C)  | 109.5      | H (24A) -C (24) -H (24C) | 109.5      |
| H (24B) -C (24) -H (24C) | 109.5      | O (5) -K (1) -O (3)      | 120.65 (3) |
| O (5) -K (1) -O (4)      | 61.49 (3)  | O (3) -K (1) -O (4)      | 59.82 (3)  |
| O (5) -K (1) -O (6)      | 60.04 (3)  | O (3) -K (1) -O (6)      | 176.96 (3) |
| O (4) -K (1) -O (6)      | 120.28 (3) | O (5) -K (1) -O (7)      | 119.10 (3) |
| O (3) -K (1) -O (7)      | 118.77 (3) | O (4) -K (1) -O (7)      | 175.82 (3) |
| O (6) -K (1) -O (7)      | 61.37 (3)  | O (5) -K (1) -O (8)      | 177.89 (3) |
| O (3) -K (1) -O (8)      | 60.54 (3)  | O (4) -K (1) -O (8)      | 119.36 (3) |
| O (6) -K (1) -O (8)      | 118.67 (3) | O (7) -K (1) -O (8)      | 60.21 (3)  |
| O (5) -K (1) -N (2)      | 95.19 (4)  | O (3) -K (1) -N (2)      | 77.23 (4)  |
| O (4) -K (1) -N (2)      | 90.33 (4)  | O (6) -K (1) -N (2)      | 105.75 (4) |
| O (7) -K (1) -N (2)      | 85.50 (4)  | O (8) -K (1) -N (2)      | 86.77 (4)  |
| O (5) -K (1) -N (1)      | 82.26 (4)  | O (3) -K (1) -N (1)      | 104.75 (4) |
| O (4) -K (1) -N (1)      | 89.16 (5)  | O (6) -K (1) -N (1)      | 72.29 (4)  |
| O (7) -K (1) -N (1)      | 95.02 (5)  | O (8) -K (1) -N (1)      | 95.77 (4)  |
| N (2) -K (1) -N (1)      | 177.32 (5) | C (25) -O (3) -C (36)    | 112.1 (1)  |
| C (25) -O (3) -K (1)     | 116.69 (8) | C (36) -O (3) -K (1)     | 113.3 (1)  |
| C (26) -O (4) -C (27)    | 111.7 (1)  | C (26) -O (4) -K (1)     | 115.00 (8) |
| C (27) -O (4) -K (1)     | 111.74 (8) | C (28) -O (5) -C (29)    | 112.6 (1)  |
| C (28) -O (5) -K (1)     | 114.85 (8) | C (29) -O (5) -K (1)     | 114.90 (8) |
| C (31) -O (6) -C (30)    | 112.4 (1)  | C (31) -O (6) -K (1)     | 114.14 (8) |
| C (30) -O (6) -K (1)     | 117.0 (1)  | C (33) -O (7) -C (32)    | 111.8 (1)  |
| C (33) -O (7) -K (1)     | 115.5 (1)  | C (32) -O (7) -K (1)     | 112.58 (8) |
| C (34) -O (8) -C (35)    | 112.0 (1)  | C (34) -O (8) -K (1)     | 112.3 (1)  |
| C (35) -O (8) -K (1)     | 113.7 (1)  | C (37) -N (1) -K (1)     | 122.2 (1)  |
| C (39) -N (2) -K (1)     | 119.3 (1)  | O (3) -C (25) -C (26)    | 108.7 (1)  |
| O (3) -C (25) -H (25A)   | 110.0      | C (26) -C (25) -H (25A)  | 110.0      |
| O (3) -C (25) -H (25B)   | 110.0      | C (26) -C (25) -H (25B)  | 110.0      |
| H (25A) -C (25) -H (25B) | 108.3      | O (4) -C (26) -C (25)    | 108.3 (1)  |
| O (4) -C (26) -H (26A)   | 110.0      | C (25) -C (26) -H (26A)  | 110.0      |
| O (4) -C (26) -H (26B)   | 110.0      | C (25) -C (26) -H (26B)  | 110.0      |
| H (26A) -C (26) -H (26B) | 108.4      | O (4) -C (27) -C (28)    | 109.1 (1)  |

|                          |           |                          |           |
|--------------------------|-----------|--------------------------|-----------|
| O (4) -C (27) -H (27A)   | 109.9     | C (28) -C (27) -H (27A)  | 109.9     |
| O (4) -C (27) -H (27B)   | 109.9     | C (28) -C (27) -H (27B)  | 109.9     |
| H (27A) -C (27) -H (27B) | 108.3     | O (5) -C (28) -C (27)    | 109.3 (1) |
| O (5) -C (28) -H (28A)   | 109.8     | C (27) -C (28) -H (28A)  | 109.8     |
| O (5) -C (28) -H (28B)   | 109.8     | C (27) -C (28) -H (28B)  | 109.8     |
| H (28A) -C (28) -H (28B) | 108.3     | O (5) -C (29) -C (30)    | 108.8 (1) |
| O (5) -C (29) -H (29A)   | 109.9     | C (30) -C (29) -H (29A)  | 109.9     |
| O (5) -C (29) -H (29B)   | 109.9     | C (30) -C (29) -H (29B)  | 109.9     |
| H (29A) -C (29) -H (29B) | 108.3     | O (6) -C (30) -C (29)    | 109.3 (1) |
| O (6) -C (30) -H (30A)   | 109.8     | C (29) -C (30) -H (30A)  | 109.8     |
| O (6) -C (30) -H (30B)   | 109.8     | C (29) -C (30) -H (30B)  | 109.8     |
| H (30A) -C (30) -H (30B) | 108.3     | O (6) -C (31) -C (32)    | 109.0 (1) |
| O (6) -C (31) -H (31A)   | 109.9     | C (32) -C (31) -H (31A)  | 109.9     |
| O (6) -C (31) -H (31B)   | 109.9     | C (32) -C (31) -H (31B)  | 109.9     |
| H (31A) -C (31) -H (31B) | 108.3     | O (7) -C (32) -C (31)    | 110.1 (1) |
| O (7) -C (32) -H (32A)   | 109.6     | C (31) -C (32) -H (32A)  | 109.6     |
| O (7) -C (32) -H (32B)   | 109.6     | C (31) -C (32) -H (32B)  | 109.6     |
| H (32A) -C (32) -H (32B) | 108.2     | O (7) -C (33) -C (34)    | 109.4 (1) |
| O (7) -C (33) -H (33A)   | 109.8     | C (34) -C (33) -H (33A)  | 109.8     |
| O (7) -C (33) -H (33B)   | 109.8     | C (34) -C (33) -H (33B)  | 109.8     |
| H (33A) -C (33) -H (33B) | 108.2     | O (8) -C (34) -C (33)    | 108.5 (1) |
| O (8) -C (34) -H (34A)   | 110.0     | C (33) -C (34) -H (34A)  | 110.0     |
| O (8) -C (34) -H (34B)   | 110.0     | C (33) -C (34) -H (34B)  | 110.0     |
| H (34A) -C (34) -H (34B) | 108.4     | O (8) -C (35) -C (36)    | 108.6 (1) |
| O (8) -C (35) -H (35A)   | 110.0     | C (36) -C (35) -H (35A)  | 110.0     |
| O (8) -C (35) -H (35B)   | 110.0     | C (36) -C (35) -H (35B)  | 110.0     |
| H (35A) -C (35) -H (35B) | 108.3     | O (3) -C (36) -C (35)    | 108.8 (1) |
| O (3) -C (36) -H (36A)   | 109.9     | C (35) -C (36) -H (36A)  | 109.9     |
| O (3) -C (36) -H (36B)   | 109.9     | C (35) -C (36) -H (36B)  | 109.9     |
| H (36A) -C (36) -H (36B) | 108.3     | N (1) -C (37) -C (38)    | 179.5 (2) |
| C (37) -C (38) -H (38A)  | 109.5     | C (37) -C (38) -H (38B)  | 109.5     |
| H (38A) -C (38) -H (38B) | 109.5     | C (37) -C (38) -H (38C)  | 109.5     |
| H (38A) -C (38) -H (38C) | 109.5     | H (38B) -C (38) -H (38C) | 109.5     |
| N (2) -C (39) -C (40)    | 178.2 (2) | C (39) -C (40) -H (40A)  | 109.5     |
| C (39) -C (40) -H (40B)  | 109.5     | H (40A) -C (40) -H (40B) | 109.5     |
| C (39) -C (40) -H (40C)  | 109.5     | H (40A) -C (40) -H (40C) | 109.5     |
| H (40B) -C (40) -H (40C) | 109.5     | N (3) -C (41) -C (42)    | 179.2 (3) |
| C (41) -C (42) -H (42A)  | 109.5     | C (41) -C (42) -H (42B)  | 109.5     |
| H (42A) -C (42) -H (42B) | 109.5     | C (41) -C (42) -H (42C)  | 109.5     |
| H (42A) -C (42) -H (42C) | 109.5     | H (42B) -C (42) -H (42C) | 109.5     |

-----  
Estimated standard deviations are given in the parenthesis.

Symmetry operators ::

1: x, y, z

2: -x, -y, -z

Table 4. Anisotropic displacement parameters ( $\text{Å}^2 \times 10^3$ ) for **10**

| atom   | U11    | U22     | U33    | U23    | U13    | U12    |
|--------|--------|---------|--------|--------|--------|--------|
| Fe (1) | 21 (1) | 20 (1)  | 18 (1) | 3 (1)  | 5 (1)  | 9 (1)  |
| P (1)  | 22 (1) | 22 (1)  | 18 (1) | 4 (1)  | 6 (1)  | 6 (1)  |
| P (2)  | 27 (1) | 20 (1)  | 18 (1) | 5 (1)  | 9 (1)  | 7 (1)  |
| O (1)  | 74 (1) | 30 (1)  | 19 (1) | 6 (1)  | 13 (1) | 14 (1) |
| O (2)  | 58 (1) | 22 (1)  | 32 (1) | 8 (1)  | 19 (1) | 4 (1)  |
| C (1)  | 30 (1) | 25 (1)  | 20 (1) | 6 (1)  | 7 (1)  | 11 (1) |
| C (2)  | 26 (1) | 20 (1)  | 19 (1) | 3 (1)  | 7 (1)  | 9 (1)  |
| C (3)  | 24 (1) | 21 (1)  | 25 (1) | 3 (1)  | 6 (1)  | 11 (1) |
| C (4)  | 24 (1) | 20 (1)  | 29 (1) | 4 (1)  | 12 (1) | 9 (1)  |
| C (5)  | 28 (1) | 19 (1)  | 21 (1) | 4 (1)  | 11 (1) | 8 (1)  |
| C (6)  | 31 (1) | 21 (1)  | 26 (1) | 6 (1)  | 14 (1) | 9 (1)  |
| C (7)  | 23 (1) | 21 (1)  | 23 (1) | 7 (1)  | 10 (1) | 9 (1)  |
| C (8)  | 25 (1) | 25 (1)  | 26 (1) | 11 (1) | 13 (1) | 13 (1) |
| C (9)  | 24 (1) | 28 (1)  | 22 (1) | 10 (1) | 10 (1) | 13 (1) |
| C (10) | 21 (1) | 23 (1)  | 20 (1) | 7 (1)  | 8 (1)  | 9 (1)  |
| C (11) | 32 (1) | 37 (1)  | 42 (1) | 11 (1) | 3 (1)  | 19 (1) |
| C (12) | 28 (1) | 33 (1)  | 46 (1) | 9 (1)  | 18 (1) | 9 (1)  |
| C (13) | 57 (1) | 28 (1)  | 32 (1) | 16 (1) | 21 (1) | 19 (1) |
| C (14) | 43 (1) | 36 (1)  | 24 (1) | 14 (1) | 13 (1) | 18 (1) |
| C (15) | 35 (1) | 29 (1)  | 26 (1) | 6 (1)  | 15 (1) | 18 (1) |
| C (16) | 34 (1) | 22 (1)  | 19 (1) | 1 (1)  | 6 (1)  | 12 (1) |
| C (17) | 37 (1) | 20 (1)  | 26 (1) | 4 (1)  | 11 (1) | 13 (1) |
| C (18) | 42 (1) | 31 (1)  | 27 (1) | 8 (1)  | 11 (1) | 25 (1) |
| C (19) | 34 (1) | 36 (1)  | 32 (1) | 7 (1)  | 13 (1) | 22 (1) |
| C (20) | 53 (1) | 44 (1)  | 35 (1) | 14 (1) | 26 (1) | 23 (1) |
| C (21) | 36 (1) | 32 (1)  | 26 (1) | 2 (1)  | 1 (1)  | 10 (1) |
| C (22) | 54 (1) | 23 (1)  | 38 (1) | 9 (1)  | 20 (1) | 11 (1) |
| C (23) | 66 (1) | 60 (1)  | 40 (1) | 24 (1) | 15 (1) | 45 (1) |
| C (24) | 36 (1) | 68 (1)  | 50 (1) | 12 (1) | 17 (1) | 30 (1) |
| K (1)  | 24 (1) | 30 (1)  | 33 (1) | 8 (1)  | 11 (1) | 13 (1) |
| O (3)  | 27 (1) | 37 (1)  | 31 (1) | 9 (1)  | 15 (1) | 12 (1) |
| O (4)  | 29 (1) | 27 (1)  | 34 (1) | 11 (1) | 14 (1) | 12 (1) |
| O (5)  | 27 (1) | 32 (1)  | 33 (1) | 12 (1) | 11 (1) | 13 (1) |
| O (6)  | 28 (1) | 36 (1)  | 32 (1) | 13 (1) | 16 (1) | 16 (1) |
| O (7)  | 33 (1) | 34 (1)  | 36 (1) | 12 (1) | 14 (1) | 19 (1) |
| O (8)  | 28 (1) | 39 (1)  | 35 (1) | 9 (1)  | 12 (1) | 16 (1) |
| N (1)  | 74 (1) | 95 (2)  | 89 (1) | 69 (1) | 56 (1) | 60 (1) |
| N (2)  | 72 (1) | 79 (1)  | 57 (1) | 41 (1) | 38 (1) | 47 (1) |
| C (25) | 35 (1) | 45 (1)  | 32 (1) | 9 (1)  | 19 (1) | 19 (1) |
| C (26) | 39 (1) | 35 (1)  | 36 (1) | 8 (1)  | 16 (1) | 21 (1) |
| C (27) | 37 (1) | 25 (1)  | 37 (1) | 10 (1) | 15 (1) | 8 (1)  |
| C (28) | 32 (1) | 30 (1)  | 34 (1) | 11 (1) | 10 (1) | 7 (1)  |
| C (29) | 24 (1) | 35 (1)  | 47 (1) | 20 (1) | 13 (1) | 12 (1) |
| C (30) | 30 (1) | 43 (1)  | 49 (1) | 23 (1) | 23 (1) | 18 (1) |
| C (31) | 41 (1) | 46 (1)  | 35 (1) | 14 (1) | 21 (1) | 26 (1) |
| C (32) | 41 (1) | 40 (1)  | 39 (1) | 10 (1) | 18 (1) | 27 (1) |
| C (33) | 38 (1) | 32 (1)  | 40 (1) | 5 (1)  | 14 (1) | 14 (1) |
| C (34) | 32 (1) | 41 (1)  | 35 (1) | 4 (1)  | 8 (1)  | 13 (1) |
| C (35) | 23 (1) | 42 (1)  | 52 (1) | 8 (1)  | 15 (1) | 12 (1) |
| C (36) | 29 (1) | 44 (1)  | 48 (1) | 13 (1) | 23 (1) | 14 (1) |
| C (37) | 40 (1) | 43 (1)  | 43 (1) | 26 (1) | 21 (1) | 19 (1) |
| C (38) | 36 (1) | 41 (1)  | 44 (1) | 16 (1) | 14 (1) | 19 (1) |
| C (39) | 59 (1) | 52 (1)  | 31 (1) | 20 (1) | 18 (1) | 31 (1) |
| C (40) | 72 (1) | 80 (2)  | 33 (1) | 17 (1) | 12 (1) | 52 (1) |
| N (3)  | 92 (2) | 103 (2) | 49 (1) | 8 (1)  | 20 (1) | 39 (2) |
| C (41) | 45 (1) | 88 (2)  | 39 (1) | 24 (1) | 14 (1) | 18 (1) |
| C (42) | 56 (1) | 97 (2)  | 70 (2) | 48 (2) | 13 (1) | 10 (1) |

The anisotropic displacement factor exponent takes the form  
 $2 \pi^2 [h^2 a^{*2} U(11) + \dots + 2 h k a^* b^* U(12)]$

Table 5. Hydrogen Coordinates ( $\text{Å} \times 10^4$ ) and equivalent isotropic displacement parameters ( $\text{Å}^2 \times 10^3$ ) for **10**

| atom   | x          | y     | z         | U (eq) |
|--------|------------|-------|-----------|--------|
| H(11A) | 8085       | 2702  | 4289      | 61     |
| H(11B) | 8959       | 3484  | 4003      | 61     |
| H(11C) | 8544       | 2153  | 3476      | 61     |
| H(12A) | 8953       | 3198  | 1859      | 59     |
| H(12B) | 9153       | 4263  | 2865      | 59     |
| H(12C) | 8573       | 4103  | 1666      | 59     |
| H(13A) | 6707       | 3400  | -1743     | 57     |
| H(13B) | 5701       | 3573  | -1526     | 57     |
| H(13C) | 5517       | 2879  | -2730     | 57     |
| H(14A) | 4830       | 1349  | -3938     | 52     |
| H(14B) | 3773       | 212   | -4260     | 52     |
| H(14C) | 4930       | 201   | -4191     | 52     |
| H(20A) | 6717       | 4000  | 5350      | 64     |
| H(20B) | 5466       | 3160  | 4451      | 64     |
| H(20C) | 5770       | 4412  | 5245      | 64     |
| H(21A) | 9078       | 5438  | 4839      | 59     |
| H(21B) | 8402       | 4793  | 5364      | 59     |
| H(21C) | 8691       | 6082  | 5671      | 59     |
| H(22A) | 8288       | 6746  | 3340      | 62     |
| H(22B) | 8025       | 5650  | 2328      | 62     |
| H(22C) | 8910       | 5996  | 3502      | 62     |
| H(23A) | 4910       | 4255  | 1135      | 78     |
| H(23B) | 6132       | 5040  | 1306      | 78     |
| H(23C) | 5470       | 5588  | 1849      | 78     |
| H(24A) | 4013       | 4211  | 2948      | 80     |
| H(24B) | 4066       | 3100  | 2979      | 80     |
| H(24C) | 3923       | 3265  | 1911      | 80     |
| H(25A) | 1912       | 7475  | 589       | 46     |
| H(25B) | 1063       | 7902  | 75        | 46     |
| H(26A) | 91         | 6014  | -223      | 46     |
| H(26B) | 563        | 6439  | 1057      | 46     |
| H(27A) | -1313      | 5829  | 944       | 43     |
| H(27B) | -1741      | 5345  | -338.0000 | 43     |
| H(28A) | -2578.0002 | 6591  | -301      | 43     |
| H(28B) | -3129      | 5673  | 74        | 43     |
| H(29A) | -3702      | 6940  | 1005      | 43     |
| H(29B) | -3034      | 7950  | 782       | 43     |
| H(30A) | -3230.0002 | 8660  | 2399      | 45     |
| H(30B) | -2570.9998 | 8054  | 2876      | 45     |
| H(31A) | -1049      | 9811  | 4315      | 46     |
| H(31B) | -1794      | 10384 | 3912      | 46     |
| H(32A) | -328       | 11461 | 3576      | 47     |
| H(32B) | 51         | 11759 | 4828      | 47     |
| H(33A) | 1981       | 12370 | 5138      | 50     |
| H(33B) | 1575       | 12153 | 3904      | 50     |
| H(34A) | 3307       | 12084 | 4585      | 50     |
| H(34B) | 2658       | 11001 | 4727      | 50     |
| H(35A) | 3230       | 10010 | 3506      | 53     |
| H(35B) | 3743       | 11027 | 3226      | 53     |
| H(36A) | 2312       | 9876  | 1410      | 50     |
| H(36B) | 3167       | 9376  | 1727      | 50     |
| H(38A) | -3070      | 10024 | 252       | 63     |
| H(38B) | -2070      | 11236 | 1134      | 63     |
| H(38C) | -2602      | 10307 | 1500      | 63     |
| H(40A) | 2064       | 6596  | 3186      | 92     |
| H(40B) | 3033       | 7763  | 4177      | 92     |
| H(40C) | 2649       | 7643  | 2976      | 92     |

|         |      |      |      |     |
|---------|------|------|------|-----|
| H (42A) | 1166 | 2084 | 886  | 123 |
| H (42B) | 582  | 1931 | 1672 | 123 |
| H (42C) | 1901 | 2352 | 2089 | 123 |

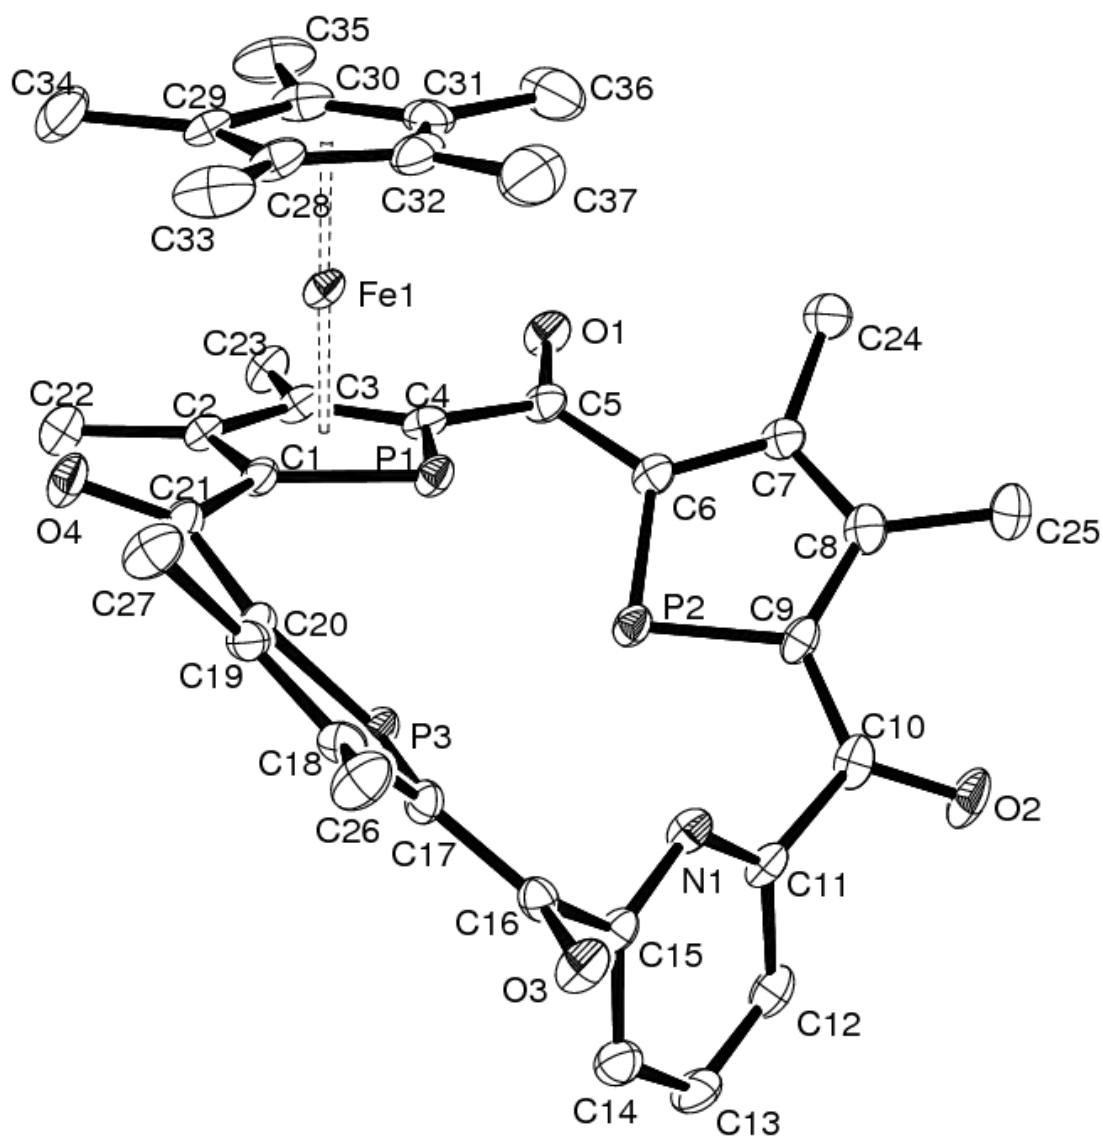



Table 1. Crystal data for **11**

|                                             |                                       |
|---------------------------------------------|---------------------------------------|
| Compound                                    | <b>11</b>                             |
| Molecular formula                           | $C_{61}H_{84}FeK_2NO_{16}P_3,C_2H_3N$ |
| Molecular weight                            | 1355.31                               |
| Crystal habit                               | Red Plate                             |
| Crystal dimensions(mm)                      | 0.22x0.18x0.02                        |
| Crystal system                              | monoclinic                            |
| Space group                                 | $P2_1/c$                              |
| a(Å)                                        | 17.606(1)                             |
| b(Å)                                        | 16.733(1)                             |
| c(Å)                                        | 27.421(1)                             |
| $\alpha(^{\circ})$                          | 90.00                                 |
| $\beta(^{\circ})$                           | 125.457(2)                            |
| $\gamma(^{\circ})$                          | 90.00                                 |
| V(Å <sup>3</sup> )                          | 6580.2(6)                             |
| Z                                           | 4                                     |
| d(g-cm <sup>-3</sup> )                      | 1.368                                 |
| F(000)                                      | 2864                                  |
| $\mu$ (cm <sup>-1</sup> )                   | 0.496                                 |
| Absorption corrections                      | multi-scan ; 0.8987 min, 0.9902 max   |
| Diffractometer                              | KappaCCD                              |
| X-ray source                                | MoK $\alpha$                          |
| $\lambda$ (Å)                               | 0.71069                               |
| Monochromator                               | graphite                              |
| T (K)                                       | 150.0(1)                              |
| Scan mode                                   | phi and omega scans                   |
| Maximum $\theta$                            | 25.02                                 |
| HKL ranges                                  | -20 19 ; -19 19 ; -31 32              |
| Reflections measured                        | 58153                                 |
| Unique data                                 | 11464                                 |
| Rint                                        | 0.0897                                |
| Reflections used                            | 8811                                  |
| Criterion                                   | $I > 2\sigma(I)$                      |
| Refinement type                             | Fsqd                                  |
| Hydrogen atoms                              | constr                                |
| Parameters refined                          | 796                                   |
| Reflections / parameter                     | 11                                    |
| wR2                                         | 0.1646                                |
| R1                                          | 0.0968                                |
| Weights a, b                                | 0.0105 ; 32.349                       |
| GoF                                         | 1.209                                 |
| difference peak / hole (e Å <sup>-3</sup> ) | 0.641(0.081) / -0.595(0.081)          |
| Flack's parameter                           | 0.0(4).                               |

This racemic compound appears in a non-centrosymmetric space group, so pseudoinversion centres are present

Table 2. Atomic Coordinates ( $\text{\AA} \times 10^4$ ) and equivalent isotropic displacement parameters ( $\text{\AA}^2 \times 10^3$ ) for **11**

| atom   | x         | y         | z        | U(eq)  |
|--------|-----------|-----------|----------|--------|
| Fe (1) | 6253 (1)  | 5527 (1)  | 2219 (1) | 29 (1) |
| K (1)  | 10065 (1) | 350 (1)   | 3864 (1) | 37 (1) |
| K (2)  | 6197 (1)  | 1124 (1)  | 1020 (1) | 41 (1) |
| P (1)  | 7346 (1)  | 4555 (1)  | 2514 (1) | 29 (1) |
| P (2)  | 9326 (1)  | 4484 (1)  | 3115 (1) | 31 (1) |
| P (3)  | 7427 (1)  | 2977 (1)  | 2093 (1) | 31 (1) |
| O (1)  | 8512 (3)  | 6696 (2)  | 2947 (2) | 39 (1) |
| O (2)  | 11582 (3) | 3411 (3)  | 4426 (2) | 51 (1) |
| O (3)  | 8377 (3)  | 882 (2)   | 2897 (2) | 40 (1) |
| O (4)  | 4890 (3)  | 3864 (2)  | 1103 (2) | 40 (1) |
| O (5)  | 9365 (3)  | 1111 (3)  | 4453 (2) | 43 (1) |
| O (6)  | 11264 (3) | 1307 (3)  | 4932 (2) | 46 (1) |
| O (7)  | 12000 (3) | 599 (3)   | 4363 (2) | 42 (1) |
| O (8)  | 11121 (3) | -775 (2)  | 3690 (2) | 42 (1) |
| O (9)  | 9277 (3)  | -1111 (2) | 3275 (2) | 43 (1) |
| O (10) | 8618 (3)  | -378 (3)  | 3874 (2) | 42 (1) |
| O (11) | 4837 (4)  | -58 (3)   | 819 (3)  | 88 (2) |
| O (12) | 4297 (3)  | 1385 (3)  | 227 (2)  | 54 (1) |
| O (13) | 5404 (4)  | 2403 (3)  | 117 (4)  | 95 (2) |
| O (14) | 7199 (3)  | 1802 (3)  | 628 (2)  | 54 (1) |
| O (15) | 7949 (3)  | 543 (3)   | 1442 (2) | 56 (1) |
| O (16) | 6680 (3)  | -504 (3)  | 1385 (2) | 60 (1) |
| N (1)  | 9509 (3)  | 2597 (3)  | 3279 (2) | 31 (1) |
| C (1)  | 6335 (4)  | 4553 (3)  | 1765 (2) | 28 (1) |
| C (2)  | 6181 (4)  | 5294 (3)  | 1459 (3) | 29 (1) |
| C (3)  | 6899 (4)  | 5859 (3)  | 1820 (3) | 31 (1) |
| C (4)  | 7588 (4)  | 5549 (3)  | 2405 (3) | 30 (1) |
| C (5)  | 8451 (4)  | 5955 (4)  | 2914 (3) | 32 (1) |
| C (6)  | 9187 (4)  | 5415 (3)  | 3346 (3) | 30 (1) |
| C (7)  | 9841 (4)  | 5541 (3)  | 3974 (3) | 32 (1) |
| C (8)  | 10425 (4) | 4879 (4)  | 4260 (3) | 38 (2) |
| C (9)  | 10246 (4) | 4247 (3)  | 3857 (3) | 31 (1) |
| C (10) | 10781 (4) | 3544 (4)  | 3974 (3) | 34 (1) |
| C (11) | 10379 (4) | 2874 (3)  | 3508 (3) | 32 (1) |
| C (12) | 10936 (4) | 2543 (4)  | 3358 (3) | 39 (2) |
| C (13) | 10606 (4) | 1922 (4)  | 2956 (3) | 41 (2) |
| C (14) | 9729 (4)  | 1616 (4)  | 2734 (3) | 40 (2) |
| C (15) | 9210 (4)  | 1973 (3)  | 2905 (3) | 30 (1) |
| C (16) | 8289 (4)  | 1574 (3)  | 2711 (3) | 29 (1) |
| C (17) | 7431 (4)  | 2012 (3)  | 2343 (2) | 27 (1) |
| C (18) | 6518 (4)  | 1778 (3)  | 2173 (3) | 29 (1) |
| C (19) | 5861 (4)  | 2375 (3)  | 1862 (3) | 29 (1) |
| C (20) | 6235 (4)  | 3074 (3)  | 1786 (2) | 27 (1) |
| C (21) | 5734 (4)  | 3828 (4)  | 1512 (3) | 31 (1) |
| C (22) | 5397 (4)  | 5431 (4)  | 811 (3)  | 42 (2) |
| C (23) | 6959 (4)  | 6668 (3)  | 1596 (3) | 38 (2) |
| C (24) | 9879 (4)  | 6281 (4)  | 4304 (3) | 42 (2) |
| C (25) | 11158 (4) | 4844 (4)  | 4932 (3) | 48 (2) |
| C (26) | 6304 (4)  | 1002 (4)  | 2342 (3) | 45 (2) |
| C (27) | 4874 (4)  | 2305 (4)  | 1675 (3) | 45 (2) |
| C (28) | 5196 (4)  | 5269 (4)  | 2301 (3) | 42 (2) |
| C (29) | 4970 (4)  | 5951 (4)  | 1947 (3) | 37 (2) |
| C (30) | 5675 (5)  | 6538 (4)  | 2301 (3) | 44 (2) |
| C (31) | 6328 (5)  | 6201 (5)  | 2873 (3) | 49 (2) |
| C (32) | 6037 (4)  | 5420 (4)  | 2877 (3) | 45 (2) |
| C (33) | 4629 (5)  | 4516 (4)  | 2121 (4) | 63 (2) |
| C (34) | 4114 (5)  | 6071 (5)  | 1324 (3) | 63 (2) |

|        |           |           |          |         |
|--------|-----------|-----------|----------|---------|
| C (35) | 5697 (6)  | 7383 (4)  | 2116 (5) | 74 (3)  |
| C (36) | 7162 (5)  | 6621 (6)  | 3403 (4) | 88 (3)  |
| C (37) | 6484 (6)  | 4849 (6)  | 3398 (4) | 84 (3)  |
| C (38) | 9971 (5)  | 1587 (4)  | 4971 (3) | 47 (2)  |
| C (39) | 10718 (5) | 1940 (4)  | 4932 (3) | 53 (2)  |
| C (40) | 12098 (4) | 1589 (4)  | 5023 (3) | 49 (2)  |
| C (41) | 12575 (4) | 895 (4)   | 4957 (3) | 46 (2)  |
| C (42) | 12464 (4) | 14 (4)    | 4249 (3) | 53 (2)  |
| C (43) | 11790 (5) | -353 (4)  | 3655 (3) | 49 (2)  |
| C (44) | 10518 (5) | -1263 (4) | 3175 (3) | 47 (2)  |
| C (45) | 9867 (5)  | -1684 (4) | 3266 (3) | 46 (2)  |
| C (46) | 8592 (5)  | -1485 (4) | 3319 (3) | 46 (2)  |
| C (47) | 8029 (4)  | -851 (4)  | 3354 (3) | 46 (2)  |
| C (48) | 8099 (4)  | 199 (4)   | 3947 (3) | 47 (2)  |
| C (49) | 8748 (5)  | 650 (4)   | 4515 (3) | 49 (2)  |
| C (50) | 3984 (6)  | 52 (5)    | 375 (4)  | 77 (3)  |
| C (51) | 3657 (5)  | 895 (5)   | 201 (5)  | 113 (4) |
| C (52) | 3954 (6)  | 2092 (6)  | -16 (6)  | 120 (5) |
| C (53) | 4660 (6)  | 2672 (5)  | 59 (4)   | 80 (3)  |
| C (54) | 6049 (6)  | 2847 (6)  | 224 (6)  | 120 (5) |
| C (55) | 6990 (6)  | 2575 (5)  | 409 (5)  | 84 (3)  |
| C (56) | 8153 (5)  | 1643 (4)  | 982 (4)  | 65 (2)  |
| C (57) | 8342 (5)  | 778 (4)   | 1148 (3) | 55 (2)  |
| C (58) | 8168 (5)  | -254 (5)  | 1611 (4) | 80 (3)  |
| C (59) | 7601 (6)  | -615 (6)  | 1801 (5) | 102 (4) |
| C (60) | 6130 (5)  | -967 (6)  | 1407 (6) | 138 (6) |
| C (61) | 5107 (5)  | -838 (4)  | 960 (4)  | 72 (3)  |
| N (2)  | 7504 (8)  | 2866 (7)  | 4356 (5) | 130 (4) |
| C (62) | 7779 (7)  | 2940 (6)  | 4087 (4) | 77 (3)  |
| C (63) | 8160 (10) | 3043 (8)  | 3760 (5) | 127 (5) |

---

U(eq) is defined as 1/3 the trace of the Uij tensor.

Table 3. Bond lengths (Å) and angles (deg) for **11**

|                 |           |                 |           |
|-----------------|-----------|-----------------|-----------|
| Fe (1) -C (28)  | 2.048 (6) | Fe (1) -C (2)   | 2.049 (6) |
| Fe (1) -C (29)  | 2.052 (5) | Fe (1) -C (30)  | 2.053 (6) |
| Fe (1) -C (31)  | 2.057 (6) | Fe (1) -C (32)  | 2.058 (6) |
| Fe (1) -C (3)   | 2.060 (6) | Fe (1) -C (4)   | 2.097 (5) |
| Fe (1) -C (1)   | 2.106 (6) | Fe (1) -P (1)   | 2.278 (2) |
| K (1) -O (3)    | 2.741 (4) | K (1) -O (9)    | 2.811 (4) |
| K (1) -O (10)   | 2.838 (4) | K (1) -O (5)    | 2.839 (4) |
| K (1) -O (7)    | 2.872 (4) | K (1) -O (8)    | 2.874 (4) |
| K (1) -O (6)    | 2.904 (5) | K (1) -C (15)   | 3.458 (6) |
| K (1) -C (14)   | 3.508 (7) | K (1) -C (16)   | 3.534 (6) |
| K (2) -O (15)   | 2.767 (4) | K (2) -O (12)   | 2.768 (5) |
| K (2) -O (14)   | 2.786 (5) | K (2) -O (16)   | 2.856 (5) |
| K (2) -O (11)   | 2.900 (5) | K (2) -O (13)   | 2.942 (6) |
| K (2) -C (18)   | 3.071 (6) | K (2) -C (17)   | 3.307 (6) |
| K (2) -C (19)   | 3.411 (6) | K (2) -C (54)   | 3.54 (1)  |
| P (1) -C (1)    | 1.775 (6) | P (1) -C (4)    | 1.785 (6) |
| P (2) -C (6)    | 1.752 (6) | P (2) -C (9)    | 1.759 (6) |
| P (3) -C (17)   | 1.752 (6) | P (3) -C (20)   | 1.757 (5) |
| O (1) -C (5)    | 1.244 (7) | O (2) -C (10)   | 1.244 (7) |
| O (3) -C (16)   | 1.237 (7) | O (4) -C (21)   | 1.238 (6) |
| O (5) -C (49)   | 1.420 (8) | O (5) -C (38)   | 1.425 (8) |
| O (6) -C (40)   | 1.421 (8) | O (6) -C (39)   | 1.430 (8) |
| O (7) -C (41)   | 1.418 (8) | O (7) -C (42)   | 1.420 (8) |
| O (8) -C (43)   | 1.425 (7) | O (8) -C (44)   | 1.431 (8) |
| O (9) -C (46)   | 1.425 (7) | O (9) -C (45)   | 1.425 (7) |
| O (10) -C (48)  | 1.422 (7) | O (10) -C (47)  | 1.422 (8) |
| O (11) -C (50)  | 1.28 (1)  | O (11) -C (61)  | 1.37 (1)  |
| O (12) -C (52)  | 1.32 (1)  | O (12) -C (51)  | 1.36 (1)  |
| O (13) -C (54)  | 1.24 (1)  | O (13) -C (53)  | 1.30 (1)  |
| O (14) -C (55)  | 1.38 (1)  | O (14) -C (56)  | 1.394 (8) |
| O (15) -C (57)  | 1.391 (8) | O (15) -C (58)  | 1.39 (1)  |
| O (16) -C (60)  | 1.27 (1)  | O (16) -C (59)  | 1.35 (1)  |
| N (1) -C (15)   | 1.337 (7) | N (1) -C (11)   | 1.356 (7) |
| C (1) -C (2)    | 1.431 (8) | C (1) -C (21)   | 1.490 (8) |
| C (2) -C (3)    | 1.421 (8) | C (2) -C (22)   | 1.507 (8) |
| C (3) -C (4)    | 1.433 (8) | C (3) -C (23)   | 1.515 (8) |
| C (4) -C (5)    | 1.502 (8) | C (5) -C (6)    | 1.456 (8) |
| C (6) -C (7)    | 1.426 (8) | C (7) -C (8)    | 1.401 (8) |
| C (7) -C (24)   | 1.512 (8) | C (8) -C (9)    | 1.43 (1)  |
| C (8) -C (25)   | 1.52 (1)  | C (9) -C (10)   | 1.423 (8) |
| C (10) -C (11)  | 1.530 (8) | C (11) -C (12)  | 1.380 (8) |
| C (12) -C (13)  | 1.37 (1)  | C (12) -H (12)  | 0.9500    |
| C (13) -C (14)  | 1.388 (8) | C (13) -H (13)  | 0.9500    |
| C (14) -C (15)  | 1.383 (8) | C (14) -H (14)  | 0.9500    |
| C (15) -C (16)  | 1.536 (8) | C (16) -C (17)  | 1.438 (8) |
| C (17) -C (18)  | 1.444 (7) | C (18) -C (19)  | 1.385 (8) |
| C (18) -C (26)  | 1.498 (8) | C (19) -C (20)  | 1.416 (8) |
| C (19) -C (27)  | 1.505 (8) | C (20) -C (21)  | 1.472 (8) |
| C (22) -H (22A) | 0.9800    | C (22) -H (22B) | 0.9800    |
| C (22) -H (22C) | 0.9800    | C (23) -H (23A) | 0.9800    |
| C (23) -H (23B) | 0.9800    | C (23) -H (23C) | 0.9800    |
| C (24) -H (24A) | 0.9800    | C (24) -H (24B) | 0.9800    |
| C (24) -H (24C) | 0.9800    | C (25) -H (25A) | 0.9800    |
| C (25) -H (25B) | 0.9800    | C (25) -H (25C) | 0.9800    |
| C (26) -H (26A) | 0.9800    | C (26) -H (26B) | 0.9800    |
| C (26) -H (26C) | 0.9800    | C (27) -H (27A) | 0.9800    |
| C (27) -H (27B) | 0.9800    | C (27) -H (27C) | 0.9800    |
| C (28) -C (29)  | 1.40 (1)  | C (28) -C (32)  | 1.43 (1)  |
| C (28) -C (33)  | 1.50 (1)  | C (29) -C (30)  | 1.43 (1)  |
| C (29) -C (34)  | 1.50 (1)  | C (30) -C (31)  | 1.42 (1)  |
| C (30) -C (35)  | 1.51 (1)  | C (31) -C (32)  | 1.41 (1)  |

|                 |           |                 |           |
|-----------------|-----------|-----------------|-----------|
| C (31) -C (36)  | 1.51 (1)  | C (32) -C (37)  | 1.50 (1)  |
| C (33) -H (33A) | 0.9800    | C (33) -H (33B) | 0.9800    |
| C (33) -H (33C) | 0.9800    | C (34) -H (34A) | 0.9800    |
| C (34) -H (34B) | 0.9800    | C (34) -H (34C) | 0.9800    |
| C (35) -H (35A) | 0.9800    | C (35) -H (35B) | 0.9800    |
| C (35) -H (35C) | 0.9800    | C (36) -H (36A) | 0.9800    |
| C (36) -H (36B) | 0.9800    | C (36) -H (36C) | 0.9800    |
| C (37) -H (37A) | 0.9800    | C (37) -H (37B) | 0.9800    |
| C (37) -H (37C) | 0.9800    | C (38) -C (39)  | 1.50 (1)  |
| C (38) -H (38A) | 0.9900    | C (38) -H (38B) | 0.9900    |
| C (39) -H (39A) | 0.9900    | C (39) -H (39B) | 0.9900    |
| C (40) -C (41)  | 1.50 (1)  | C (40) -H (40A) | 0.9900    |
| C (40) -H (40B) | 0.9900    | C (41) -H (41A) | 0.9900    |
| C (41) -H (41B) | 0.9900    | C (42) -C (43)  | 1.48 (1)  |
| C (42) -H (42A) | 0.9900    | C (42) -H (42B) | 0.9900    |
| C (43) -H (43A) | 0.9900    | C (43) -H (43B) | 0.9900    |
| C (44) -C (45)  | 1.48 (1)  | C (44) -H (44A) | 0.9900    |
| C (44) -H (44B) | 0.9900    | C (45) -H (45A) | 0.9900    |
| C (45) -H (45B) | 0.9900    | C (46) -C (47)  | 1.49 (1)  |
| C (46) -H (46A) | 0.9900    | C (46) -H (46B) | 0.9900    |
| C (47) -H (47A) | 0.9900    | C (47) -H (47B) | 0.9900    |
| C (48) -C (49)  | 1.50 (1)  | C (48) -H (48A) | 0.9900    |
| C (48) -H (48B) | 0.9900    | C (49) -H (49A) | 0.9900    |
| C (49) -H (49B) | 0.9900    | C (50) -C (51)  | 1.494 (1) |
| C (50) -H (50A) | 0.9900    | C (50) -H (50B) | 0.9900    |
| C (51) -H (51A) | 0.9900    | C (51) -H (51B) | 0.9900    |
| C (52) -C (53)  | 1.494 (1) | C (52) -H (52A) | 0.9900    |
| C (52) -H (52B) | 0.9900    | C (53) -H (53A) | 0.9900    |
| C (53) -H (53B) | 0.9900    | C (54) -C (55)  | 1.494 (1) |
| C (54) -H (54A) | 0.9900    | C (54) -H (54B) | 0.9900    |
| C (55) -H (55A) | 0.9900    | C (55) -H (55B) | 0.9900    |
| C (56) -C (57)  | 1.495 (1) | C (56) -H (56A) | 0.9900    |
| C (56) -H (56B) | 0.9900    | C (57) -H (57A) | 0.9900    |
| C (57) -H (57B) | 0.9900    | C (58) -C (59)  | 1.494 (1) |
| C (58) -H (58A) | 0.9900    | C (58) -H (58B) | 0.9900    |
| C (59) -H (59A) | 0.9900    | C (59) -H (59B) | 0.9900    |
| C (60) -C (61)  | 1.494 (1) | C (60) -H (60A) | 0.9900    |
| C (60) -H (60B) | 0.9900    | C (61) -H (61A) | 0.9900    |
| C (61) -H (61B) | 0.9900    | N (2) -C (62)   | 1.10 (1)  |
| C (62) -C (63)  | 1.41 (1)  | C (63) -H (63A) | 0.9800    |
| C (63) -H (63B) | 0.9800    | C (63) -H (63C) | 0.9800    |

|                        |           |                        |           |
|------------------------|-----------|------------------------|-----------|
| C (28) -Fe (1) -C (2)  | 123.2 (3) | C (28) -Fe (1) -C (29) | 39.9 (2)  |
| C (2) -Fe (1) -C (29)  | 106.8 (2) | C (28) -Fe (1) -C (30) | 67.7 (2)  |
| C (2) -Fe (1) -C (30)  | 121.7 (3) | C (29) -Fe (1) -C (30) | 40.8 (3)  |
| C (28) -Fe (1) -C (31) | 67.8 (3)  | C (2) -Fe (1) -C (31)  | 157.7 (3) |
| C (29) -Fe (1) -C (31) | 68.1 (3)  | C (30) -Fe (1) -C (31) | 40.4 (3)  |
| C (28) -Fe (1) -C (32) | 40.7 (3)  | C (2) -Fe (1) -C (32)  | 160.3 (3) |
| C (29) -Fe (1) -C (32) | 67.9 (3)  | C (30) -Fe (1) -C (32) | 67.6 (3)  |
| C (31) -Fe (1) -C (32) | 40.0 (3)  | C (28) -Fe (1) -C (3)  | 158.9 (3) |
| C (2) -Fe (1) -C (3)   | 40.5 (2)  | C (29) -Fe (1) -C (3)  | 123.0 (2) |
| C (30) -Fe (1) -C (3)  | 107.4 (2) | C (31) -Fe (1) -C (3)  | 122.7 (3) |
| C (32) -Fe (1) -C (3)  | 158.4 (3) | C (28) -Fe (1) -C (4)  | 160.0 (3) |
| C (2) -Fe (1) -C (4)   | 69.5 (2)  | C (29) -Fe (1) -C (4)  | 157.7 (2) |
| C (30) -Fe (1) -C (4)  | 121.1 (2) | C (31) -Fe (1) -C (4)  | 106.4 (2) |
| C (32) -Fe (1) -C (4)  | 122.7 (2) | C (3) -Fe (1) -C (4)   | 40.3 (2)  |
| C (28) -Fe (1) -C (1)  | 106.3 (2) | C (2) -Fe (1) -C (1)   | 40.3 (2)  |
| C (29) -Fe (1) -C (1)  | 119.4 (2) | C (30) -Fe (1) -C (1)  | 155.6 (3) |
| C (31) -Fe (1) -C (1)  | 161.4 (3) | C (32) -Fe (1) -C (1)  | 124.2 (3) |
| C (3) -Fe (1) -C (1)   | 69.3 (2)  | C (4) -Fe (1) -C (1)   | 72.9 (2)  |
| C (28) -Fe (1) -P (1)  | 116.4 (2) | C (2) -Fe (1) -P (1)   | 76.6 (2)  |
| C (29) -Fe (1) -P (1)  | 154.2 (2) | C (30) -Fe (1) -P (1)  | 156.8 (2) |

|                        |           |                        |           |
|------------------------|-----------|------------------------|-----------|
| C (31) -Fe (1) -P (1)  | 117.9 (2) | C (32) -Fe (1) -P (1)  | 100.0 (2) |
| C (3) -Fe (1) -P (1)   | 76.6 (2)  | C (4) -Fe (1) -P (1)   | 48.0 (2)  |
| C (1) -Fe (1) -P (1)   | 47.5 (2)  | O (3) -K (1) -O (9)    | 80.3 (1)  |
| O (3) -K (1) -O (10)   | 70.9 (1)  | O (9) -K (1) -O (10)   | 59.1 (1)  |
| O (3) -K (1) -O (5)    | 79.6 (1)  | O (9) -K (1) -O (5)    | 119.0 (1) |
| O (10) -K (1) -O (5)   | 59.9 (1)  | O (3) -K (1) -O (7)    | 137.3 (1) |
| O (9) -K (1) -O (7)    | 117.0 (1) | O (10) -K (1) -O (7)   | 151.8 (1) |
| O (5) -K (1) -O (7)    | 116.8 (1) | O (3) -K (1) -O (8)    | 119.7 (1) |
| O (9) -K (1) -O (8)    | 59.1 (1)  | O (10) -K (1) -O (8)   | 113.0 (1) |
| O (5) -K (1) -O (8)    | 157.6 (1) | O (7) -K (1) -O (8)    | 58.1 (1)  |
| O (3) -K (1) -O (6)    | 122.8 (1) | O (9) -K (1) -O (6)    | 152.4 (1) |
| O (10) -K (1) -O (6)   | 111.0 (1) | O (5) -K (1) -O (6)    | 58.7 (1)  |
| O (7) -K (1) -O (6)    | 58.1 (1)  | O (8) -K (1) -O (6)    | 111.5 (1) |
| O (3) -K (1) -C (15)   | 42.3 (1)  | O (9) -K (1) -C (15)   | 113.2 (1) |
| O (10) -K (1) -C (15)  | 110.3 (1) | O (5) -K (1) -C (15)   | 86.5 (1)  |
| O (7) -K (1) -C (15)   | 97.0 (1)  | O (8) -K (1) -C (15)   | 115.3 (1) |
| O (6) -K (1) -C (15)   | 94.3 (1)  | O (3) -K (1) -C (14)   | 54.3 (1)  |
| O (9) -K (1) -C (14)   | 104.1 (2) | O (10) -K (1) -C (14)  | 125.1 (1) |
| O (5) -K (1) -C (14)   | 109.0 (1) | O (7) -K (1) -C (14)   | 83.1 (1)  |
| O (8) -K (1) -C (14)   | 92.5 (1)  | O (6) -K (1) -C (14)   | 102.1 (2) |
| C (15) -K (1) -C (14)  | 22.9 (1)  | O (3) -K (1) -C (16)   | 17.5 (1)  |
| O (9) -K (1) -C (16)   | 96.0 (1)  | O (10) -K (1) -C (16)  | 85.6 (1)  |
| O (5) -K (1) -C (16)   | 78.3 (1)  | O (7) -K (1) -C (16)   | 122.1 (1) |
| O (8) -K (1) -C (16)   | 123.6 (1) | O (6) -K (1) -C (16)   | 109.3 (1) |
| C (15) -K (1) -C (16)  | 25.4 (1)  | C (14) -K (1) -C (16)  | 41.6 (1)  |
| O (15) -K (2) -O (12)  | 158.3 (2) | O (15) -K (2) -O (14)  | 60.2 (1)  |
| O (12) -K (2) -O (14)  | 112.3 (2) | O (15) -K (2) -O (16)  | 59.0 (1)  |
| O (12) -K (2) -O (16)  | 113.9 (2) | O (14) -K (2) -O (16)  | 113.3 (2) |
| O (15) -K (2) -O (11)  | 115.9 (2) | O (12) -K (2) -O (11)  | 58.0 (2)  |
| O (14) -K (2) -O (11)  | 147.3 (2) | O (16) -K (2) -O (11)  | 57.5 (2)  |
| O (15) -K (2) -O (13)  | 118.5 (2) | O (12) -K (2) -O (13)  | 57.1 (2)  |
| O (14) -K (2) -O (13)  | 58.4 (2)  | O (16) -K (2) -O (13)  | 152.6 (2) |
| O (11) -K (2) -O (13)  | 113.6 (2) | O (15) -K (2) -C (18)  | 101.5 (2) |
| O (12) -K (2) -C (18)  | 99.8 (2)  | O (14) -K (2) -C (18)  | 118.2 (2) |
| O (16) -K (2) -C (18)  | 98.1 (2)  | O (11) -K (2) -C (18)  | 94.5 (2)  |
| O (13) -K (2) -C (18)  | 108.8 (2) | O (15) -K (2) -C (17)  | 80.5 (2)  |
| O (12) -K (2) -C (17)  | 121.1 (2) | O (14) -K (2) -C (17)  | 94.6 (2)  |
| O (16) -K (2) -C (17)  | 99.9 (2)  | O (11) -K (2) -C (17)  | 117.4 (2) |
| O (13) -K (2) -C (17)  | 106.6 (2) | C (18) -K (2) -C (17)  | 25.8 (1)  |
| O (15) -K (2) -C (19)  | 121.4 (2) | O (12) -K (2) -C (19)  | 80.2 (1)  |
| O (14) -K (2) -C (19)  | 114.1 (2) | O (16) -K (2) -C (19)  | 118.8 (2) |
| O (11) -K (2) -C (19)  | 95.7 (2)  | O (13) -K (2) -C (19)  | 86.5 (2)  |
| C (18) -K (2) -C (19)  | 24.0 (1)  | C (17) -K (2) -C (19)  | 40.9 (1)  |
| O (15) -K (2) -C (54)  | 102.1 (2) | O (12) -K (2) -C (54)  | 76.3 (2)  |
| O (14) -K (2) -C (54)  | 42.7 (2)  | O (16) -K (2) -C (54)  | 153.4 (2) |
| O (11) -K (2) -C (54)  | 133.0 (2) | O (13) -K (2) -C (54)  | 19.5 (2)  |
| C (18) -K (2) -C (54)  | 104.4 (3) | C (17) -K (2) -C (54)  | 94.4 (2)  |
| C (19) -K (2) -C (54)  | 86.4 (2)  | C (1) -P (1) -C (4)    | 89.1 (3)  |
| C (1) -P (1) -Fe (1)   | 61.1 (2)  | C (4) -P (1) -Fe (1)   | 60.7 (2)  |
| C (6) -P (2) -C (9)    | 90.6 (3)  | C (17) -P (3) -C (20)  | 90.3 (3)  |
| C (16) -O (3) -K (1)   | 120.6 (4) | C (49) -O (5) -C (38)  | 111.5 (5) |
| C (49) -O (5) -K (1)   | 116.1 (4) | C (38) -O (5) -K (1)   | 119.8 (4) |
| C (40) -O (6) -C (39)  | 112.4 (5) | C (40) -O (6) -K (1)   | 115.6 (4) |
| C (39) -O (6) -K (1)   | 108.2 (4) | C (41) -O (7) -C (42)  | 112.1 (5) |
| C (41) -O (7) -K (1)   | 117.2 (4) | C (42) -O (7) -K (1)   | 118.0 (4) |
| C (43) -O (8) -C (44)  | 112.7 (5) | C (43) -O (8) -K (1)   | 109.1 (4) |
| C (44) -O (8) -K (1)   | 110.9 (3) | C (46) -O (9) -C (45)  | 111.6 (5) |
| C (46) -O (9) -K (1)   | 119.5 (4) | C (45) -O (9) -K (1)   | 118.3 (3) |
| C (48) -O (10) -C (47) | 111.4 (5) | C (48) -O (10) -K (1)  | 111.3 (3) |
| C (47) -O (10) -K (1)  | 111.4 (4) | C (50) -O (11) -C (61) | 115.3 (6) |
| C (50) -O (11) -K (2)  | 117.7 (5) | C (61) -O (11) -K (2)  | 119.0 (4) |
| C (52) -O (12) -C (51) | 113.0 (6) | C (52) -O (12) -K (2)  | 121.9 (5) |
| C (51) -O (12) -K (2)  | 122.1 (4) | C (54) -O (13) -C (53) | 122.5 (7) |

|                          |           |                          |           |
|--------------------------|-----------|--------------------------|-----------|
| C (54) -O (13) -K (2)    | 108.3 (6) | C (53) -O (13) -K (2)    | 107.8 (5) |
| C (55) -O (14) -C (56)   | 113.0 (5) | C (55) -O (14) -K (2)    | 118.7 (4) |
| C (56) -O (14) -K (2)    | 115.5 (4) | C (57) -O (15) -C (58)   | 109.2 (5) |
| C (57) -O (15) -K (2)    | 117.9 (4) | C (58) -O (15) -K (2)    | 120.2 (4) |
| C (60) -O (16) -C (59)   | 116.9 (6) | C (60) -O (16) -K (2)    | 121.2 (5) |
| C (59) -O (16) -K (2)    | 113.3 (5) | C (15) -N (1) -C (11)    | 117.4 (5) |
| C (2) -C (1) -C (21)     | 126.2 (5) | C (2) -C (1) -P (1)      | 113.4 (4) |
| C (21) -C (1) -P (1)     | 120.3 (4) | C (2) -C (1) -Fe (1)     | 67.7 (3)  |
| C (21) -C (1) -Fe (1)    | 129.2 (4) | P (1) -C (1) -Fe (1)     | 71.3 (2)  |
| C (3) -C (2) -C (1)      | 112.3 (5) | C (3) -C (2) -C (22)     | 123.8 (5) |
| C (1) -C (2) -C (22)     | 123.7 (5) | C (3) -C (2) -Fe (1)     | 70.2 (3)  |
| C (1) -C (2) -Fe (1)     | 72.0 (3)  | C (22) -C (2) -Fe (1)    | 130.2 (4) |
| C (2) -C (3) -C (4)      | 111.9 (5) | C (2) -C (3) -C (23)     | 123.7 (5) |
| C (4) -C (3) -C (23)     | 124.3 (5) | C (2) -C (3) -Fe (1)     | 69.3 (3)  |
| C (4) -C (3) -Fe (1)     | 71.2 (3)  | C (23) -C (3) -Fe (1)    | 130.2 (4) |
| C (3) -C (4) -C (5)      | 128.3 (5) | C (3) -C (4) -P (1)      | 113.3 (4) |
| C (5) -C (4) -P (1)      | 118.4 (4) | C (3) -C (4) -Fe (1)     | 68.5 (3)  |
| C (5) -C (4) -Fe (1)     | 128.3 (4) | P (1) -C (4) -Fe (1)     | 71.4 (2)  |
| O (1) -C (5) -C (6)      | 124.1 (5) | O (1) -C (5) -C (4)      | 121.1 (5) |
| C (6) -C (5) -C (4)      | 114.7 (5) | C (7) -C (6) -C (5)      | 127.3 (5) |
| C (7) -C (6) -P (2)      | 112.5 (4) | C (5) -C (6) -P (2)      | 120.2 (4) |
| C (8) -C (7) -C (6)      | 112.1 (5) | C (8) -C (7) -C (24)     | 123.2 (6) |
| C (6) -C (7) -C (24)     | 124.5 (5) | C (7) -C (8) -C (9)      | 113.0 (5) |
| C (7) -C (8) -C (25)     | 122.8 (6) | C (9) -C (8) -C (25)     | 124.2 (6) |
| C (10) -C (9) -C (8)     | 128.2 (5) | C (10) -C (9) -P (2)     | 119.5 (5) |
| C (8) -C (9) -P (2)      | 111.7 (4) | O (2) -C (10) -C (9)     | 126.3 (6) |
| O (2) -C (10) -C (11)    | 114.2 (5) | C (9) -C (10) -C (11)    | 119.5 (5) |
| N (1) -C (11) -C (12)    | 122.1 (6) | N (1) -C (11) -C (10)    | 119.2 (5) |
| C (12) -C (11) -C (10)   | 118.6 (5) | C (13) -C (12) -C (11)   | 120.0 (6) |
| C (13) -C (12) -H (12)   | 120.0     | C (11) -C (12) -H (12)   | 120.0     |
| C (12) -C (13) -C (14)   | 118.5 (6) | C (12) -C (13) -H (13)   | 120.8     |
| C (14) -C (13) -H (13)   | 120.8     | C (15) -C (14) -C (13)   | 118.5 (6) |
| C (15) -C (14) -K (1)    | 76.5 (4)  | C (13) -C (14) -K (1)    | 105.1 (4) |
| C (15) -C (14) -H (14)   | 120.8     | C (13) -C (14) -H (14)   | 120.8     |
| K (1) -C (14) -H (14)    | 88.5      | N (1) -C (15) -C (14)    | 123.6 (5) |
| N (1) -C (15) -C (16)    | 118.2 (5) | C (14) -C (15) -C (16)   | 117.9 (5) |
| N (1) -C (15) -K (1)     | 103.1 (3) | C (14) -C (15) -K (1)    | 80.6 (4)  |
| C (16) -C (15) -K (1)    | 80.1 (3)  | O (3) -C (16) -C (17)    | 126.6 (5) |
| O (3) -C (16) -C (15)    | 114.2 (5) | C (17) -C (16) -C (15)   | 119.3 (5) |
| O (3) -C (16) -K (1)     | 41.9 (3)  | C (17) -C (16) -K (1)    | 161.3 (4) |
| C (15) -C (16) -K (1)    | 74.6 (3)  | C (16) -C (17) -C (18)   | 127.4 (5) |
| C (16) -C (17) -P (3)    | 120.6 (4) | C (18) -C (17) -P (3)    | 111.8 (4) |
| C (16) -C (17) -K (2)    | 107.2 (3) | C (18) -C (17) -K (2)    | 67.9 (3)  |
| P (3) -C (17) -K (2)     | 97.7 (2)  | C (19) -C (18) -C (17)   | 112.3 (5) |
| C (19) -C (18) -C (26)   | 123.0 (5) | C (17) -C (18) -C (26)   | 124.6 (5) |
| C (19) -C (18) -K (2)    | 91.9 (4)  | C (17) -C (18) -K (2)    | 86.3 (3)  |
| C (26) -C (18) -K (2)    | 94.6 (4)  | C (18) -C (19) -C (20)   | 113.1 (5) |
| C (18) -C (19) -C (27)   | 122.7 (5) | C (20) -C (19) -C (27)   | 123.9 (5) |
| C (18) -C (19) -K (2)    | 64.1 (3)  | C (20) -C (19) -K (2)    | 97.4 (3)  |
| C (27) -C (19) -K (2)    | 109.9 (4) | C (19) -C (20) -C (21)   | 126.2 (5) |
| C (19) -C (20) -P (3)    | 112.4 (4) | C (21) -C (20) -P (3)    | 121.3 (4) |
| O (4) -C (21) -C (20)    | 123.6 (5) | O (4) -C (21) -C (1)     | 122.4 (5) |
| C (20) -C (21) -C (1)    | 114.0 (5) | C (2) -C (22) -H (22A)   | 109.5     |
| C (2) -C (22) -H (22B)   | 109.5     | H (22A) -C (22) -H (22B) | 109.5     |
| C (2) -C (22) -H (22C)   | 109.5     | H (22A) -C (22) -H (22C) | 109.5     |
| H (22B) -C (22) -H (22C) | 109.5     | C (3) -C (23) -H (23A)   | 109.5     |
| C (3) -C (23) -H (23B)   | 109.5     | H (23A) -C (23) -H (23B) | 109.5     |
| C (3) -C (23) -H (23C)   | 109.5     | H (23A) -C (23) -H (23C) | 109.5     |
| H (23B) -C (23) -H (23C) | 109.5     | C (7) -C (24) -H (24A)   | 109.5     |
| C (7) -C (24) -H (24B)   | 109.5     | H (24A) -C (24) -H (24B) | 109.5     |
| C (7) -C (24) -H (24C)   | 109.5     | H (24A) -C (24) -H (24C) | 109.5     |
| H (24B) -C (24) -H (24C) | 109.5     | C (8) -C (25) -H (25A)   | 109.5     |
| C (8) -C (25) -H (25B)   | 109.5     | H (25A) -C (25) -H (25B) | 109.5     |

|                          |           |                          |           |
|--------------------------|-----------|--------------------------|-----------|
| C (8) -C (25) -H (25C)   | 109.5     | H (25A) -C (25) -H (25C) | 109.5     |
| H (25B) -C (25) -H (25C) | 109.5     | C (18) -C (26) -H (26A)  | 109.5     |
| C (18) -C (26) -H (26B)  | 109.5     | H (26A) -C (26) -H (26B) | 109.5     |
| C (18) -C (26) -H (26C)  | 109.5     | H (26A) -C (26) -H (26C) | 109.5     |
| H (26B) -C (26) -H (26C) | 109.5     | C (19) -C (27) -H (27A)  | 109.5     |
| C (19) -C (27) -H (27B)  | 109.5     | H (27A) -C (27) -H (27B) | 109.5     |
| C (19) -C (27) -H (27C)  | 109.5     | H (27A) -C (27) -H (27C) | 109.5     |
| H (27B) -C (27) -H (27C) | 109.5     | C (29) -C (28) -C (32)   | 108.6 (6) |
| C (29) -C (28) -C (33)   | 126.1 (7) | C (32) -C (28) -C (33)   | 125.3 (7) |
| C (29) -C (28) -Fe (1)   | 70.2 (3)  | C (32) -C (28) -Fe (1)   | 70.0 (3)  |
| C (33) -C (28) -Fe (1)   | 127.9 (5) | C (28) -C (29) -C (30)   | 107.6 (6) |
| C (28) -C (29) -C (34)   | 126.5 (6) | C (30) -C (29) -C (34)   | 125.8 (6) |
| C (28) -C (29) -Fe (1)   | 69.9 (3)  | C (30) -C (29) -Fe (1)   | 69.6 (3)  |
| C (34) -C (29) -Fe (1)   | 129.0 (5) | C (31) -C (30) -C (29)   | 107.8 (6) |
| C (31) -C (30) -C (35)   | 125.6 (7) | C (29) -C (30) -C (35)   | 126.5 (7) |
| C (31) -C (30) -Fe (1)   | 70.0 (4)  | C (29) -C (30) -Fe (1)   | 69.6 (3)  |
| C (35) -C (30) -Fe (1)   | 128.5 (5) | C (32) -C (31) -C (30)   | 108.2 (6) |
| C (32) -C (31) -C (36)   | 125.4 (8) | C (30) -C (31) -C (36)   | 126.2 (8) |
| C (32) -C (31) -Fe (1)   | 70.0 (4)  | C (30) -C (31) -Fe (1)   | 69.7 (4)  |
| C (36) -C (31) -Fe (1)   | 128.9 (5) | C (31) -C (32) -C (28)   | 107.7 (6) |
| C (31) -C (32) -C (37)   | 127.2 (7) | C (28) -C (32) -C (37)   | 125.0 (7) |
| C (31) -C (32) -Fe (1)   | 70.0 (4)  | C (28) -C (32) -Fe (1)   | 69.3 (4)  |
| C (37) -C (32) -Fe (1)   | 128.8 (5) | C (28) -C (33) -H (33A)  | 109.5     |
| C (28) -C (33) -H (33B)  | 109.5     | H (33A) -C (33) -H (33B) | 109.5     |
| C (28) -C (33) -H (33C)  | 109.5     | H (33A) -C (33) -H (33C) | 109.5     |
| H (33B) -C (33) -H (33C) | 109.5     | C (29) -C (34) -H (34A)  | 109.5     |
| C (29) -C (34) -H (34B)  | 109.5     | H (34A) -C (34) -H (34B) | 109.5     |
| C (29) -C (34) -H (34C)  | 109.5     | H (34A) -C (34) -H (34C) | 109.5     |
| H (34B) -C (34) -H (34C) | 109.5     | C (30) -C (35) -H (35A)  | 109.5     |
| C (30) -C (35) -H (35B)  | 109.5     | H (35A) -C (35) -H (35B) | 109.5     |
| C (30) -C (35) -H (35C)  | 109.5     | H (35A) -C (35) -H (35C) | 109.5     |
| H (35B) -C (35) -H (35C) | 109.5     | C (31) -C (36) -H (36A)  | 109.5     |
| C (31) -C (36) -H (36B)  | 109.5     | H (36A) -C (36) -H (36B) | 109.5     |
| C (31) -C (36) -H (36C)  | 109.5     | H (36A) -C (36) -H (36C) | 109.5     |
| H (36B) -C (36) -H (36C) | 109.5     | C (32) -C (37) -H (37A)  | 109.5     |
| C (32) -C (37) -H (37B)  | 109.5     | H (37A) -C (37) -H (37B) | 109.5     |
| C (32) -C (37) -H (37C)  | 109.5     | H (37A) -C (37) -H (37C) | 109.5     |
| H (37B) -C (37) -H (37C) | 109.5     | O (5) -C (38) -C (39)    | 109.2 (6) |
| O (5) -C (38) -H (38A)   | 109.8     | C (39) -C (38) -H (38A)  | 109.8     |
| O (5) -C (38) -H (38B)   | 109.8     | C (39) -C (38) -H (38B)  | 109.8     |
| H (38A) -C (38) -H (38B) | 108.3     | O (6) -C (39) -C (38)    | 109.0 (5) |
| O (6) -C (39) -H (39A)   | 109.9     | C (38) -C (39) -H (39A)  | 109.9     |
| O (6) -C (39) -H (39B)   | 109.9     | C (38) -C (39) -H (39B)  | 109.9     |
| H (39A) -C (39) -H (39B) | 108.3     | O (6) -C (40) -C (41)    | 108.3 (5) |
| O (6) -C (40) -H (40A)   | 110.0     | C (41) -C (40) -H (40A)  | 110.0     |
| O (6) -C (40) -H (40B)   | 110.0     | C (41) -C (40) -H (40B)  | 110.0     |
| H (40A) -C (40) -H (40B) | 108.4     | O (7) -C (41) -C (40)    | 109.4 (5) |
| O (7) -C (41) -H (41A)   | 109.8     | C (40) -C (41) -H (41A)  | 109.8     |
| O (7) -C (41) -H (41B)   | 109.8     | C (40) -C (41) -H (41B)  | 109.8     |
| H (41A) -C (41) -H (41B) | 108.2     | O (7) -C (42) -C (43)    | 109.4 (5) |
| O (7) -C (42) -H (42A)   | 109.8     | C (43) -C (42) -H (42A)  | 109.8     |
| O (7) -C (42) -H (42B)   | 109.8     | C (43) -C (42) -H (42B)  | 109.8     |
| H (42A) -C (42) -H (42B) | 108.2     | O (8) -C (43) -C (42)    | 107.2 (6) |
| O (8) -C (43) -H (43A)   | 110.3     | C (42) -C (43) -H (43A)  | 110.3     |
| O (8) -C (43) -H (43B)   | 110.3     | C (42) -C (43) -H (43B)  | 110.3     |
| H (43A) -C (43) -H (43B) | 108.5     | O (8) -C (44) -C (45)    | 108.1 (5) |
| O (8) -C (44) -H (44A)   | 110.1     | C (45) -C (44) -H (44A)  | 110.1     |
| O (8) -C (44) -H (44B)   | 110.1     | C (45) -C (44) -H (44B)  | 110.1     |
| H (44A) -C (44) -H (44B) | 108.4     | O (9) -C (45) -C (44)    | 109.0 (5) |
| O (9) -C (45) -H (45A)   | 109.9     | C (44) -C (45) -H (45A)  | 109.9     |
| O (9) -C (45) -H (45B)   | 109.9     | C (44) -C (45) -H (45B)  | 109.9     |
| H (45A) -C (45) -H (45B) | 108.3     | O (9) -C (46) -C (47)    | 108.7 (5) |
| O (9) -C (46) -H (46A)   | 110.0     | C (47) -C (46) -H (46A)  | 110.0     |



|                          |          |                          |           |
|--------------------------|----------|--------------------------|-----------|
| O (9) -C (46) -H (46B)   | 110.0    | C (47) -C (46) -H (46B)  | 110.0     |
| H (46A) -C (46) -H (46B) | 108.3    | O (10) -C (47) -C (46)   | 109.5 (5) |
| O (10) -C (47) -H (47A)  | 109.8    | C (46) -C (47) -H (47A)  | 109.8     |
| O (10) -C (47) -H (47B)  | 109.8    | C (46) -C (47) -H (47B)  | 109.8     |
| H (47A) -C (47) -H (47B) | 108.2    | O (10) -C (48) -C (49)   | 108.9 (5) |
| O (10) -C (48) -H (48A)  | 109.9    | C (49) -C (48) -H (48A)  | 109.9     |
| O (10) -C (48) -H (48B)  | 109.9    | C (49) -C (48) -H (48B)  | 109.9     |
| H (48A) -C (48) -H (48B) | 108.3    | O (5) -C (49) -C (48)    | 108.9 (6) |
| O (5) -C (49) -H (49A)   | 109.9    | C (48) -C (49) -H (49A)  | 109.9     |
| O (5) -C (49) -H (49B)   | 109.9    | C (48) -C (49) -H (49B)  | 109.9     |
| H (49A) -C (49) -H (49B) | 108.3    | O (11) -C (50) -C (51)   | 117.3 (7) |
| O (11) -C (50) -H (50A)  | 108.0    | C (51) -C (50) -H (50A)  | 108.0     |
| O (11) -C (50) -H (50B)  | 108.0    | C (51) -C (50) -H (50B)  | 108.0     |
| H (50A) -C (50) -H (50B) | 107.2    | O (12) -C (51) -C (50)   | 113.5 (7) |
| O (12) -C (51) -H (51A)  | 108.9    | C (50) -C (51) -H (51A)  | 108.9     |
| O (12) -C (51) -H (51B)  | 108.9    | C (50) -C (51) -H (51B)  | 108.9     |
| H (51A) -C (51) -H (51B) | 107.7    | O (12) -C (52) -C (53)   | 114.3 (7) |
| O (12) -C (52) -H (52A)  | 108.7    | C (53) -C (52) -H (52A)  | 108.7     |
| O (12) -C (52) -H (52B)  | 108.7    | C (53) -C (52) -H (52B)  | 108.7     |
| H (52A) -C (52) -H (52B) | 107.6    | O (13) -C (53) -C (52)   | 119.3 (7) |
| O (13) -C (53) -H (53A)  | 107.5    | C (52) -C (53) -H (53A)  | 107.5     |
| O (13) -C (53) -H (53B)  | 107.5    | C (52) -C (53) -H (53B)  | 107.5     |
| H (53A) -C (53) -H (53B) | 107.0    | O (13) -C (54) -C (55)   | 125.4 (8) |
| O (13) -C (54) -K (2)    | 52.2 (5) | C (55) -C (54) -K (2)    | 82.6 (5)  |
| O (13) -C (54) -H (54A)  | 106.0    | C (55) -C (54) -H (54A)  | 106.0     |
| K (2) -C (54) -H (54A)   | 93.9     | O (13) -C (54) -H (54B)  | 106.0     |
| C (55) -C (54) -H (54B)  | 106.0    | K (2) -C (54) -H (54B)   | 154.4     |
| H (54A) -C (54) -H (54B) | 106.3    | O (14) -C (55) -C (54)   | 113.3 (6) |
| O (14) -C (55) -H (55A)  | 108.9    | C (54) -C (55) -H (55A)  | 108.9     |
| O (14) -C (55) -H (55B)  | 108.9    | C (54) -C (55) -H (55B)  | 108.9     |
| H (55A) -C (55) -H (55B) | 107.7    | O (14) -C (56) -C (57)   | 111.2 (6) |
| O (14) -C (56) -H (56A)  | 109.4    | C (57) -C (56) -H (56A)  | 109.4     |
| O (14) -C (56) -H (56B)  | 109.4    | C (57) -C (56) -H (56B)  | 109.4     |
| H (56A) -C (56) -H (56B) | 108.0    | O (15) -C (57) -C (56)   | 110.7 (6) |
| O (15) -C (57) -H (57A)  | 109.5    | C (56) -C (57) -H (57A)  | 109.5     |
| O (15) -C (57) -H (57B)  | 109.5    | C (56) -C (57) -H (57B)  | 109.5     |
| H (57A) -C (57) -H (57B) | 108.1    | O (15) -C (58) -C (59)   | 113.1 (6) |
| O (15) -C (58) -H (58A)  | 109.0    | C (59) -C (58) -H (58A)  | 109.0     |
| O (15) -C (58) -H (58B)  | 109.0    | C (59) -C (58) -H (58B)  | 109.0     |
| H (58A) -C (58) -H (58B) | 107.8    | O (16) -C (59) -C (58)   | 111.6 (7) |
| O (16) -C (59) -H (59A)  | 109.3    | C (58) -C (59) -H (59A)  | 109.3     |
| O (16) -C (59) -H (59B)  | 109.3    | C (58) -C (59) -H (59B)  | 109.3     |
| H (59A) -C (59) -H (59B) | 108.0    | O (16) -C (60) -C (61)   | 117.6 (8) |
| O (16) -C (60) -H (60A)  | 107.9    | C (61) -C (60) -H (60A)  | 107.9     |
| O (16) -C (60) -H (60B)  | 107.9    | C (61) -C (60) -H (60B)  | 107.9     |
| H (60A) -C (60) -H (60B) | 107.2    | O (11) -C (61) -C (60)   | 115.2 (7) |
| O (11) -C (61) -H (61A)  | 108.5    | C (60) -C (61) -H (61A)  | 108.5     |
| O (11) -C (61) -H (61B)  | 108.5    | C (60) -C (61) -H (61B)  | 108.5     |
| H (61A) -C (61) -H (61B) | 107.5    | N (2) -C (62) -C (63)    | 178 (1)   |
| C (62) -C (63) -H (63A)  | 109.5    | C (62) -C (63) -H (63B)  | 109.5     |
| H (63A) -C (63) -H (63B) | 109.5    | C (62) -C (63) -H (63C)  | 109.5     |
| H (63A) -C (63) -H (63C) | 109.5    | H (63B) -C (63) -H (63C) | 109.5     |

Table 4. Anisotropic displacement parameters ( $\text{Å}^2 \times 10^3$ ) for **11**

| atom   | U11    | U22    | U33      | U23     | U13    | U12     |
|--------|--------|--------|----------|---------|--------|---------|
| Fe (1) | 21 (1) | 28 (1) | 37 (1)   | 2 (1)   | 16 (1) | 2 (1)   |
| K (1)  | 29 (1) | 35 (1) | 43 (1)   | -1 (1)  | 19 (1) | 2 (1)   |
| K (2)  | 32 (1) | 40 (1) | 47 (1)   | 6 (1)   | 22 (1) | 4 (1)   |
| P (1)  | 21 (1) | 25 (1) | 34 (1)   | 0 (1)   | 12 (1) | -1 (1)  |
| P (2)  | 21 (1) | 29 (1) | 34 (1)   | -2 (1)  | 10 (1) | -1 (1)  |
| P (3)  | 21 (1) | 30 (1) | 36 (1)   | 1 (1)   | 14 (1) | -2 (1)  |
| O (1)  | 32 (2) | 27 (2) | 51 (3)   | -1 (2)  | 20 (2) | -2 (2)  |
| O (2)  | 22 (2) | 37 (3) | 52 (3)   | 0 (2)   | -2 (2) | -1 (2)  |
| O (3)  | 29 (2) | 27 (2) | 54 (3)   | 4 (2)   | 19 (2) | -2 (2)  |
| O (4)  | 20 (2) | 38 (2) | 41 (3)   | 2 (2)   | 6 (2)  | 0 (2)   |
| O (5)  | 42 (2) | 40 (3) | 47 (3)   | 0 (2)   | 26 (2) | 2 (2)   |
| O (6)  | 43 (3) | 36 (3) | 59 (3)   | -5 (2)  | 29 (2) | -4 (2)  |
| O (7)  | 29 (2) | 39 (2) | 48 (3)   | -1 (2)  | 17 (2) | 1 (2)   |
| O (8)  | 40 (2) | 39 (2) | 53 (3)   | -2 (2)  | 31 (2) | 0 (2)   |
| O (9)  | 34 (2) | 32 (2) | 58 (3)   | -1 (2)  | 25 (2) | 2 (2)   |
| O (10) | 35 (2) | 39 (2) | 53 (3)   | -1 (2)  | 25 (2) | 3 (2)   |
| O (11) | 35 (3) | 57 (4) | 113 (5)  | 23 (3)  | 9 (3)  | -10 (3) |
| O (12) | 35 (3) | 55 (3) | 54 (3)   | 9 (3)   | 16 (2) | 10 (2)  |
| O (13) | 64 (4) | 43 (3) | 179 (7)  | 23 (4)  | 72 (5) | 9 (3)   |
| O (14) | 46 (3) | 45 (3) | 69 (3)   | 14 (3)  | 33 (3) | 2 (2)   |
| O (15) | 36 (3) | 52 (3) | 83 (4)   | 15 (3)  | 36 (3) | 17 (2)  |
| O (16) | 49 (3) | 42 (3) | 85 (4)   | 17 (3)  | 36 (3) | 4 (2)   |
| N (1)  | 26 (3) | 25 (3) | 40 (3)   | 3 (2)   | 18 (2) | 0 (2)   |
| C (1)  | 20 (3) | 29 (3) | 31 (3)   | -1 (3)  | 13 (3) | 1 (2)   |
| C (2)  | 23 (3) | 32 (3) | 33 (3)   | 2 (3)   | 16 (3) | 5 (2)   |
| C (3)  | 24 (3) | 28 (3) | 42 (4)   | 5 (3)   | 19 (3) | 6 (2)   |
| C (4)  | 26 (3) | 26 (3) | 42 (4)   | -1 (3)  | 23 (3) | 1 (2)   |
| C (5)  | 24 (3) | 32 (4) | 41 (4)   | -2 (3)  | 20 (3) | -3 (3)  |
| C (6)  | 21 (3) | 29 (3) | 39 (3)   | -2 (3)  | 16 (3) | -5 (2)  |
| C (7)  | 22 (3) | 30 (3) | 42 (4)   | -5 (3)  | 18 (3) | -6 (3)  |
| C (8)  | 27 (3) | 44 (4) | 37 (4)   | -3 (3)  | 15 (3) | -10 (3) |
| C (9)  | 20 (3) | 30 (3) | 35 (3)   | 7 (3)   | 12 (3) | -1 (2)  |
| C (10) | 22 (3) | 35 (3) | 36 (4)   | 6 (3)   | 12 (3) | -10 (3) |
| C (11) | 22 (3) | 26 (3) | 41 (4)   | 7 (3)   | 14 (3) | 4 (2)   |
| C (12) | 23 (3) | 42 (4) | 46 (4)   | 9 (3)   | 15 (3) | 1 (3)   |
| C (13) | 29 (3) | 52 (4) | 50 (4)   | 6 (3)   | 27 (3) | 11 (3)  |
| C (14) | 37 (3) | 34 (3) | 43 (4)   | -1 (3)  | 21 (3) | 3 (3)   |
| C (15) | 25 (3) | 26 (3) | 36 (3)   | 7 (3)   | 16 (3) | 3 (2)   |
| C (16) | 29 (3) | 27 (3) | 26 (3)   | -5 (3)  | 13 (3) | -5 (2)  |
| C (17) | 21 (3) | 27 (3) | 27 (3)   | -2 (2)  | 11 (3) | -3 (2)  |
| C (18) | 30 (3) | 24 (3) | 38 (4)   | -8 (3)  | 22 (3) | -7 (2)  |
| C (19) | 23 (3) | 30 (3) | 33 (3)   | -8 (3)  | 15 (3) | -3 (2)  |
| C (20) | 19 (3) | 34 (3) | 26 (3)   | -5 (3)  | 11 (2) | 0 (2)   |
| C (21) | 23 (3) | 35 (3) | 32 (3)   | -1 (3)  | 13 (3) | -1 (3)  |
| C (22) | 32 (3) | 44 (4) | 44 (4)   | 5 (3)   | 18 (3) | 2 (3)   |
| C (23) | 29 (3) | 33 (3) | 44 (4)   | 8 (3)   | 17 (3) | 2 (3)   |
| C (24) | 32 (3) | 44 (4) | 47 (4)   | -10 (3) | 22 (3) | -8 (3)  |
| C (25) | 34 (4) | 58 (4) | 35 (4)   | -1 (3)  | 9 (3)  | -3 (3)  |
| C (26) | 31 (3) | 39 (4) | 63 (5)   | 6 (3)   | 26 (3) | -1 (3)  |
| C (27) | 32 (3) | 36 (4) | 66 (5)   | 3 (3)   | 28 (4) | -3 (3)  |
| C (28) | 32 (3) | 37 (4) | 66 (5)   | 2 (3)   | 34 (4) | 4 (3)   |
| C (29) | 26 (3) | 42 (4) | 48 (4)   | 4 (3)   | 25 (3) | 11 (3)  |
| C (30) | 47 (4) | 28 (3) | 75 (5)   | -6 (3)  | 46 (4) | -2 (3)  |
| C (31) | 35 (4) | 65 (5) | 54 (5)   | -26 (4) | 30 (4) | -5 (4)  |
| C (32) | 39 (4) | 55 (4) | 52 (4)   | 9 (4)   | 33 (4) | 13 (3)  |
| C (33) | 66 (5) | 38 (4) | 116 (7)  | -9 (4)  | 70 (5) | -10 (4) |
| C (34) | 31 (4) | 85 (6) | 64 (5)   | 8 (5)   | 22 (4) | 14 (4)  |
| C (35) | 94 (7) | 35 (4) | 140 (10) | 9 (5)   | 91 (7) | 12 (4)  |

|        |          |          |          |         |          |          |
|--------|----------|----------|----------|---------|----------|----------|
| C (36) | 47 (5)   | 140 (10) | 85 (7)   | -62 (6) | 41 (5)   | -29 (5)  |
| C (37) | 91 (7)   | 121 (8)  | 66 (6)   | 40 (6)  | 60 (6)   | 46 (6)   |
| C (38) | 45 (4)   | 46 (4)   | 45 (4)   | -3 (3)  | 24 (3)   | 8 (3)    |
| C (39) | 55 (4)   | 36 (4)   | 55 (5)   | -8 (3)  | 25 (4)   | 2 (3)    |
| C (40) | 40 (4)   | 42 (4)   | 49 (4)   | -3 (3)  | 16 (3)   | -8 (3)   |
| C (41) | 25 (3)   | 45 (4)   | 49 (4)   | 5 (3)   | 11 (3)   | 0 (3)    |
| C (42) | 31 (4)   | 53 (4)   | 72 (5)   | 1 (4)   | 28 (4)   | 5 (3)    |
| C (43) | 47 (4)   | 47 (4)   | 66 (5)   | -3 (4)  | 40 (4)   | 0 (3)    |
| C (44) | 49 (4)   | 46 (4)   | 46 (4)   | -6 (3)  | 27 (4)   | 3 (3)    |
| C (45) | 47 (4)   | 38 (4)   | 55 (5)   | -9 (3)  | 31 (4)   | 3 (3)    |
| C (46) | 44 (4)   | 34 (4)   | 58 (5)   | -2 (3)  | 29 (4)   | -1 (3)   |
| C (47) | 38 (4)   | 34 (4)   | 65 (5)   | -1 (3)  | 29 (4)   | -1 (3)   |
| C (48) | 36 (4)   | 49 (4)   | 64 (5)   | 5 (4)   | 35 (4)   | 4 (3)    |
| C (49) | 50 (4)   | 47 (4)   | 61 (5)   | 8 (4)   | 40 (4)   | 9 (3)    |
| C (50) | 54 (5)   | 73 (6)   | 95 (7)   | -4 (5)  | 37 (5)   | -12 (5)  |
| C (51) | 27 (4)   | 140 (10) | 130 (10) | 60 (8)  | 20 (5)   | 0 (5)    |
| C (52) | 79 (7)   | 96 (8)   | 200 (10) | 80 (10) | 90 (10)  | 53 (6)   |
| C (53) | 88 (7)   | 51 (5)   | 74 (6)   | 23 (5)  | 31 (5)   | 33 (5)   |
| C (54) | 75 (7)   | 67 (6)   | 180 (10) | 76 (7)  | 49 (8)   | 17 (6)   |
| C (55) | 92 (7)   | 54 (5)   | 140 (10) | 22 (6)  | 86 (7)   | 4 (5)    |
| C (56) | 43 (4)   | 70 (5)   | 88 (6)   | 6 (5)   | 41 (5)   | -2 (4)   |
| C (57) | 32 (4)   | 77 (6)   | 53 (5)   | 0 (4)   | 24 (4)   | 9 (4)    |
| C (58) | 50 (5)   | 68 (6)   | 114 (8)  | 28 (5)  | 44 (5)   | 31 (4)   |
| C (59) | 53 (5)   | 71 (6)   | 130 (10) | 43 (6)  | 24 (6)   | 20 (5)   |
| C (60) | 74 (7)   | 50 (6)   | 180 (10) | 49 (7)  | 12 (8)   | -6 (5)   |
| C (61) | 93 (7)   | 36 (4)   | 109 (8)  | -1 (5)  | 71 (6)   | -10 (4)  |
| N (2)  | 150 (10) | 150 (10) | 130 (10) | -27 (7) | 103 (8)  | -54 (8)  |
| C (62) | 94 (7)   | 72 (6)   | 78 (7)   | 0 (5)   | 59 (6)   | -1 (5)   |
| C (63) | 160 (10) | 160 (10) | 120 (10) | 85 (8)  | 120 (10) | 110 (10) |

---

The anisotropic displacement factor exponent takes the form  
 $2 \pi^2 [h^2 a^*^2 U(11) + \dots + 2 h k a^* b^* U(12)]$

Table 5. Hydrogen Coordinates ( $\text{Å} \times 10^4$ ) and equivalent isotropic displacement parameters ( $\text{Å}^2 \times 10^3$ ) for **11**

| atom   | x     | y          | z    | U (eq) |
|--------|-------|------------|------|--------|
| H(12)  | 11548 | 2743       | 3533 | 47     |
| H(13)  | 10970 | 1708       | 2834 | 49     |
| H(14)  | 9491  | 1171       | 2470 | 47     |
| H(22A) | 5589  | 5251       | 558  | 64     |
| H(22B) | 5246  | 6002       | 743  | 64     |
| H(22C) | 4847  | 5129       | 710  | 64     |
| H(23A) | 7363  | 7021       | 1938 | 56     |
| H(23B) | 6334  | 6901       | 1341 | 56     |
| H(23C) | 7218  | 6603       | 1364 | 56     |
| H(24A) | 9393  | 6656       | 4019 | 63     |
| H(24B) | 10492 | 6534       | 4498 | 63     |
| H(24C) | 9778  | 6132       | 4608 | 63     |
| H(25A) | 11680 | 5194       | 5040 | 72     |
| H(25B) | 11382 | 4293       | 5050 | 72     |
| H(25C) | 10884 | 5021       | 5139 | 72     |
| H(26A) | 6375  | 1066       | 2721 | 68     |
| H(26B) | 6736  | 590        | 2386 | 68     |
| H(26C) | 5662  | 842        | 2028 | 68     |
| H(27A) | 4582  | 1830       | 1423 | 67     |
| H(27B) | 4522  | 2782       | 1448 | 67     |
| H(27C) | 4875  | 2257       | 2031 | 67     |
| H(33A) | 4160  | 4571       | 2204 | 95     |
| H(33B) | 5040  | 4065       | 2350 | 95     |
| H(33C) | 4318  | 4421       | 1693 | 95     |
| H(34A) | 3614  | 6290       | 1342 | 94     |
| H(34B) | 3915  | 5558       | 1114 | 94     |
| H(34C) | 4252  | 6445       | 1110 | 94     |
| H(35A) | 5414  | 7397       | 1685 | 112    |
| H(35B) | 6345  | 7567       | 2337 | 112    |
| H(35C) | 5346  | 7734       | 2205 | 112    |
| H(36A) | 7410  | 7008       | 3261 | 132    |
| H(36B) | 7644  | 6227       | 3662 | 132    |
| H(36C) | 6971  | 6900       | 3630 | 132    |
| H(37A) | 7160  | 4935       | 3653 | 126    |
| H(37B) | 6348  | 4298       | 3249 | 126    |
| H(37C) | 6233  | 4943       | 3632 | 126    |
| H(38A) | 10258 | 1253       | 5335 | 56     |
| H(38B) | 9612  | 2019       | 4996 | 56     |
| H(39A) | 10431 | 2258       | 4560 | 63     |
| H(39B) | 11120 | 2298       | 5277 | 63     |
| H(40A) | 12512 | 1825       | 5428 | 59     |
| H(40B) | 11950 | 2007       | 4724 | 59     |
| H(41A) | 13182 | 1069       | 5049 | 55     |
| H(41B) | 12692 | 467        | 5243 | 55     |
| H(42A) | 12732 | -403       | 4564 | 64     |
| H(42B) | 12980 | 266        | 4257 | 64     |
| H(43A) | 11480 | 65         | 3342 | 59     |
| H(43B) | 12115 | -724.0001  | 3552 | 59     |
| H(44A) | 10889 | -1656      | 3125 | 57     |
| H(44B) | 10164 | -928       | 2811 | 57     |
| H(45A) | 9486  | -2071      | 2937 | 55     |
| H(45B) | 10224 | -1982      | 3648 | 55     |
| H(46A) | 8899  | -1825      | 3682 | 55     |
| H(46B) | 8183  | -1826.9999 | 2965 | 55     |
| H(47A) | 7726  | -510       | 2992 | 55     |
| H(47B) | 7534  | -1101      | 3370 | 55     |
| H(48A) | 7613  | -70        | 3963 | 56     |

|         |      |           |      |     |
|---------|------|-----------|------|-----|
| H (48B) | 7787 | 572       | 3603 | 56  |
| H (49A) | 8388 | 1005      | 4600 | 58  |
| H (49B) | 9109 | 271       | 4853 | 58  |
| H (50A) | 3582 | -215      | 469  | 93  |
| H (50B) | 3883 | -223      | 22   | 93  |
| H (51A) | 3080 | 901       | -211 | 136 |
| H (51B) | 3502 | 1108      | 469  | 136 |
| H (52A) | 3653 | 2325      | 165  | 145 |
| H (52B) | 3465 | 2019      | -449 | 145 |
| H (53A) | 4337 | 3034      | -292 | 96  |
| H (53B) | 4869 | 3001      | 414  | 96  |
| H (54A) | 6161 | 3220      | 539  | 143 |
| H (54B) | 5794 | 3173      | -141 | 143 |
| H (55A) | 7021 | 2610      | 61   | 101 |
| H (55B) | 7468 | 2940      | 722  | 101 |
| H (56A) | 8462 | 1971      | 1350 | 78  |
| H (56B) | 8419 | 1793      | 761  | 78  |
| H (57A) | 8079 | 452       | 782  | 66  |
| H (57B) | 9024 | 686       | 1412 | 66  |
| H (58A) | 8837 | -295      | 1946 | 96  |
| H (58B) | 8065 | -564      | 1271 | 96  |
| H (59A) | 7733 | -1195     | 1869 | 122 |
| H (59B) | 7783 | -371.0000 | 2184 | 122 |
| H (60A) | 6271 | -924      | 1812 | 166 |
| H (60B) | 6274 | -1522     | 1361 | 166 |
| H (61A) | 4904 | -1127     | 588  | 87  |
| H (61B) | 4777 | -1079     | 1118 | 87  |
| H (63A) | 8506 | 3547      | 3877 | 190 |
| H (63B) | 7655 | 3055      | 3331 | 190 |
| H (63C) | 8581 | 2597      | 3843 | 190 |
